# Supplementary material for: Design, Synthesis and Hepatoprotective Activity of Analogs of the Natural Product Goodyeroside A
Source: MDPI journal article supplement (doi:10.3390/molecules18021933), 2013-02-01

# Supplementary Materials

Figure 1.  $^1\text{H}$ -NMR of compound 2b.

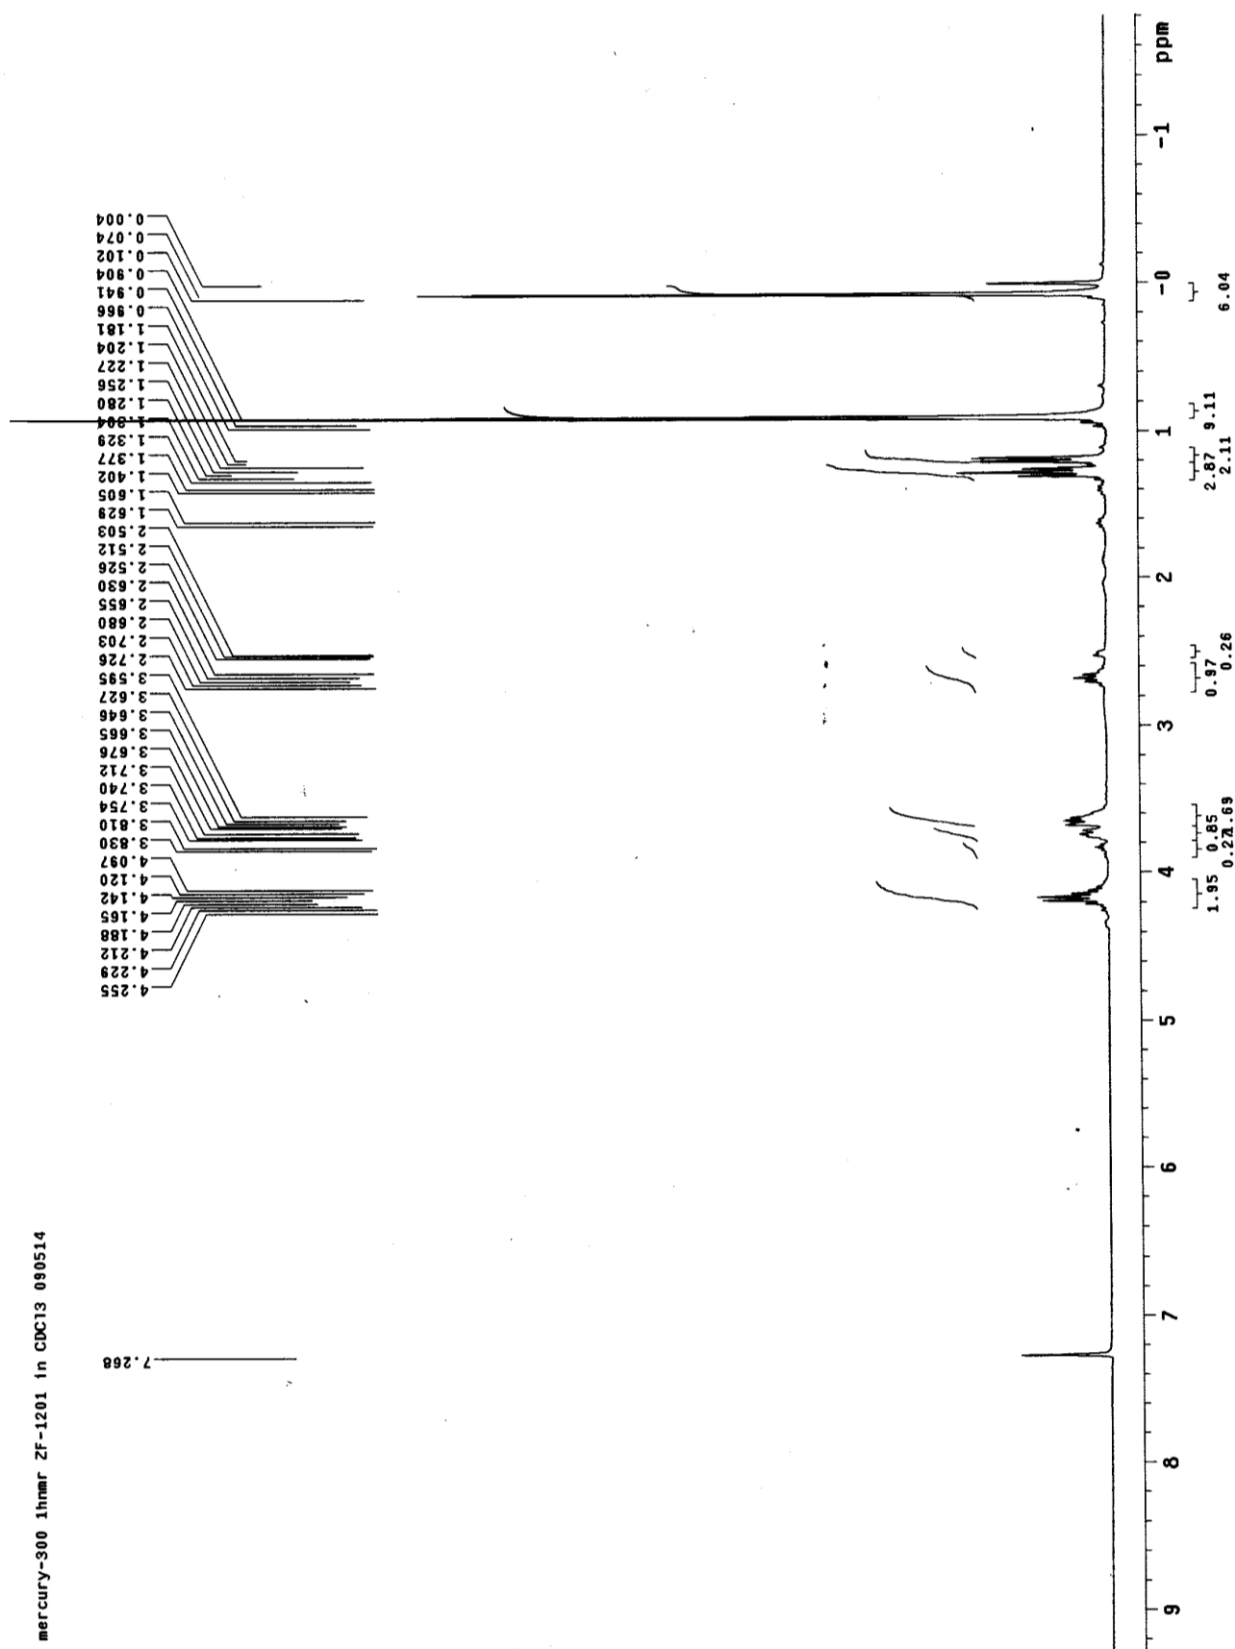

Figure 2. HRMS of compound 2b.

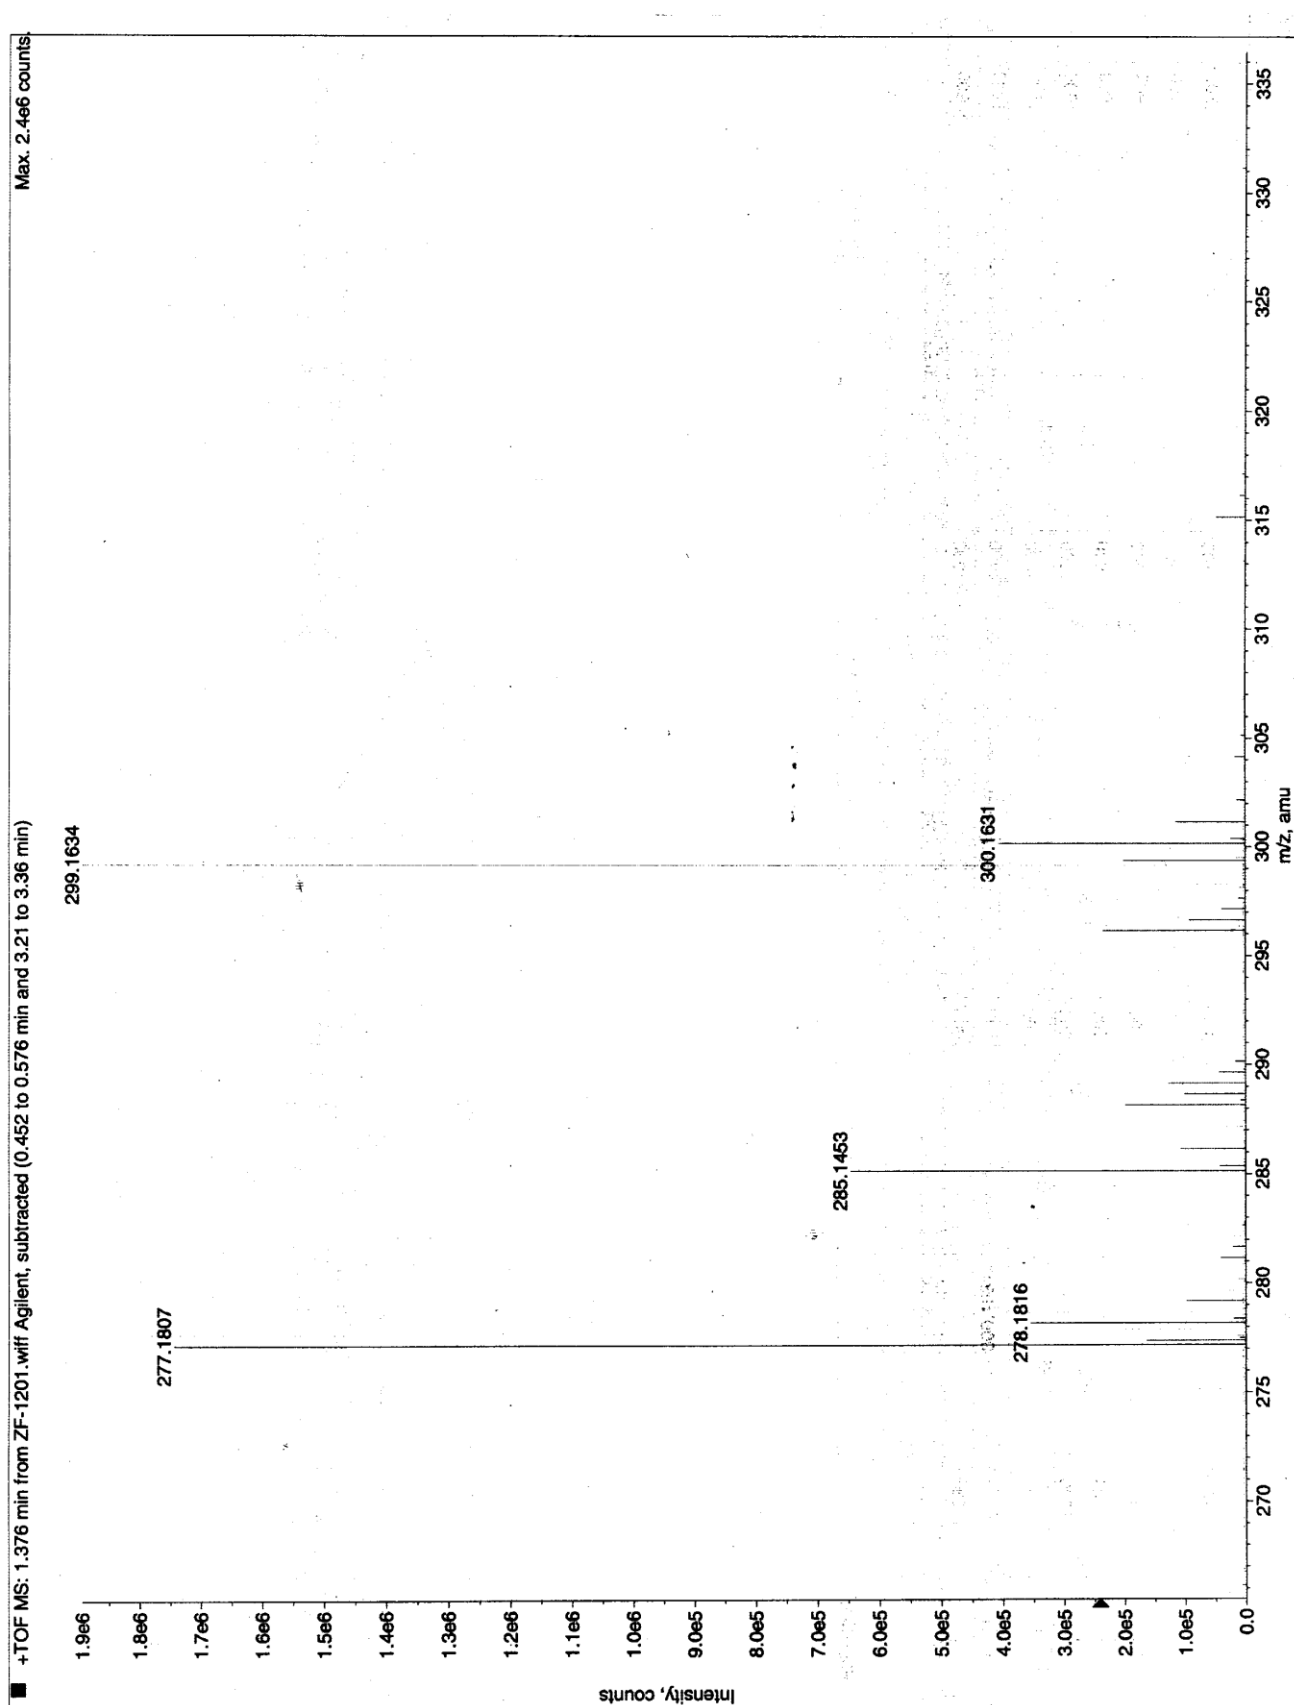

Figure 3.  $^1\text{H}$ -NMR of compound 2c.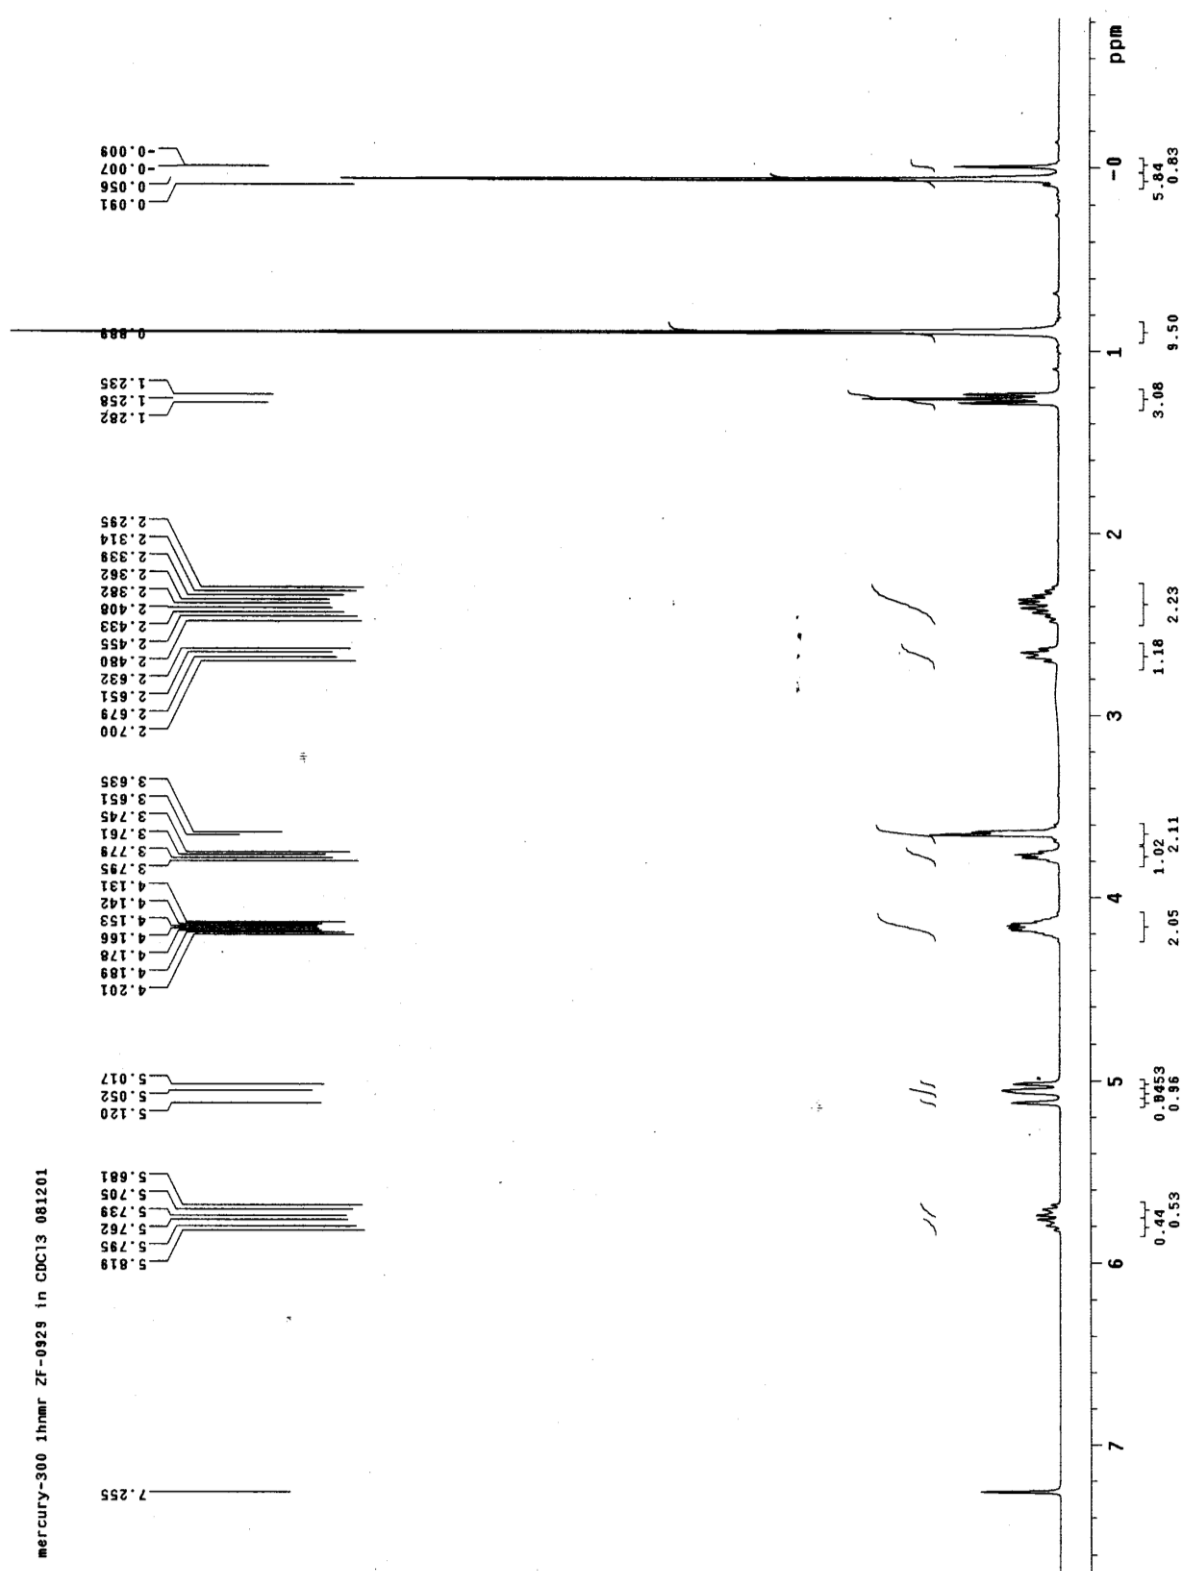

Figure 4. HRMS of compound 2c.

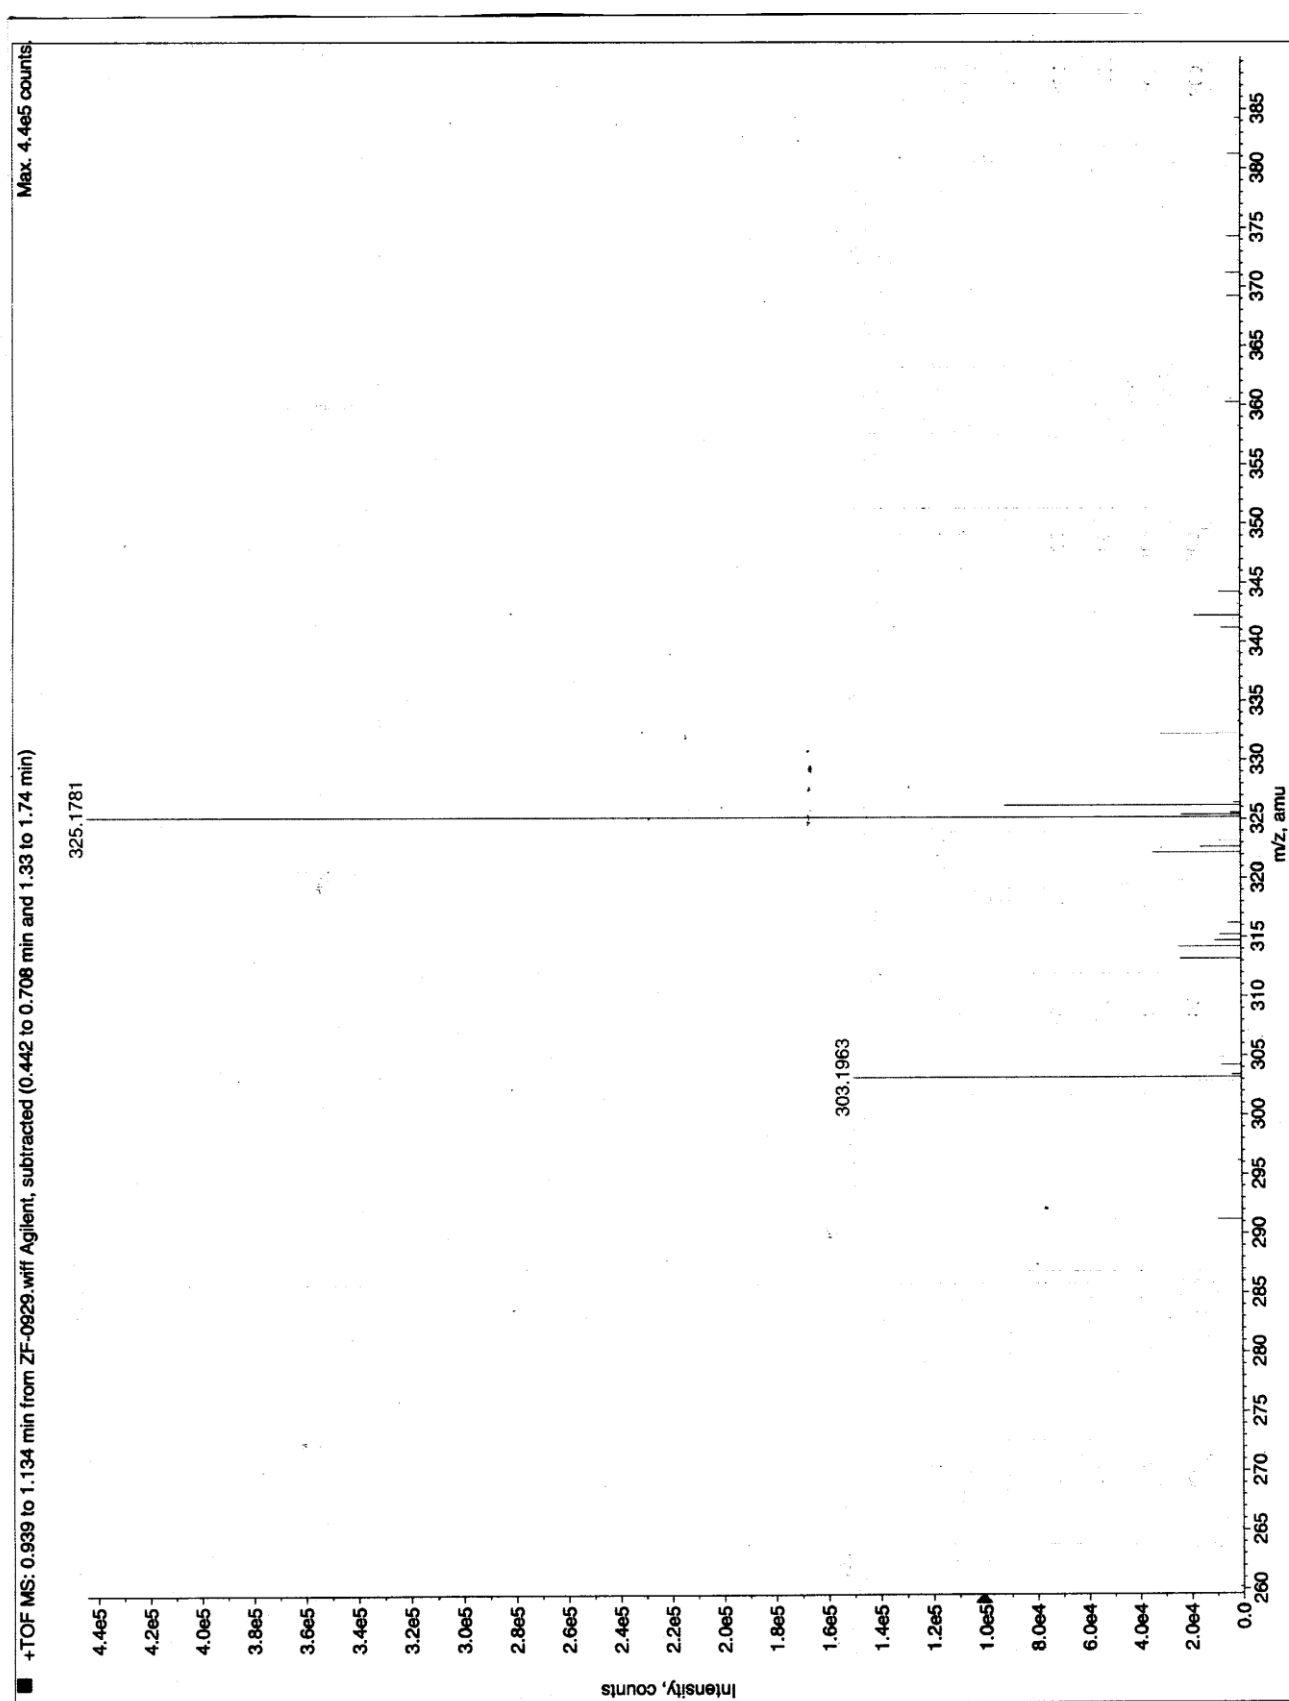



Figure 5.  $^1\text{H}$ -NMR of compound 2d.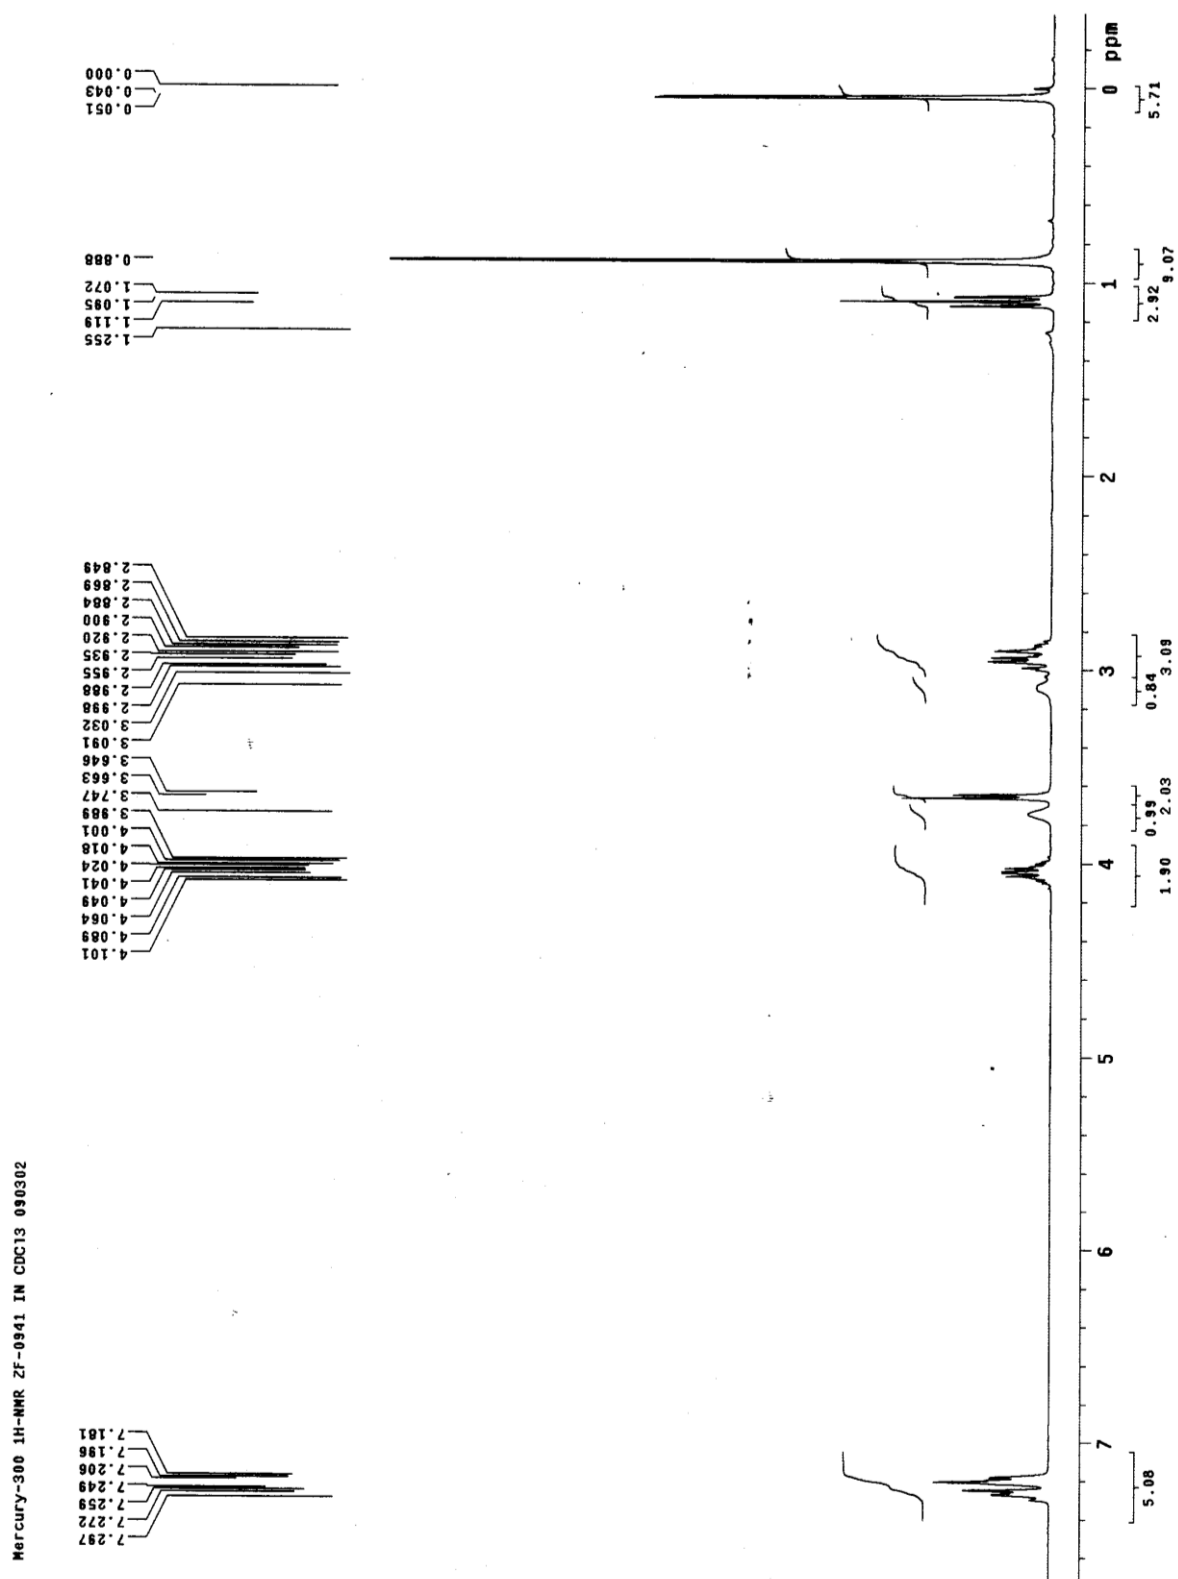

Figure 6. HRMS of compound 2d.

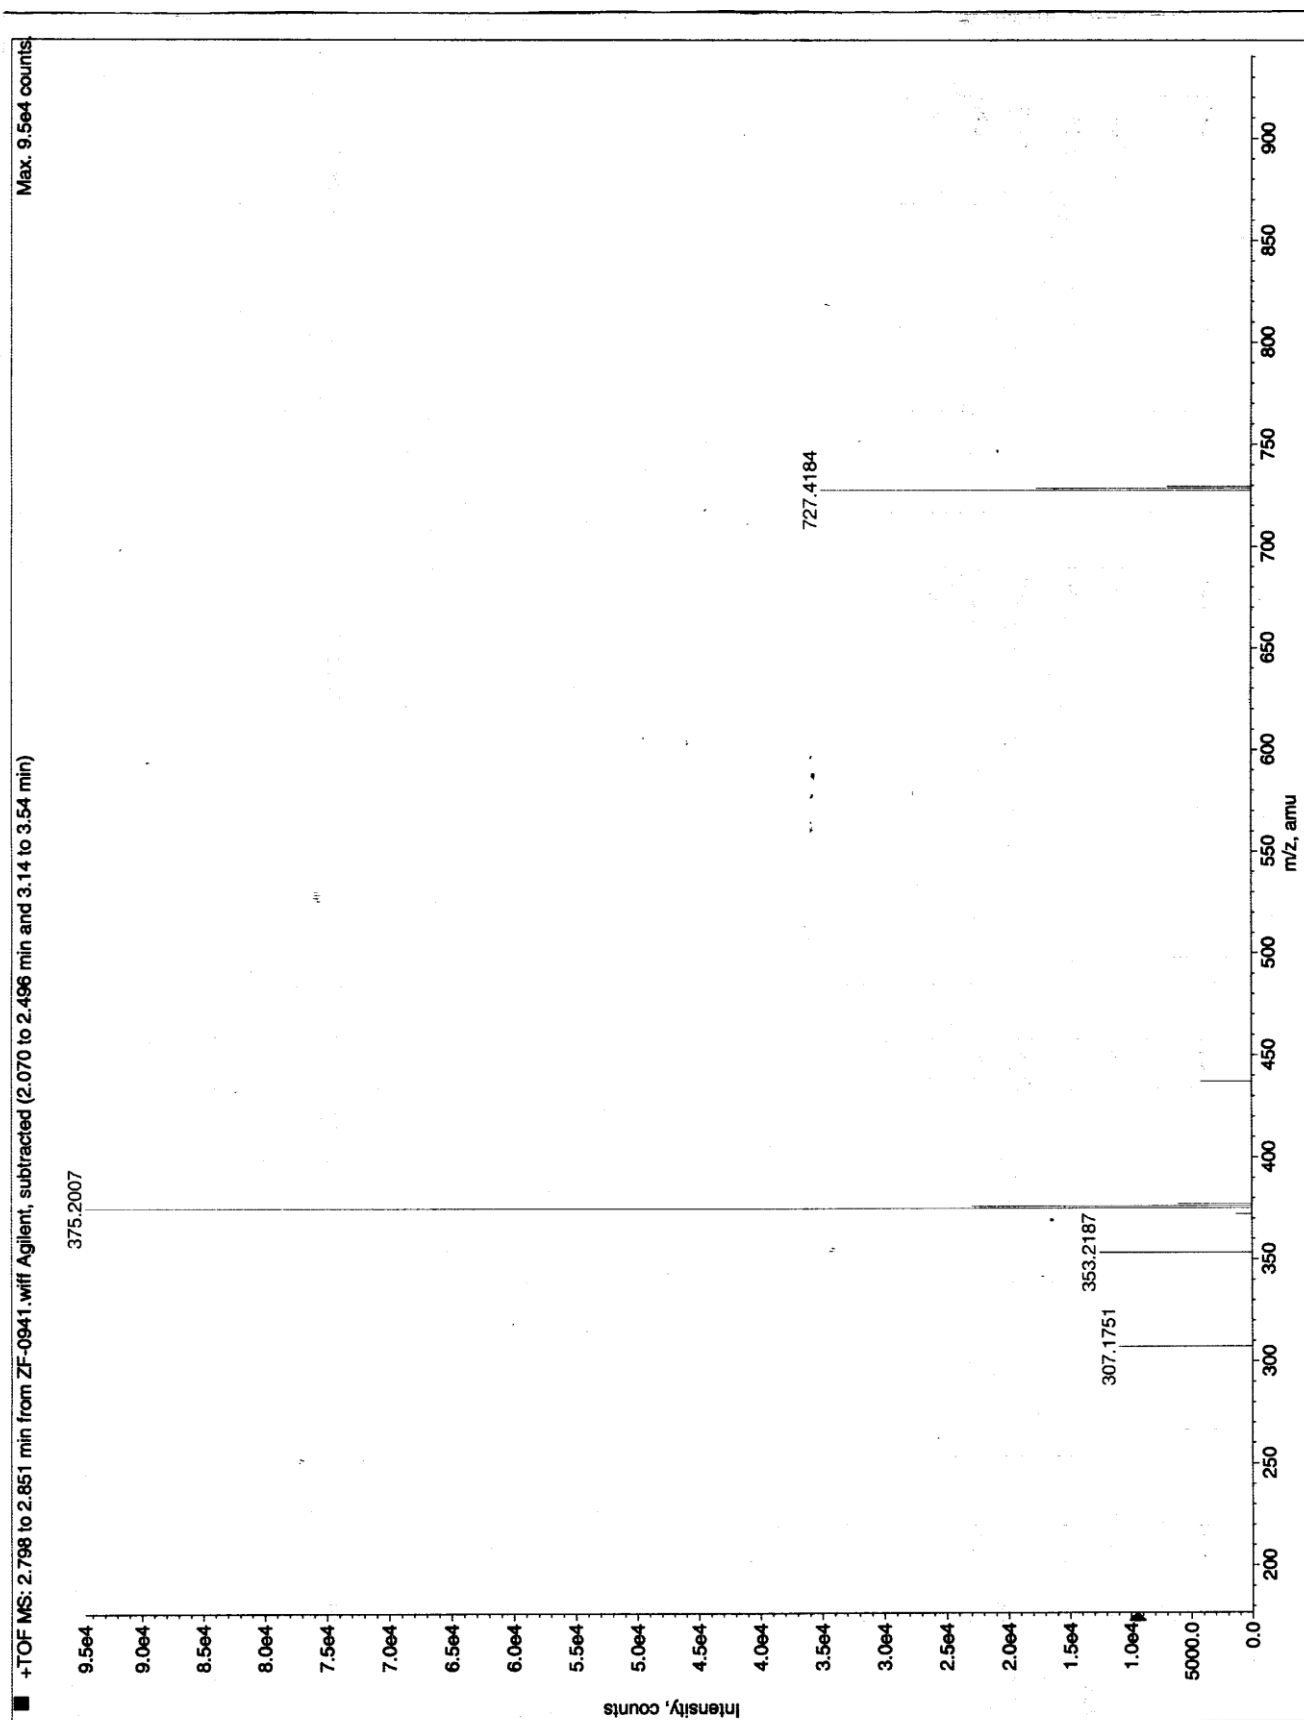

Figure 7.  $^1\text{H}$ -NMR of compound 2e.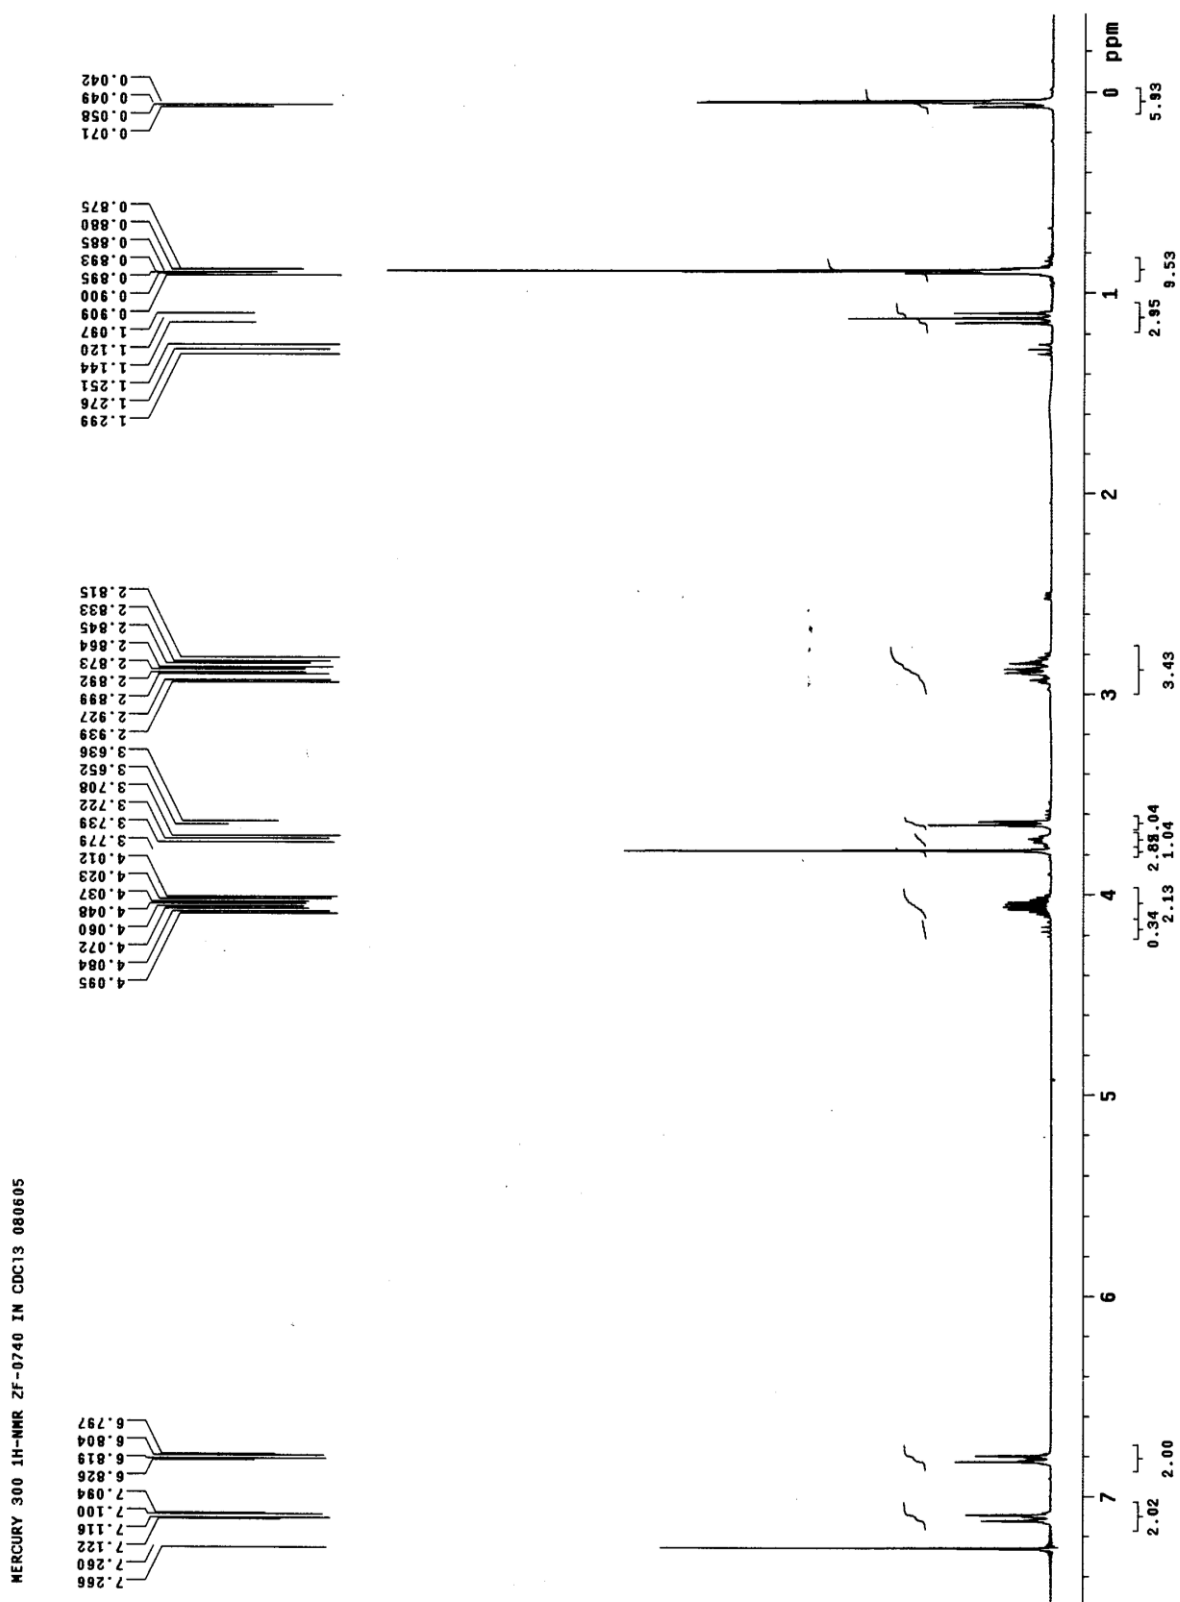

Figure 8. HRMS of compound 2e.

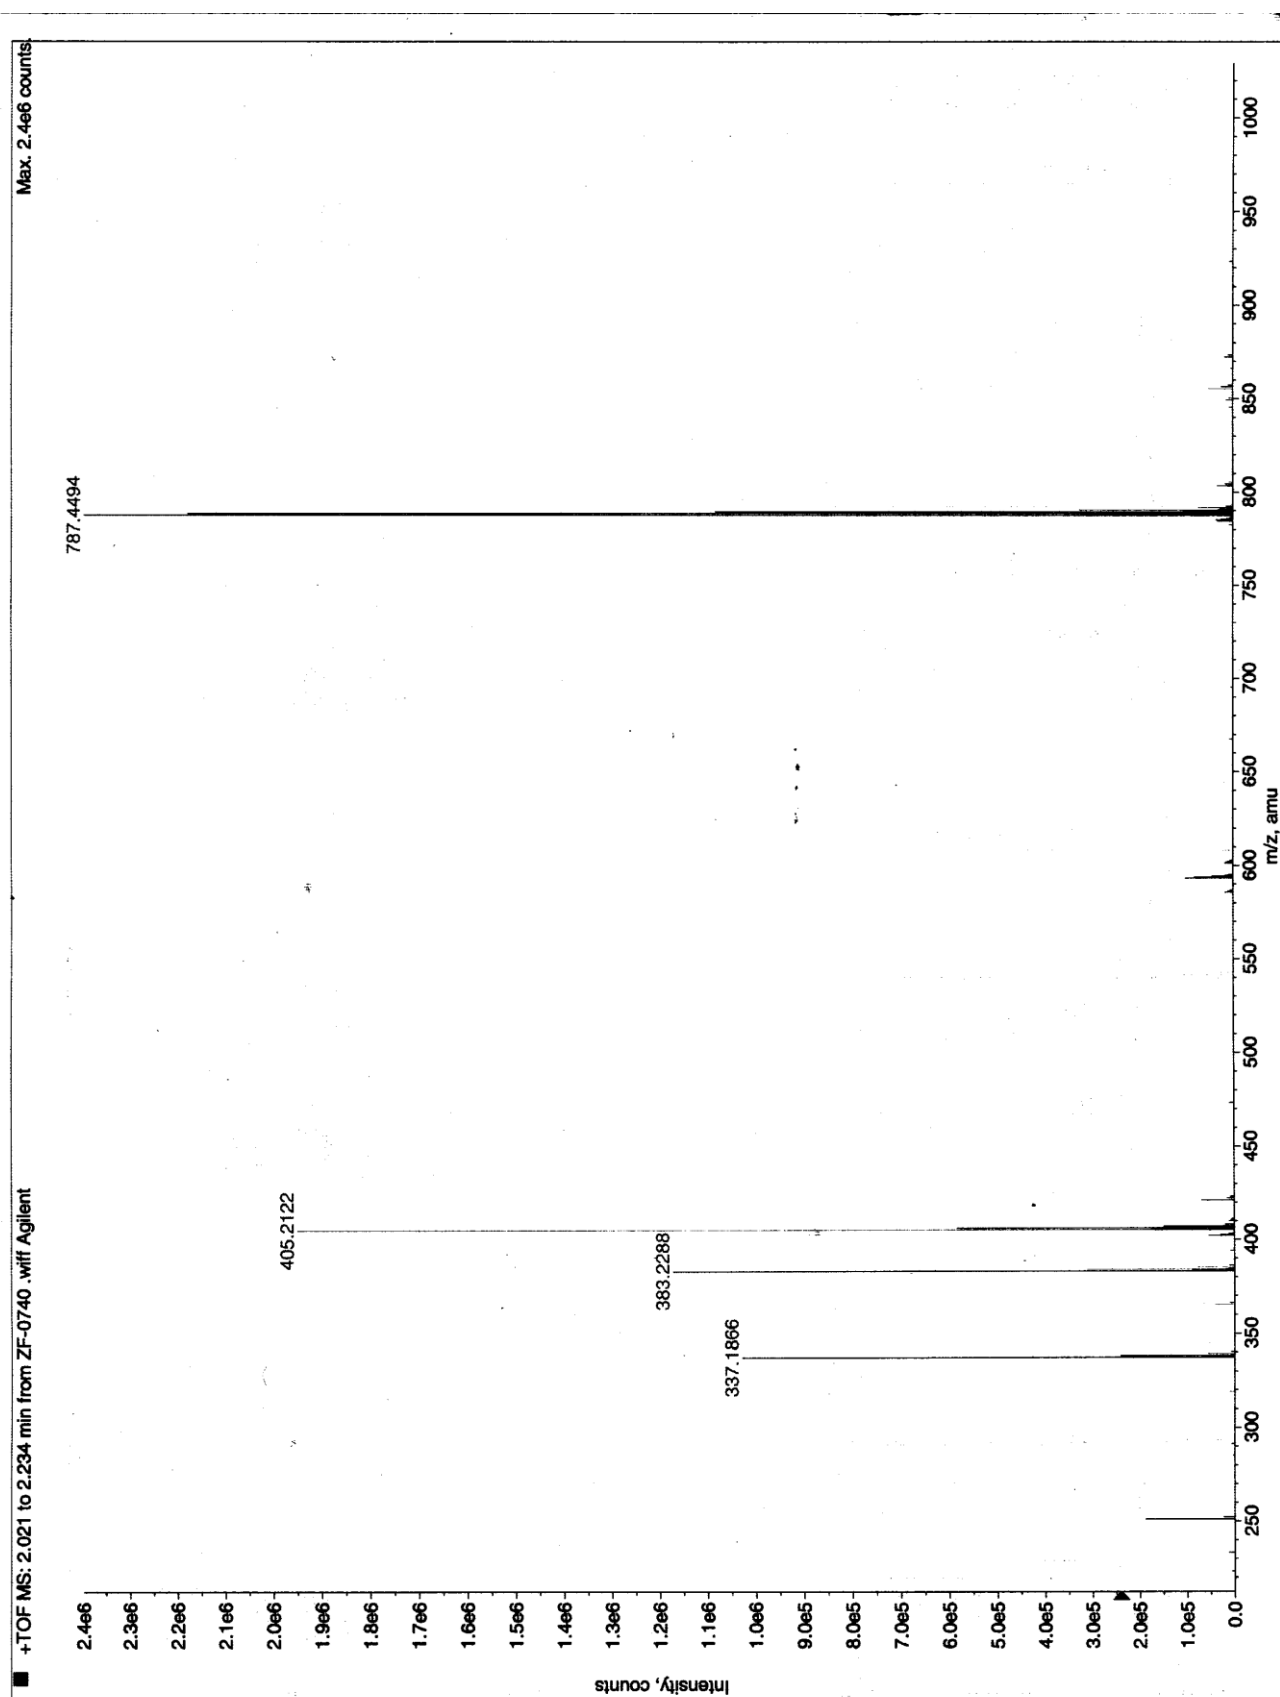

Figure 9.  $^1\text{H}$ -NMR of compound 3a.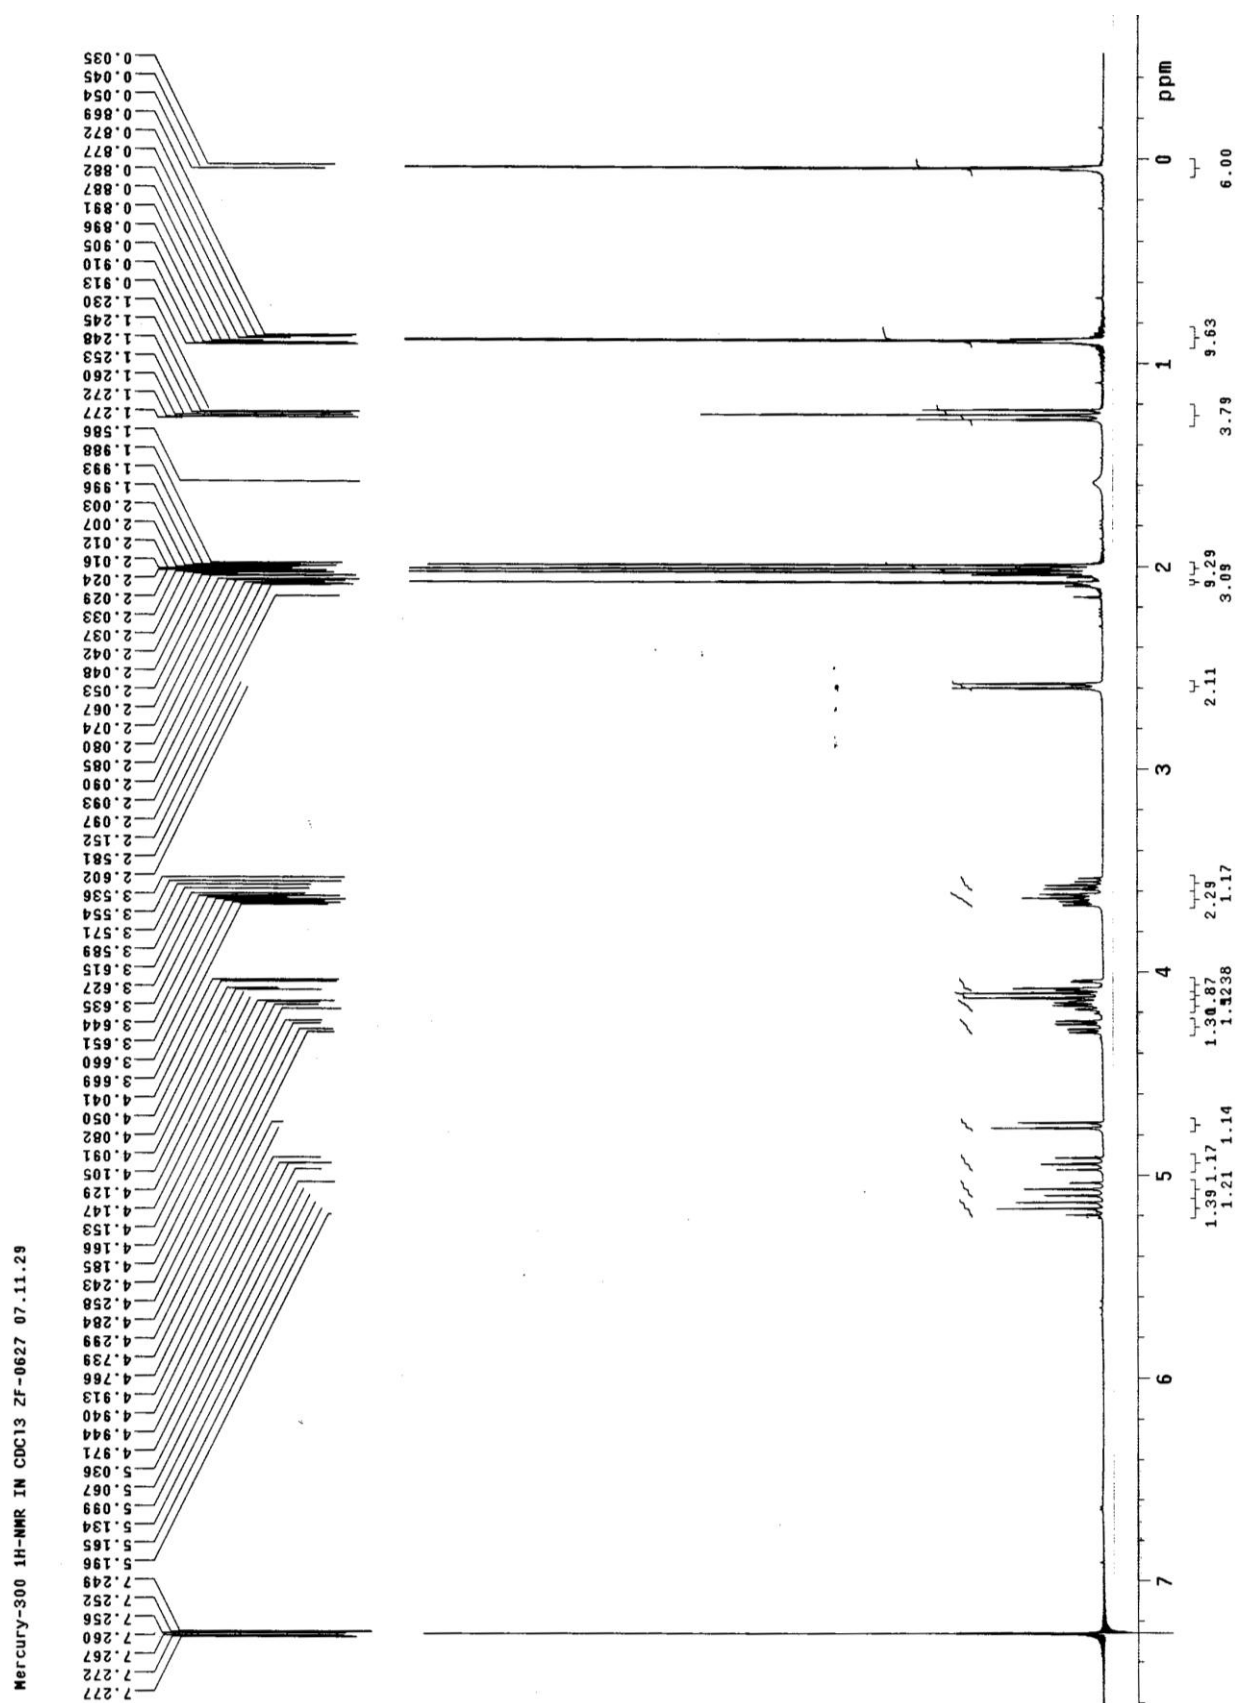

Figure 10. HRMS of compound 3a.

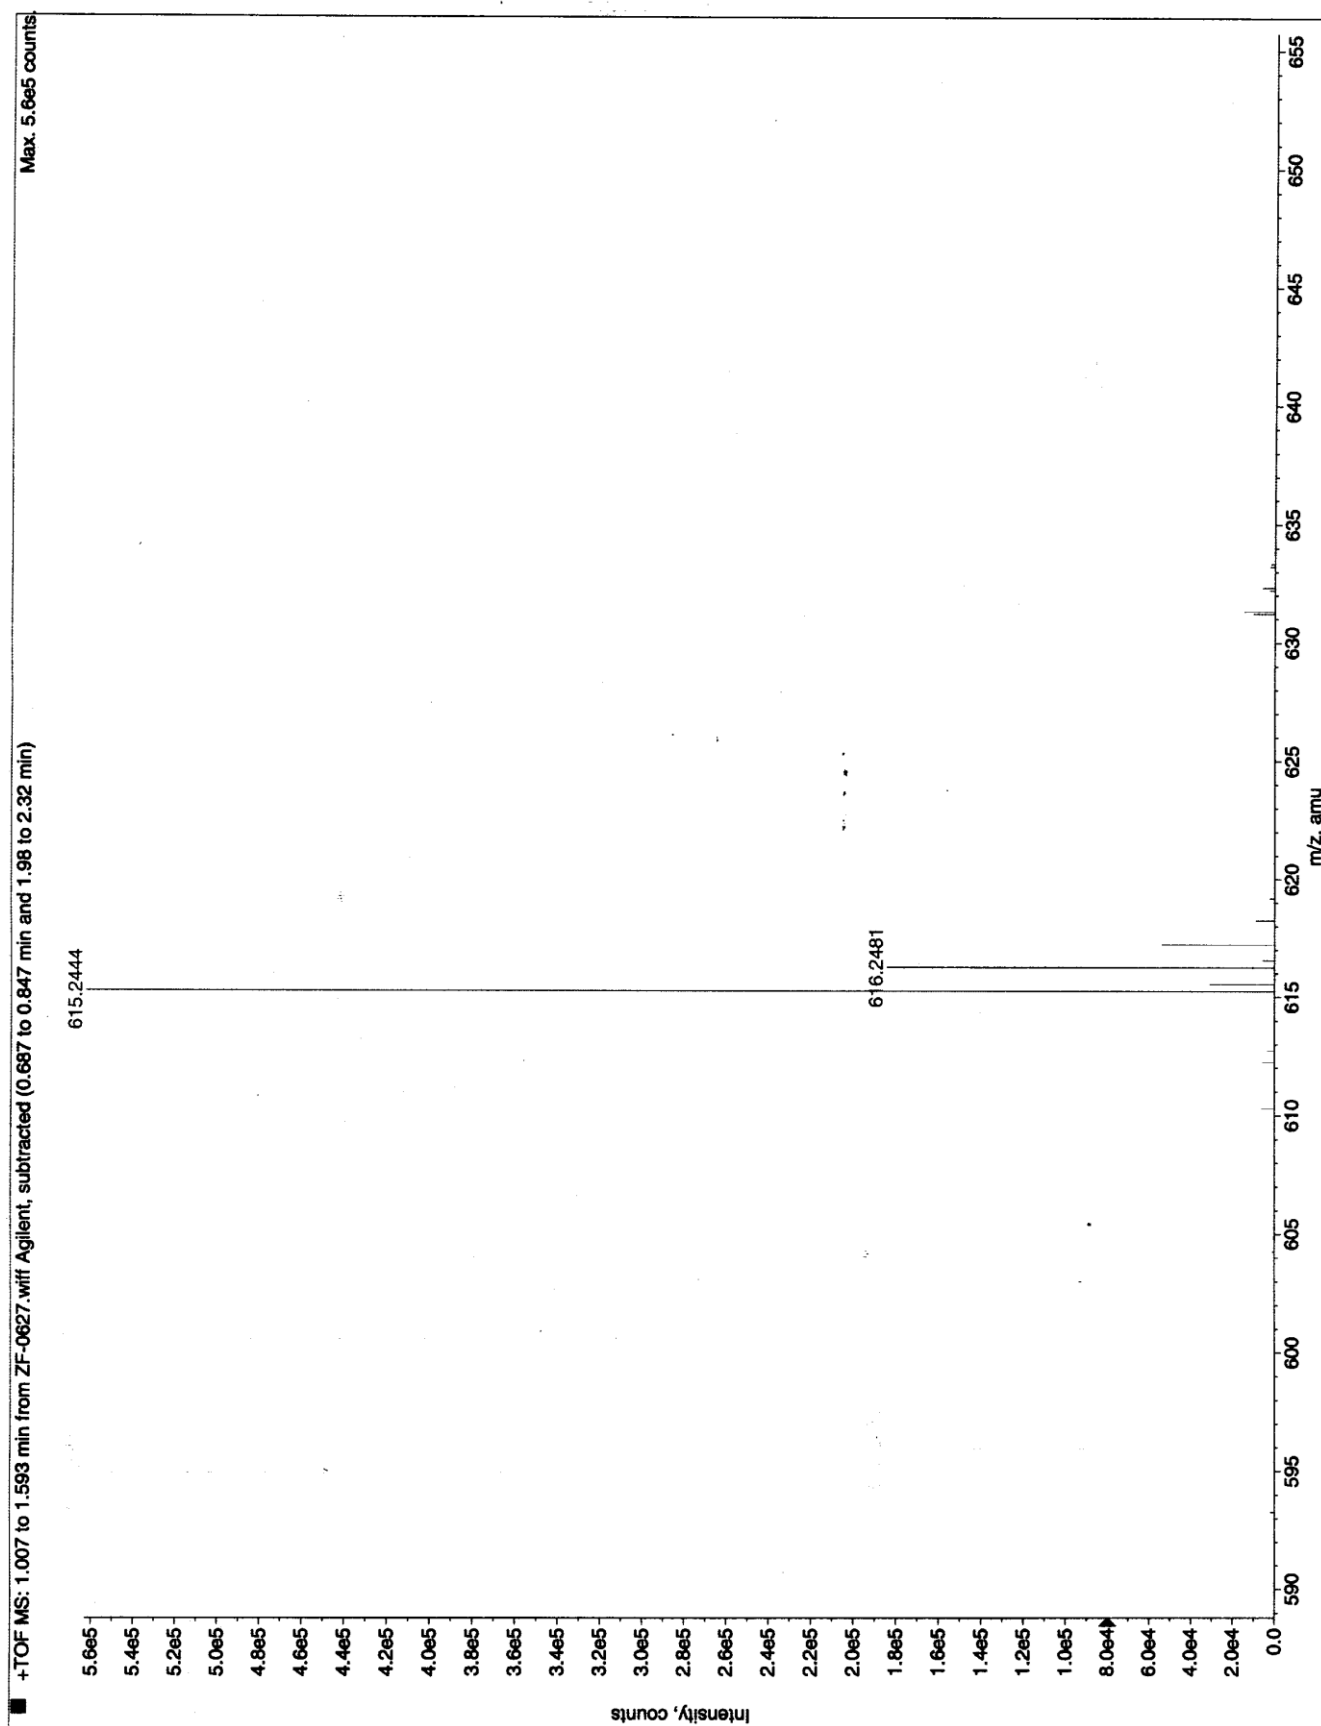

**Figure 11.**  $^1\text{H}$ -NMR of compound **3b**.

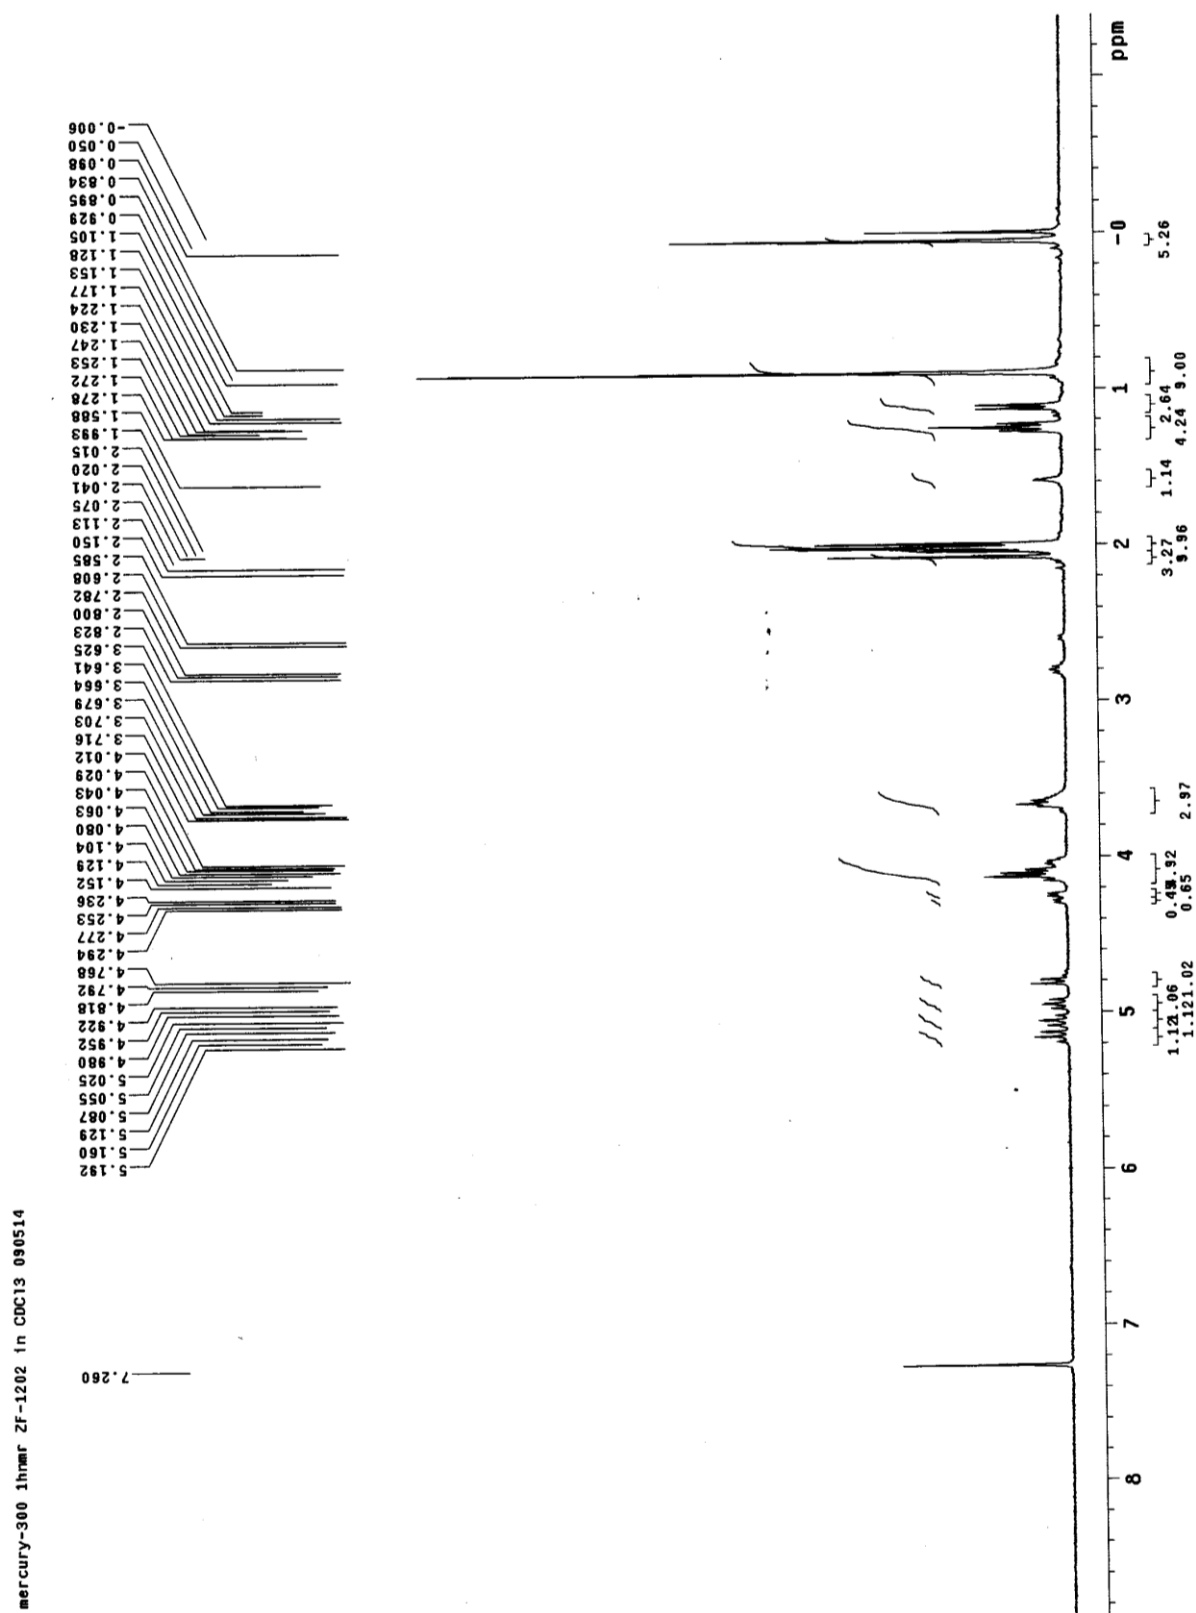

Figure 12. HRMS of compound 3b.

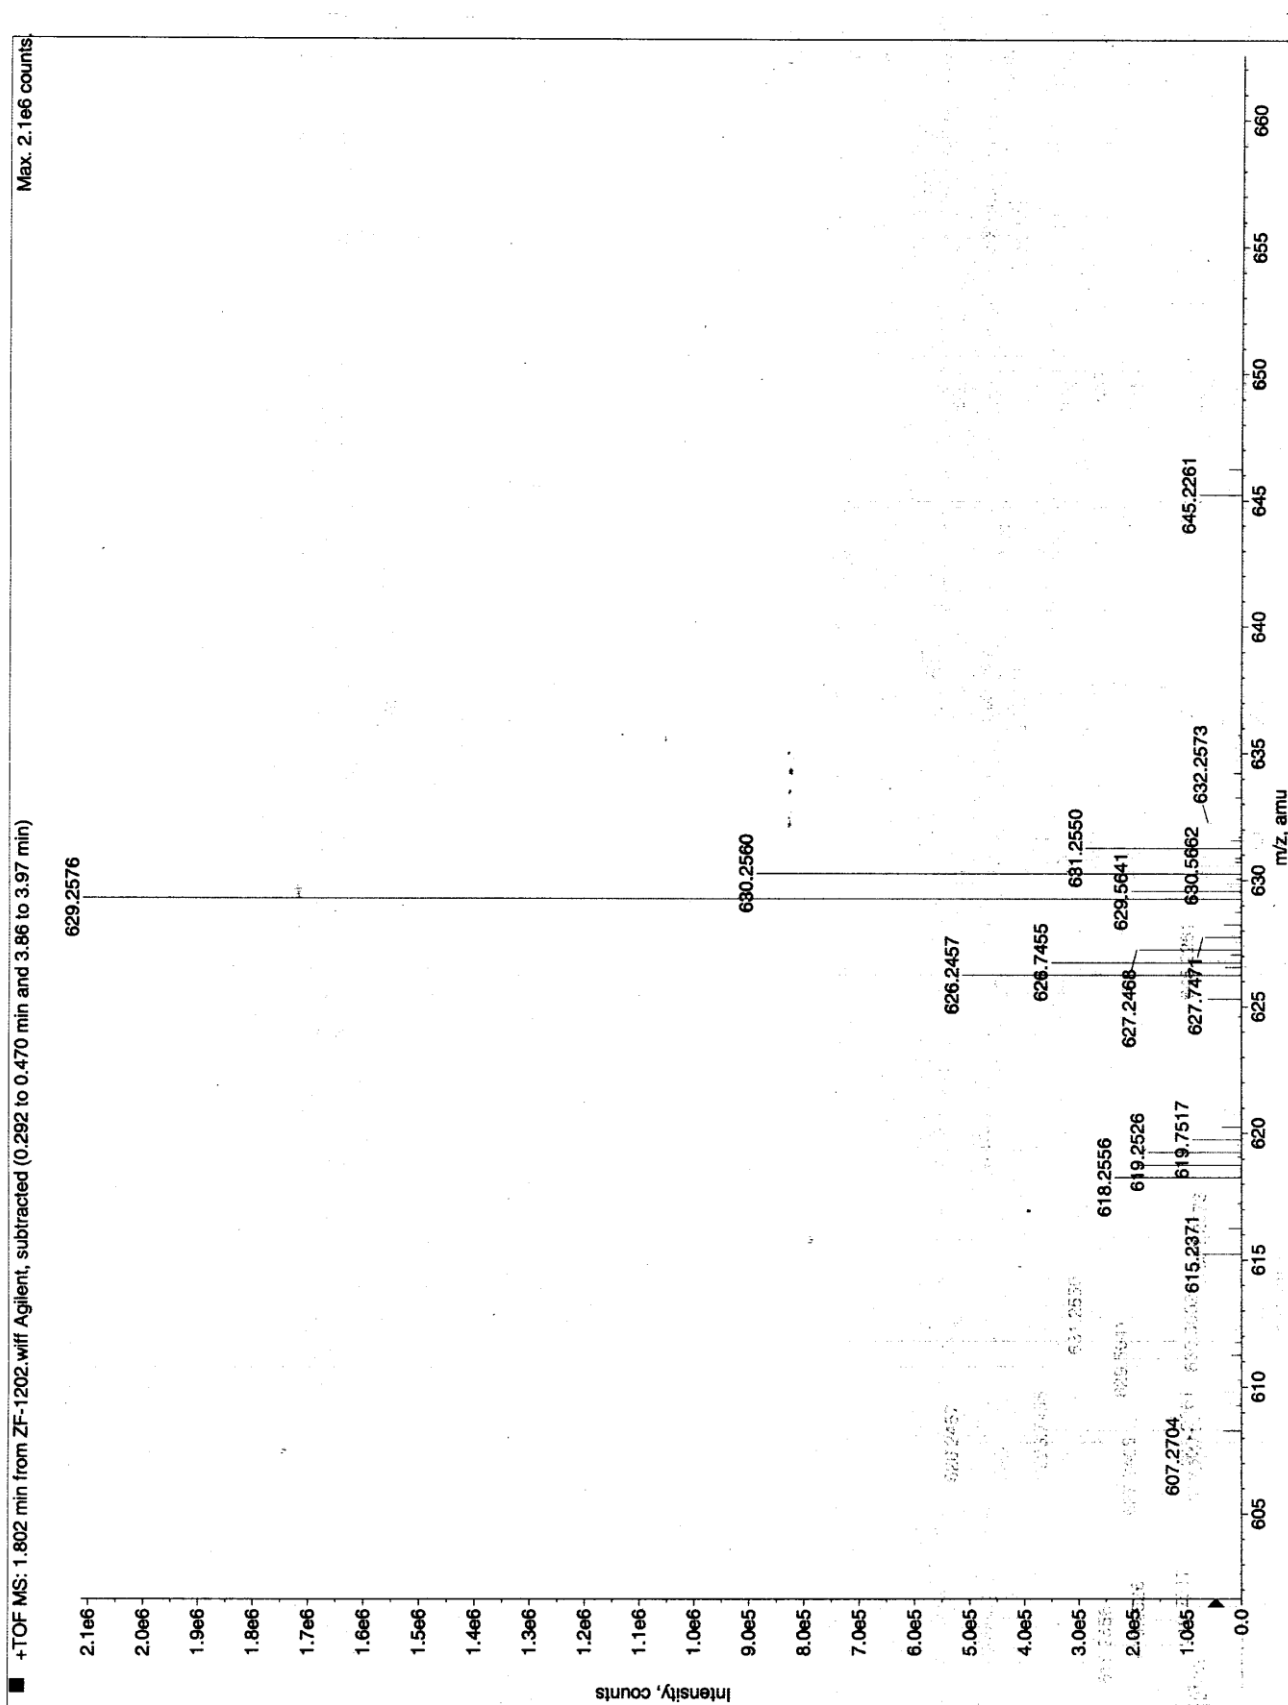



Figure 13.  $^1\text{H}$ -NMR of compound 3c.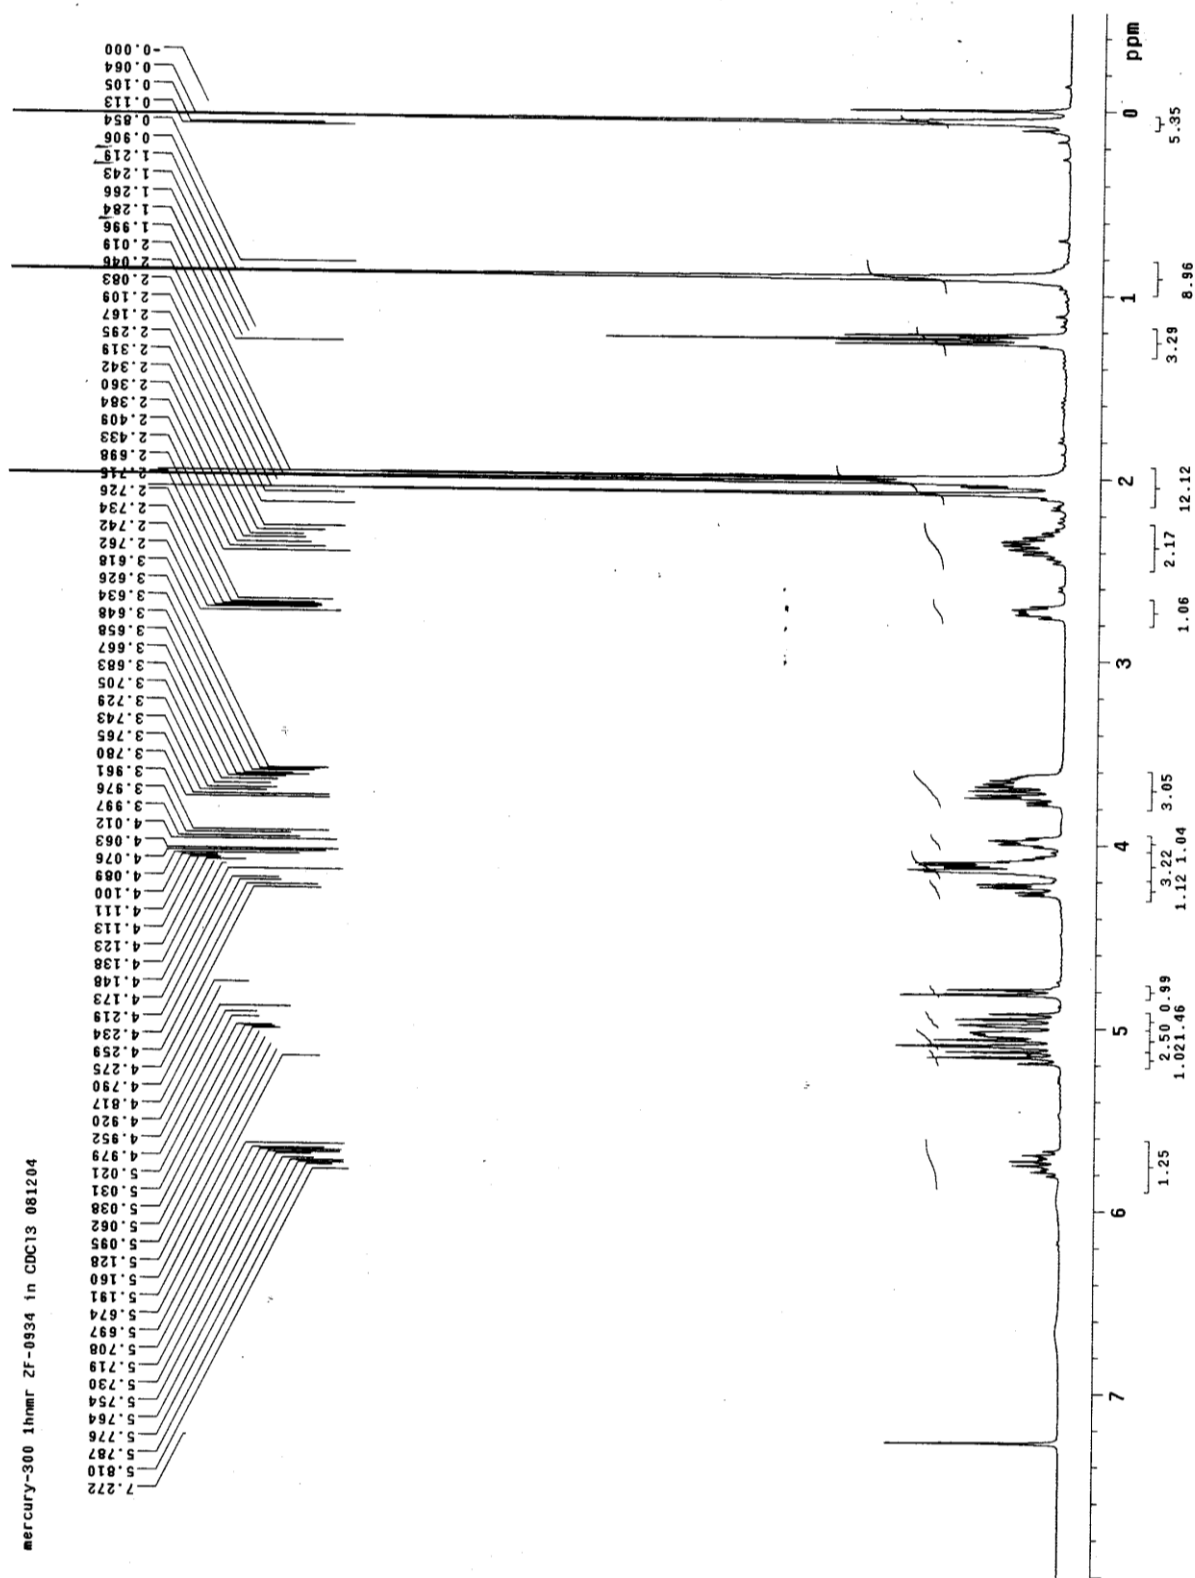

Figure 14. HRMS of compound 3c.

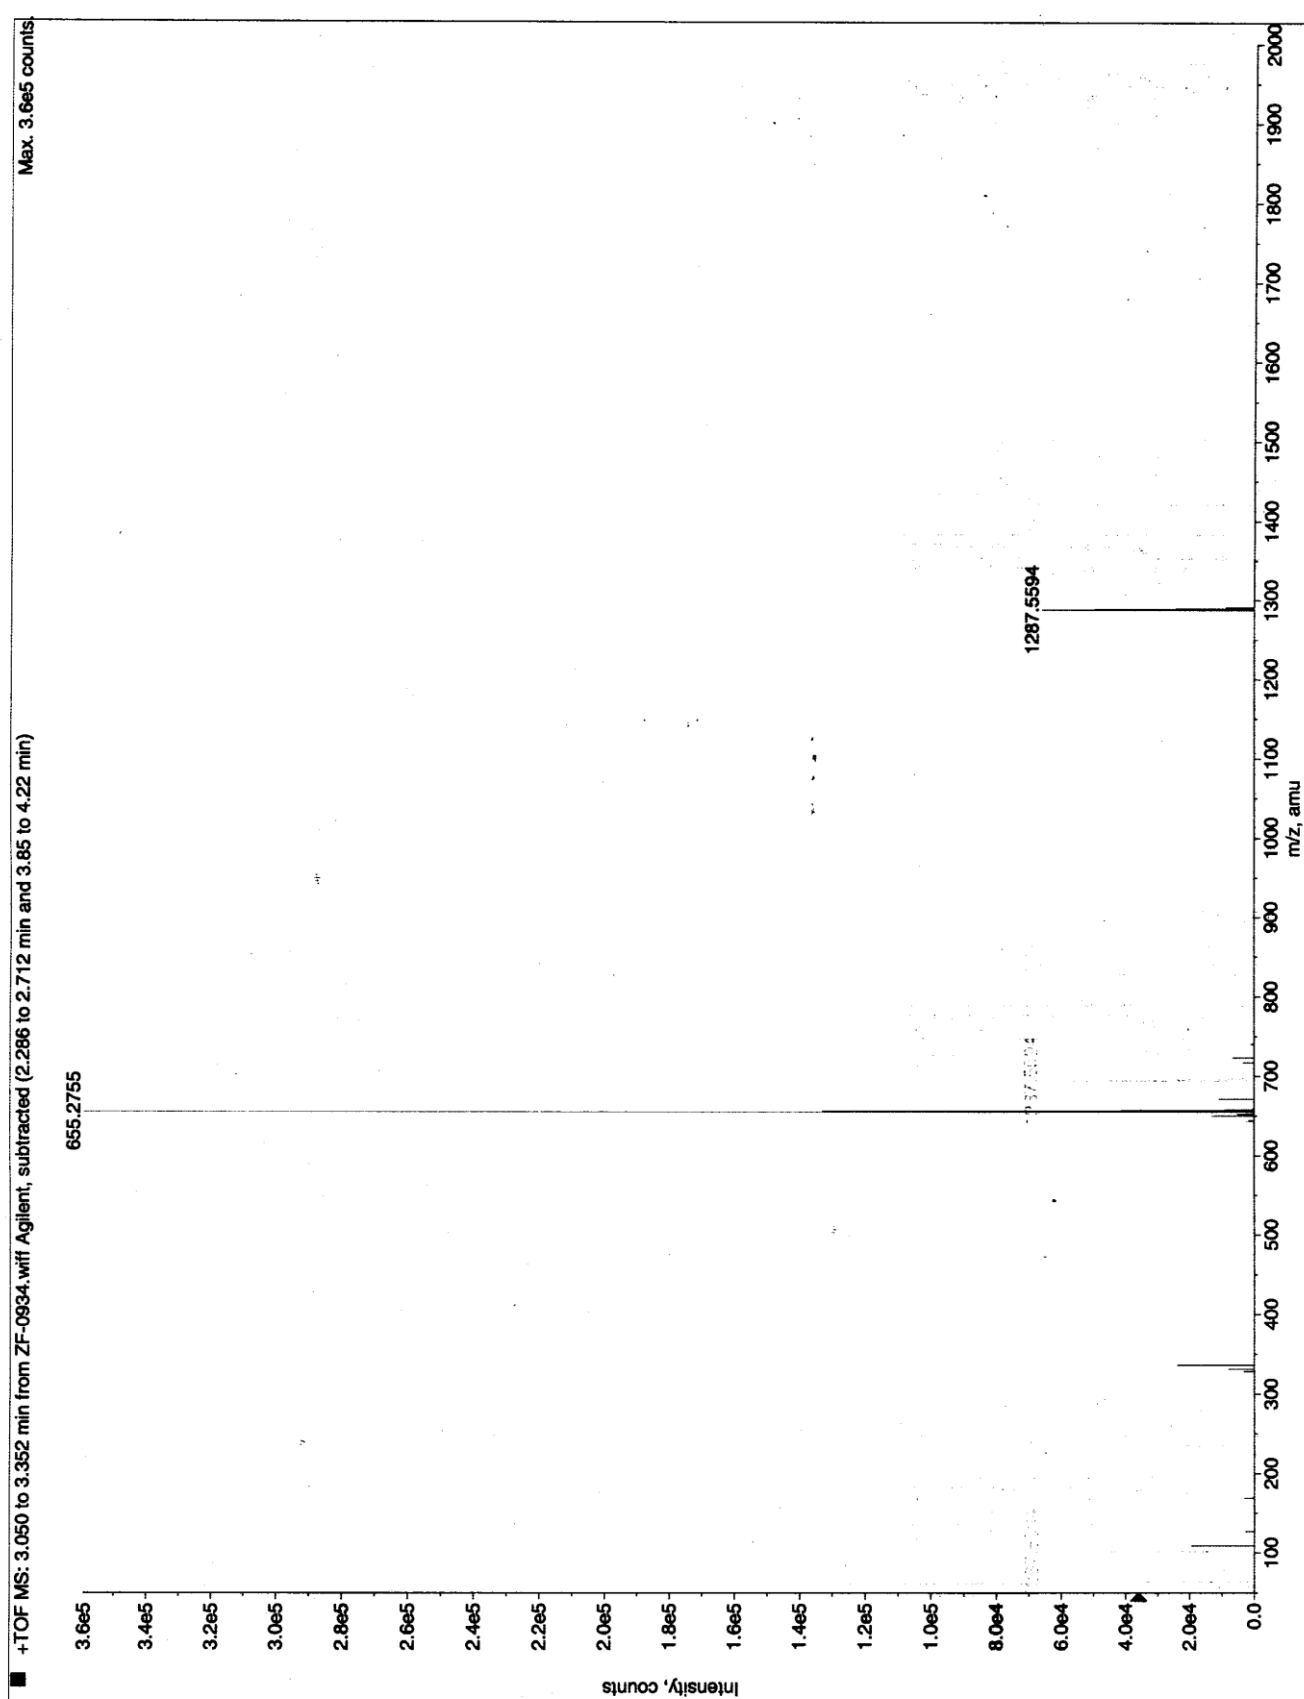

Figure 15.  $^1\text{H}$ -NMR of compound 3d.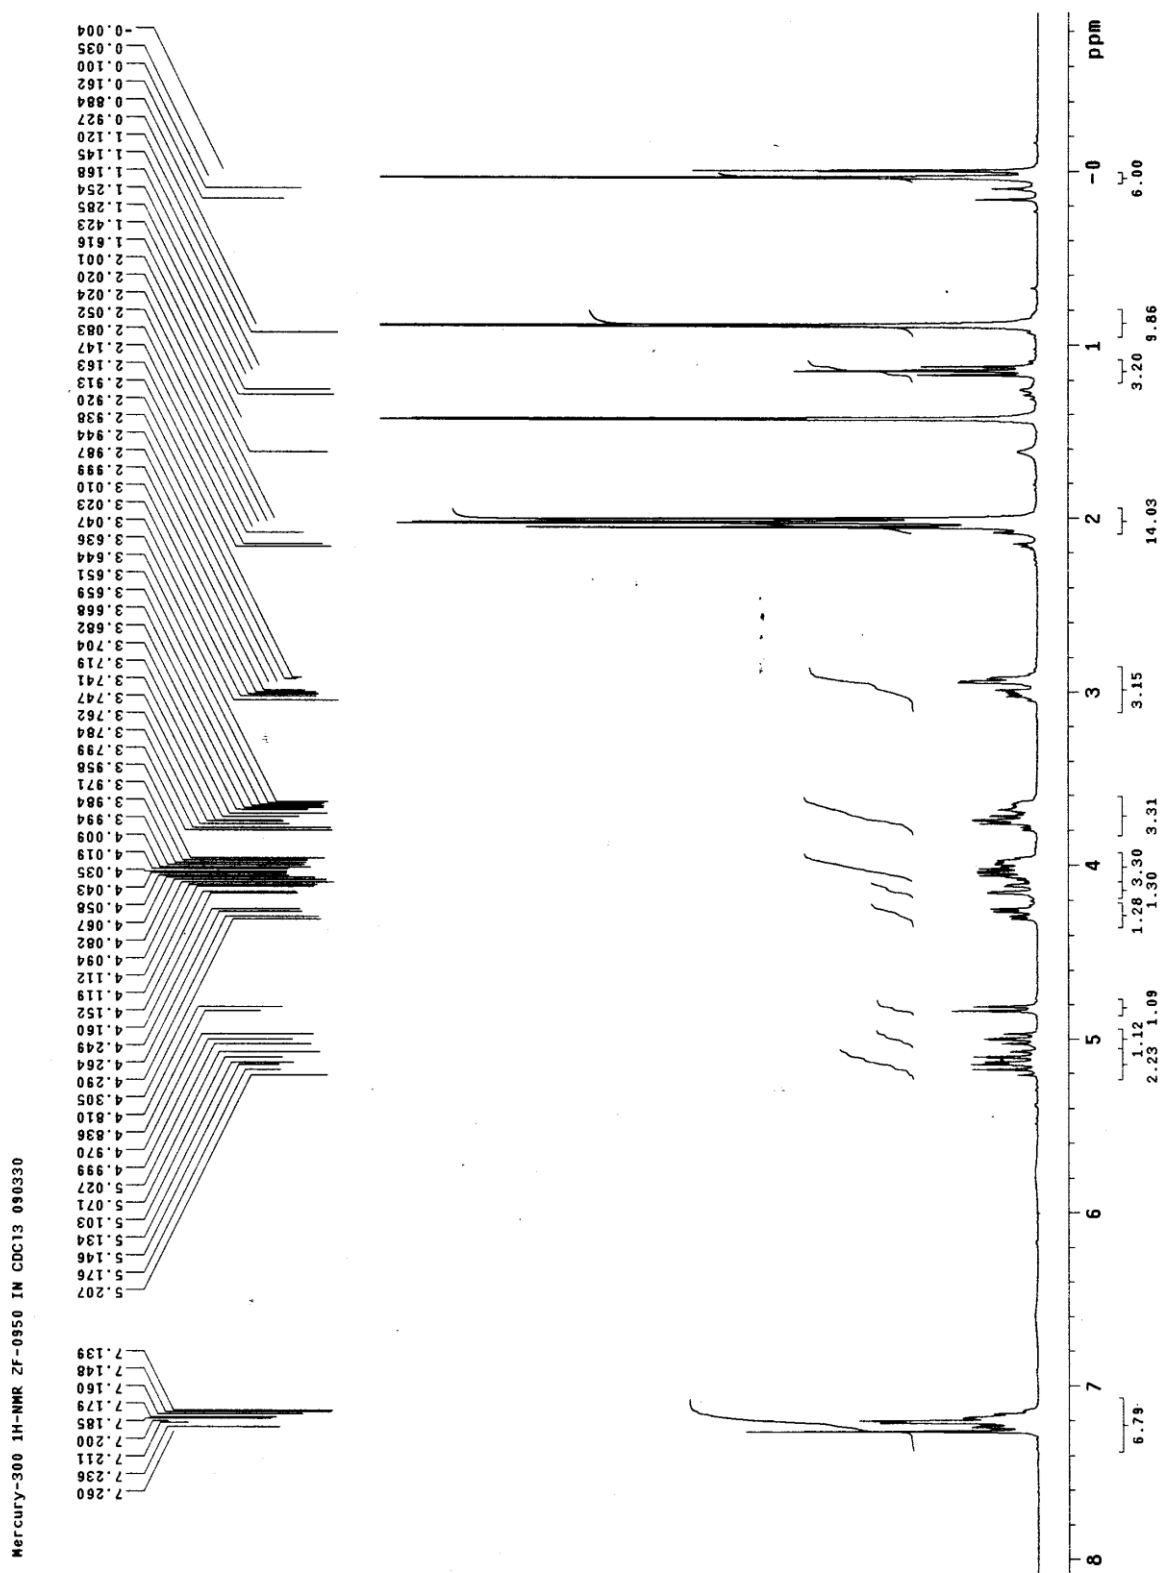

Figure 16. HRMS of compound 3d.

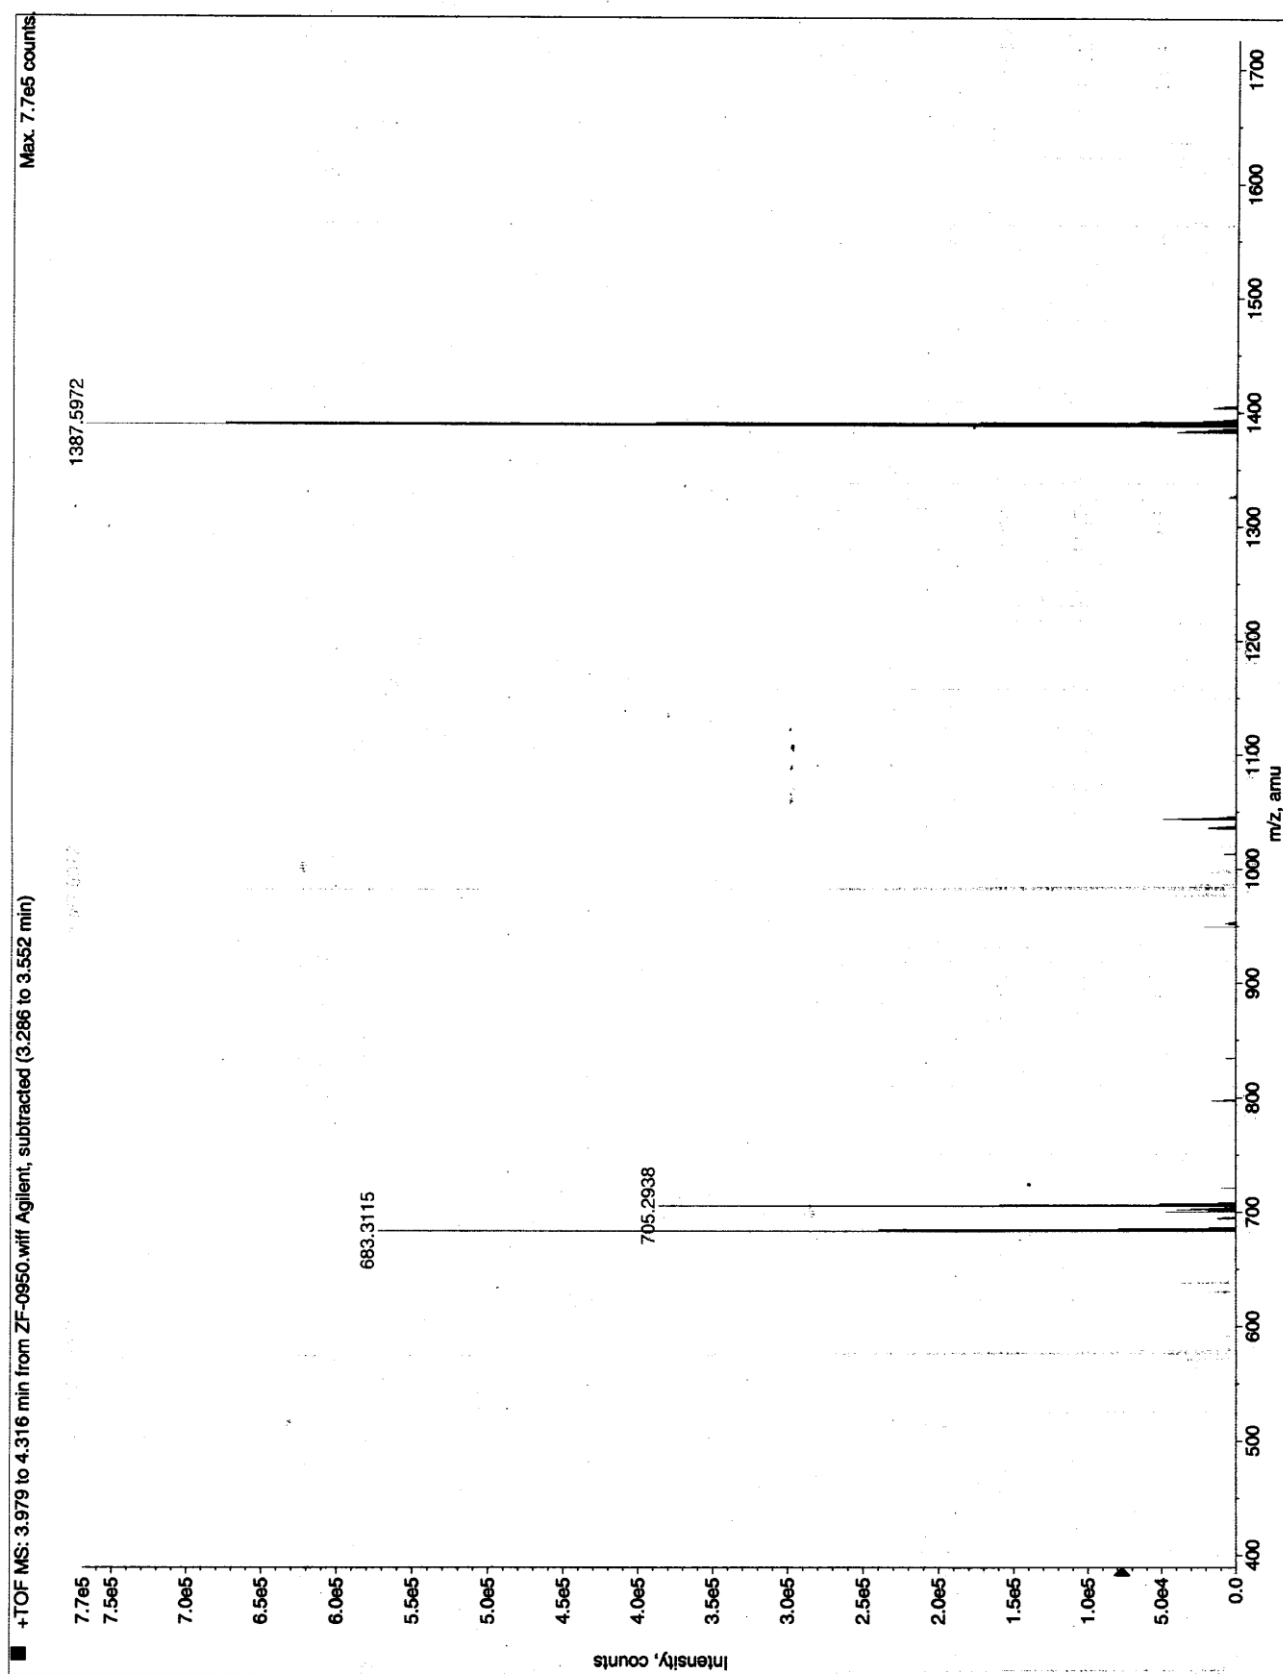

Figure 17.  $^1\text{H}$ -NMR of compound 3e.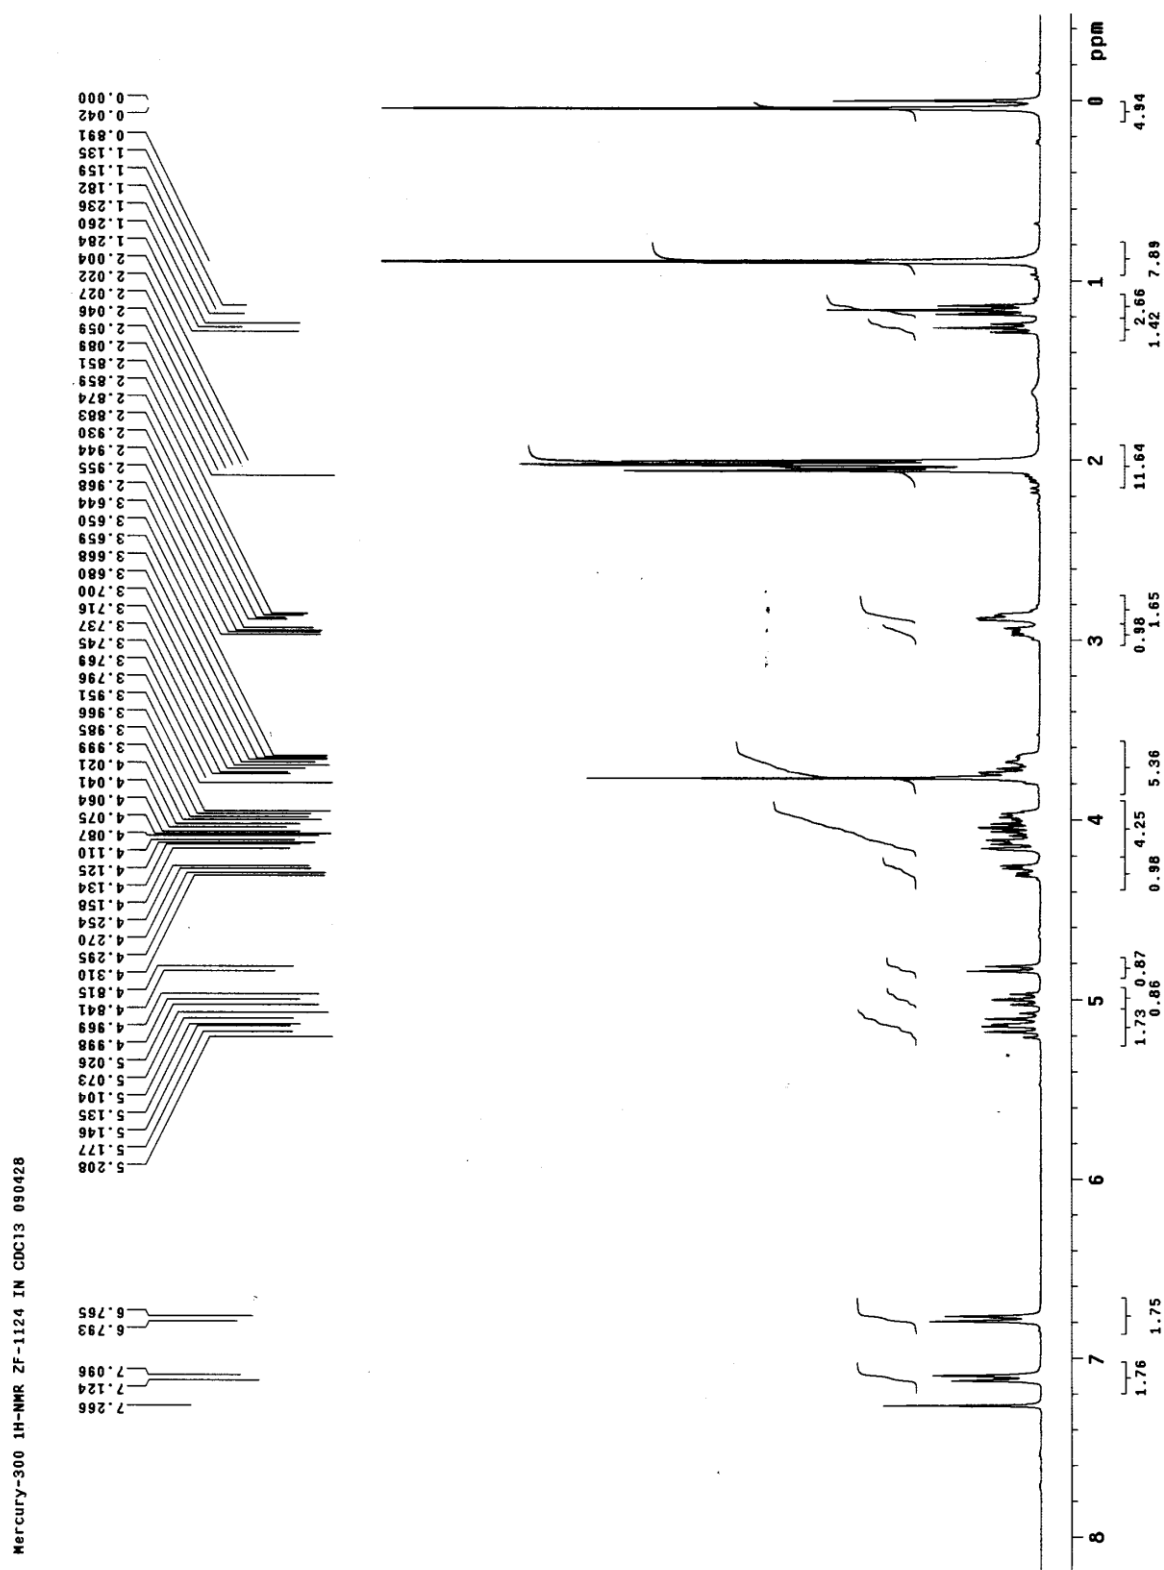

Figure 18. HRMS of compound 3e.

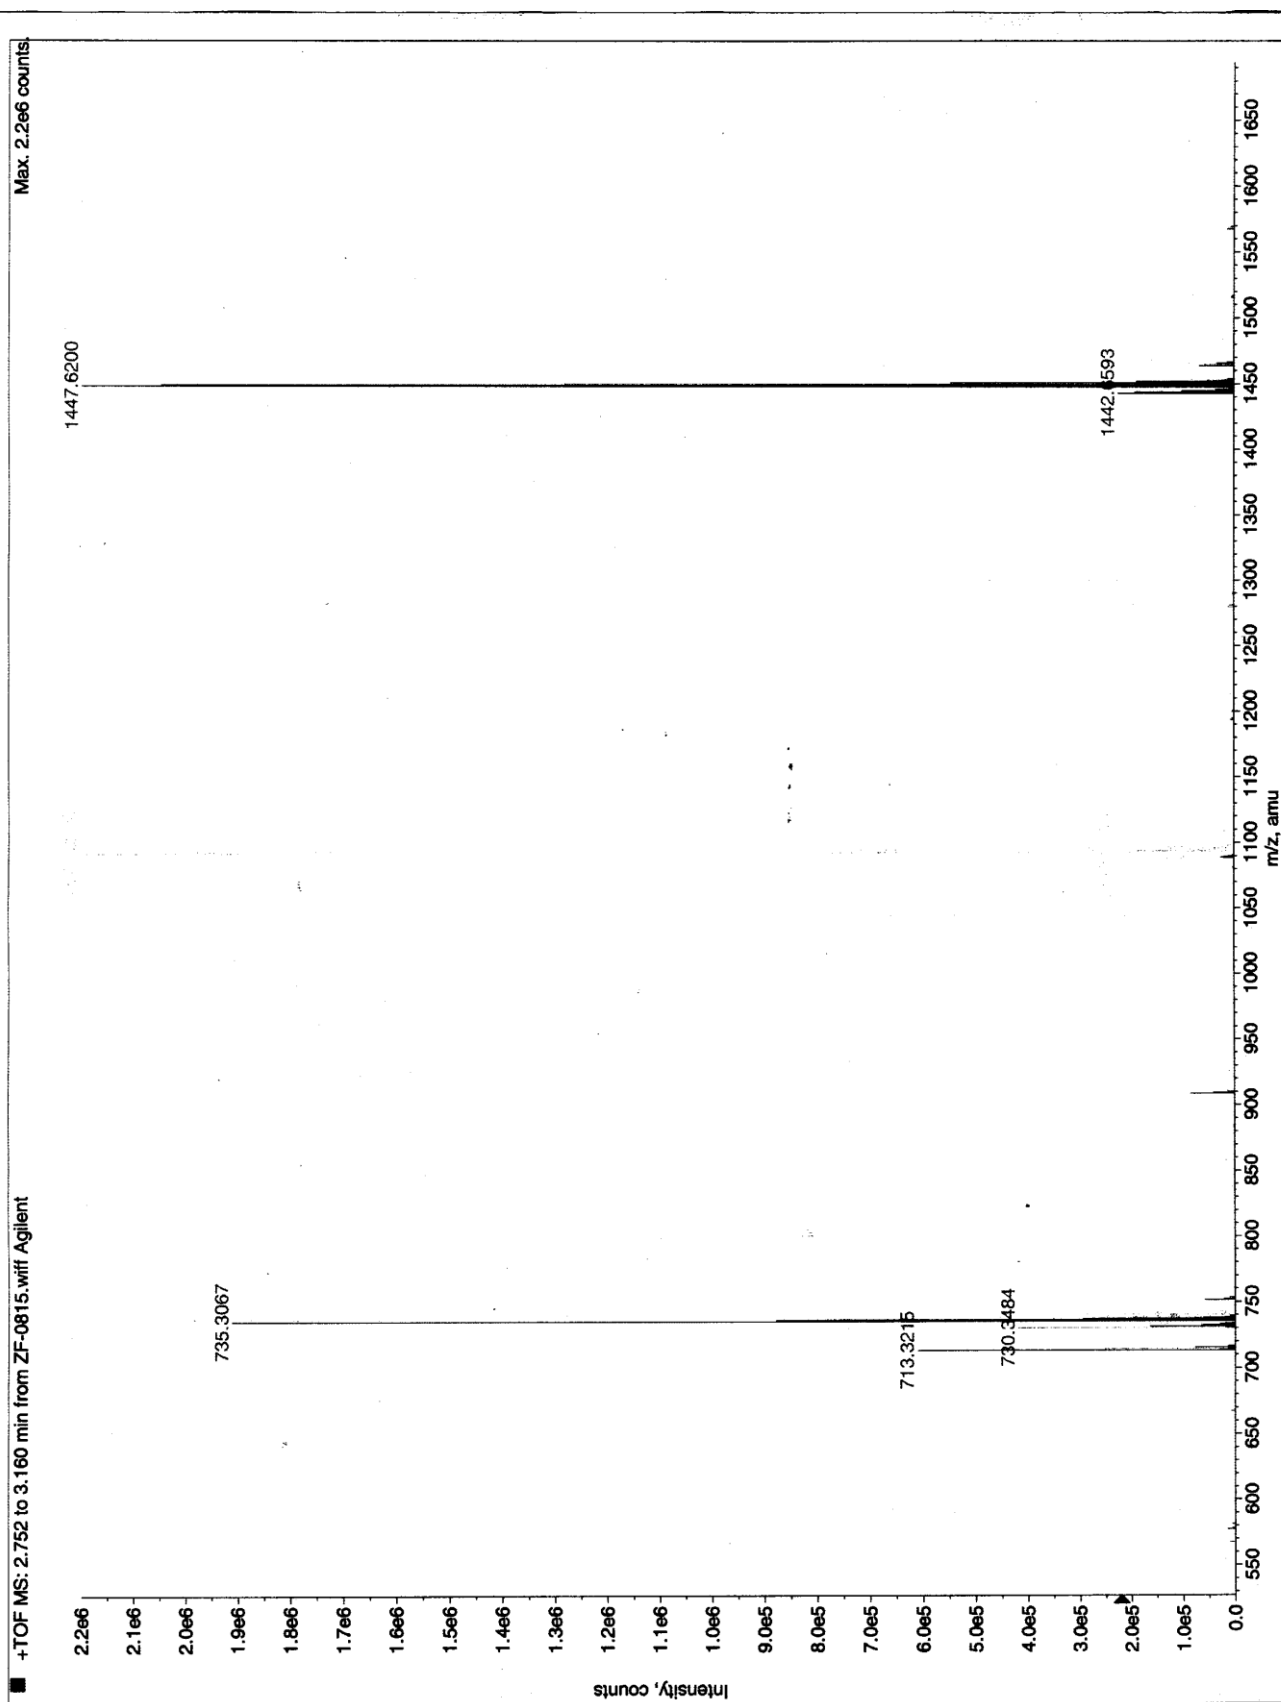

Figure 19.  $^1\text{H}$ -NMR of compound 4a.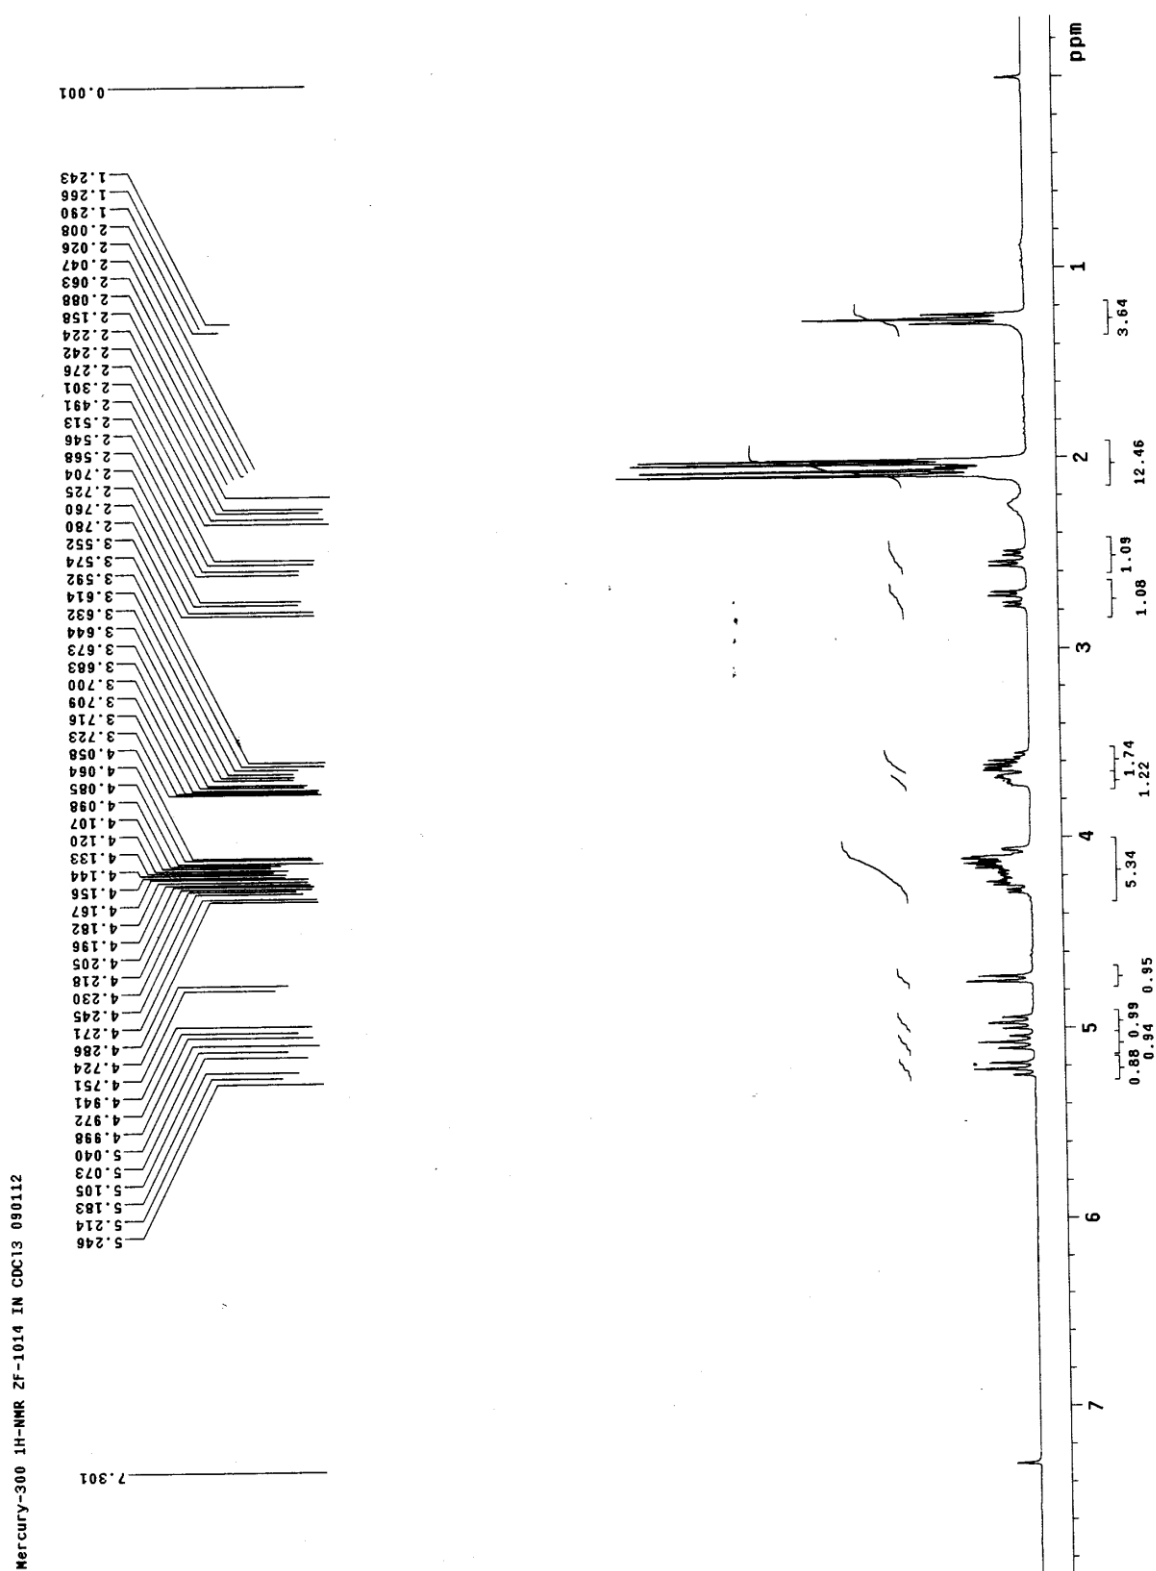

Figure 20. HRMS of compound 4a.

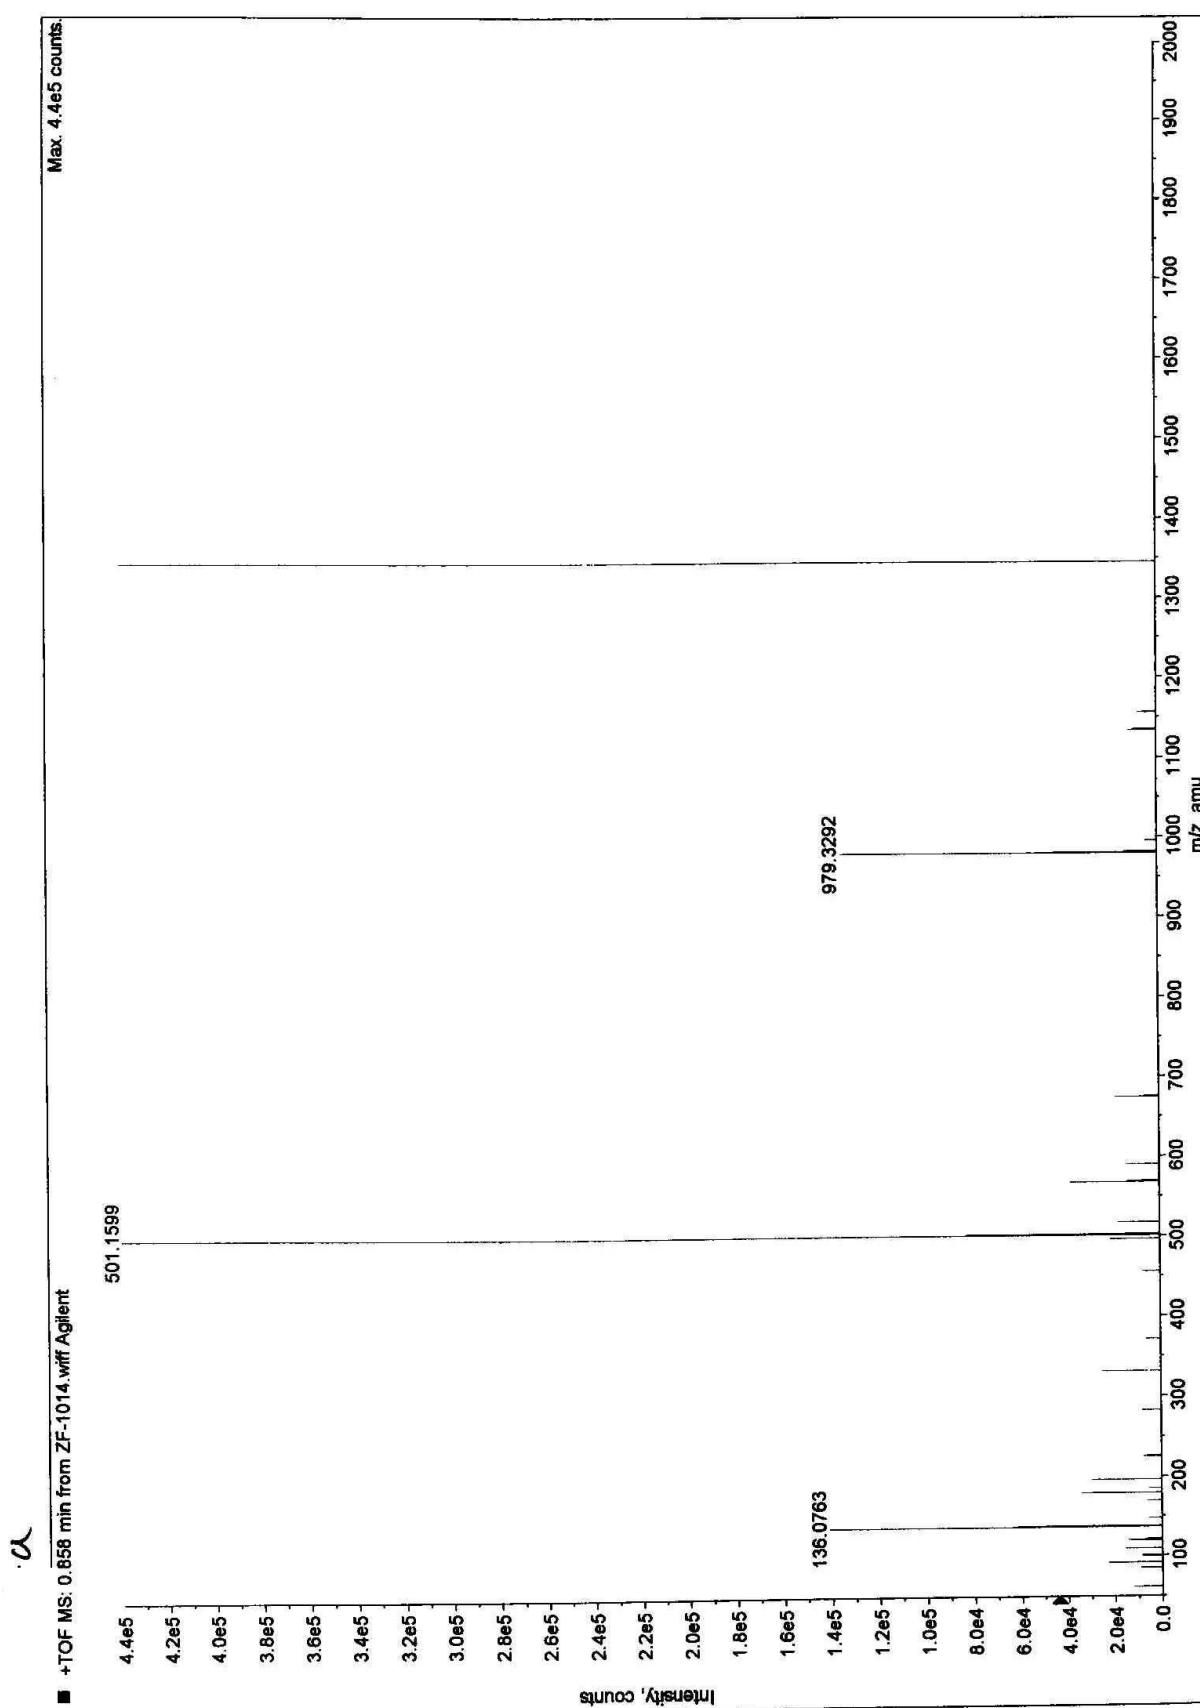



Figure 21.  $^1\text{H}$ -NMR of compound 4b.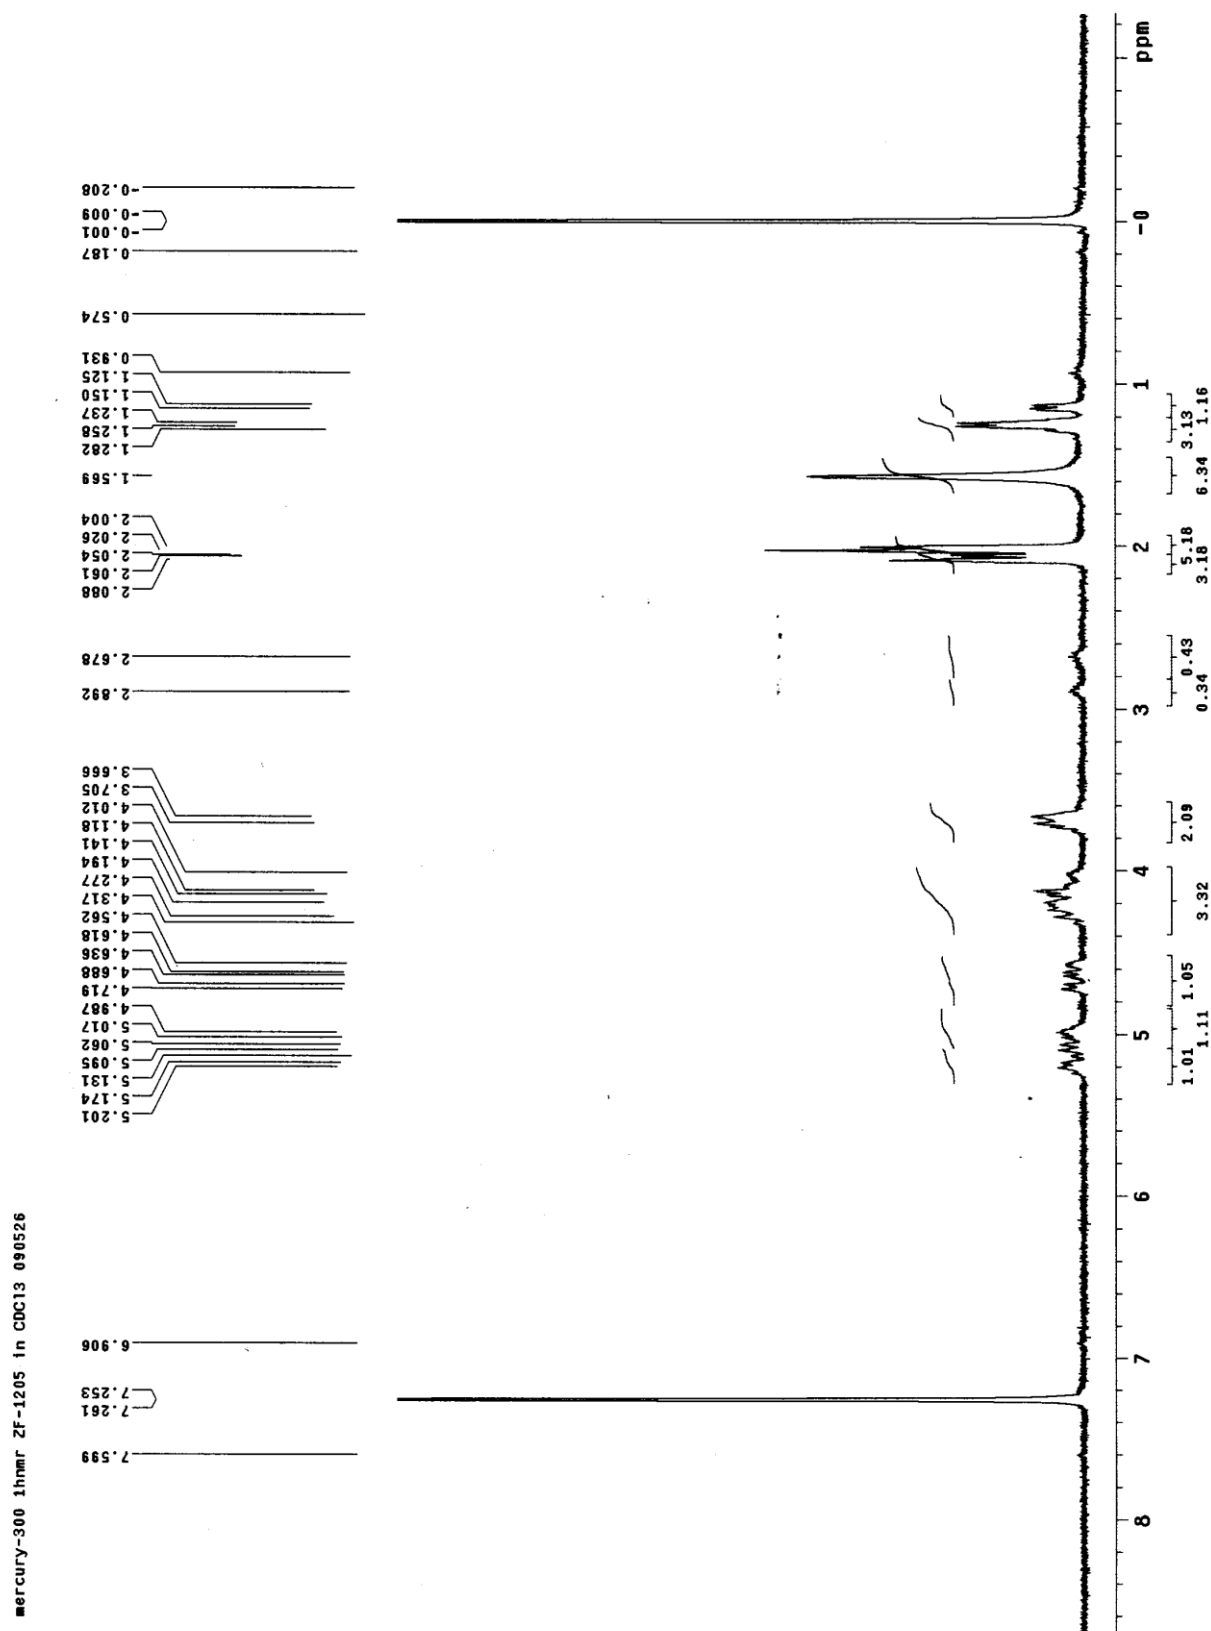

Figure 22. HRMS of compound 4b.

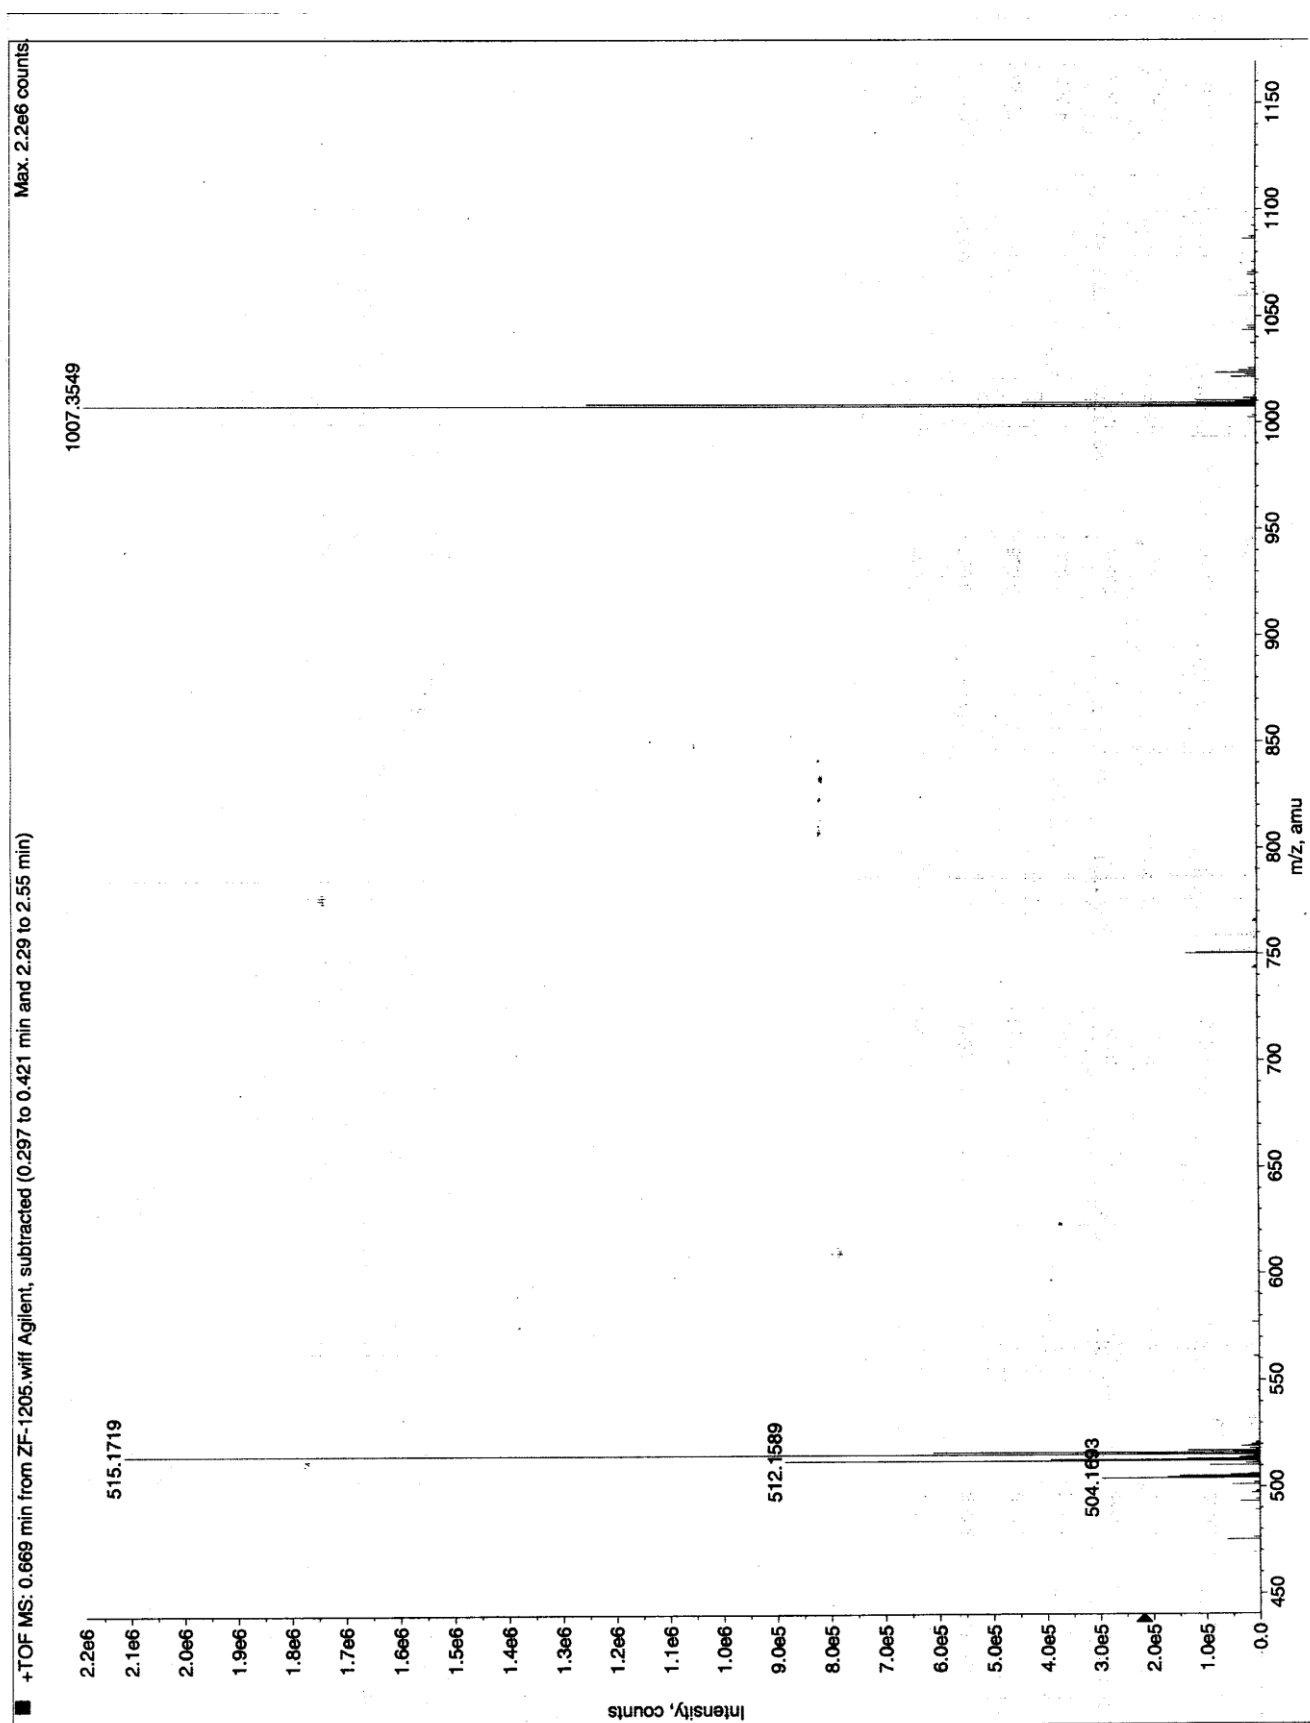

Figure 23.  $^1\text{H}$ -NMR of compound 4c.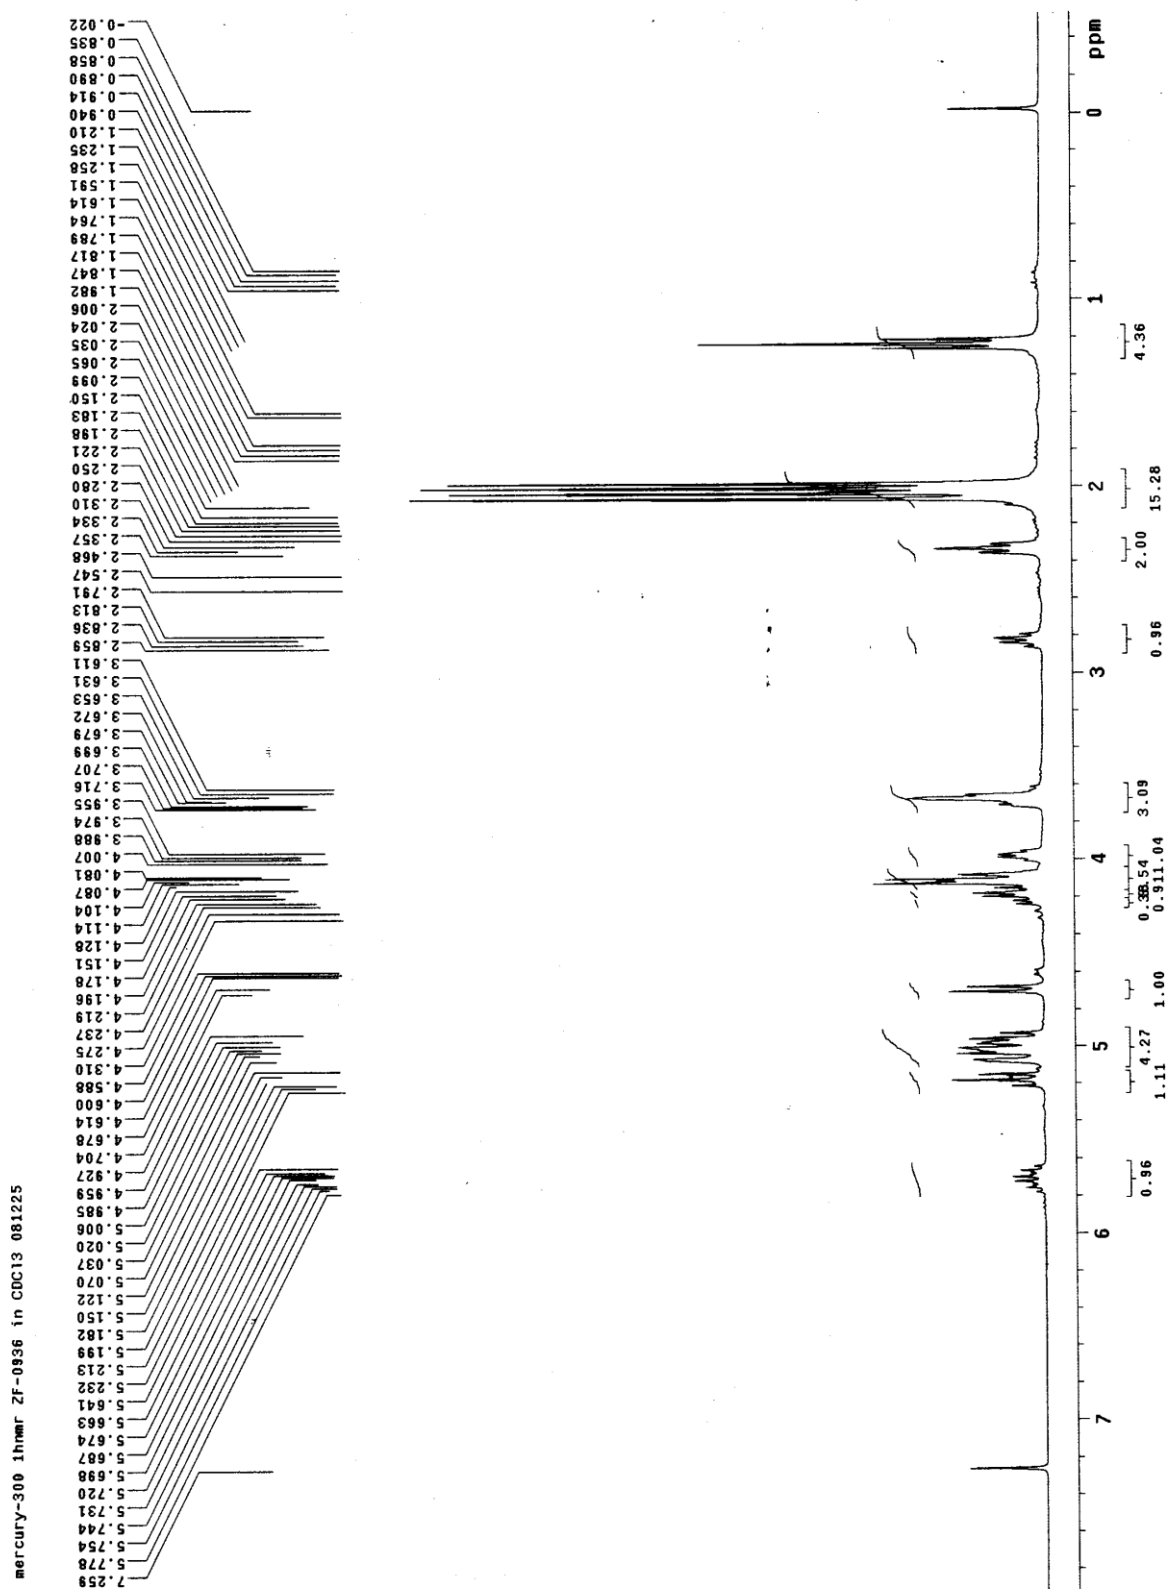

Figure 24. HRMS of compound 4c.

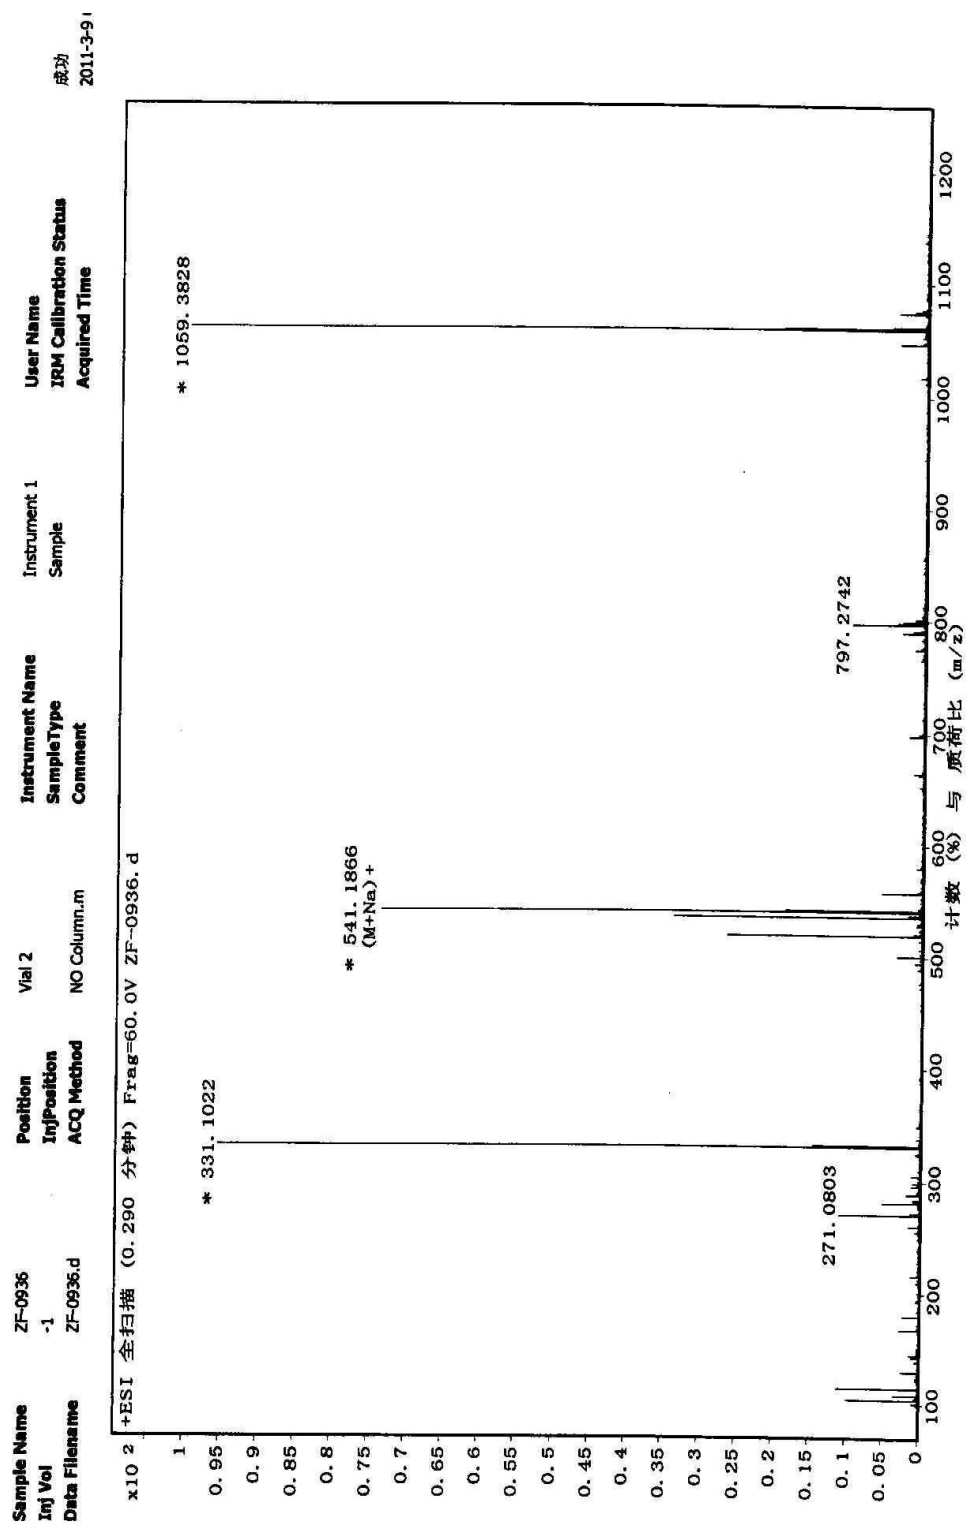

Figure 25.  $^1\text{H}$ -NMR of compound 4d.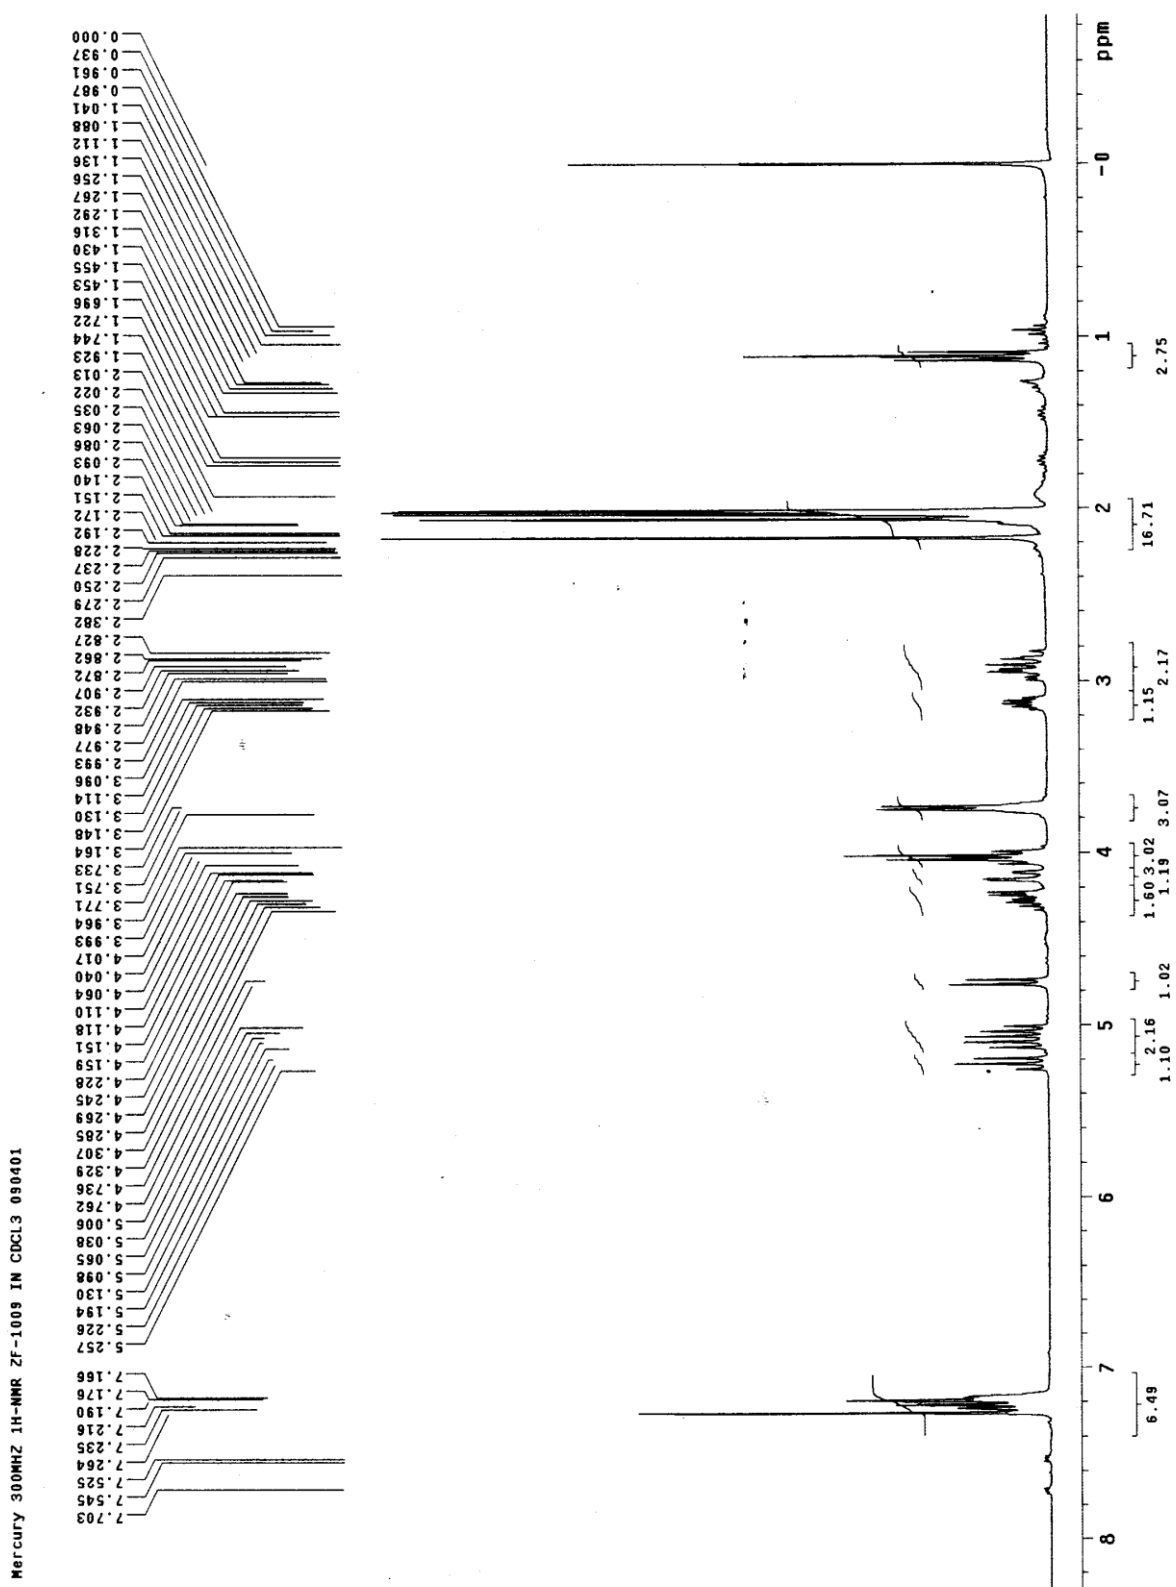

Figure 26. HRMS of compound 4d.

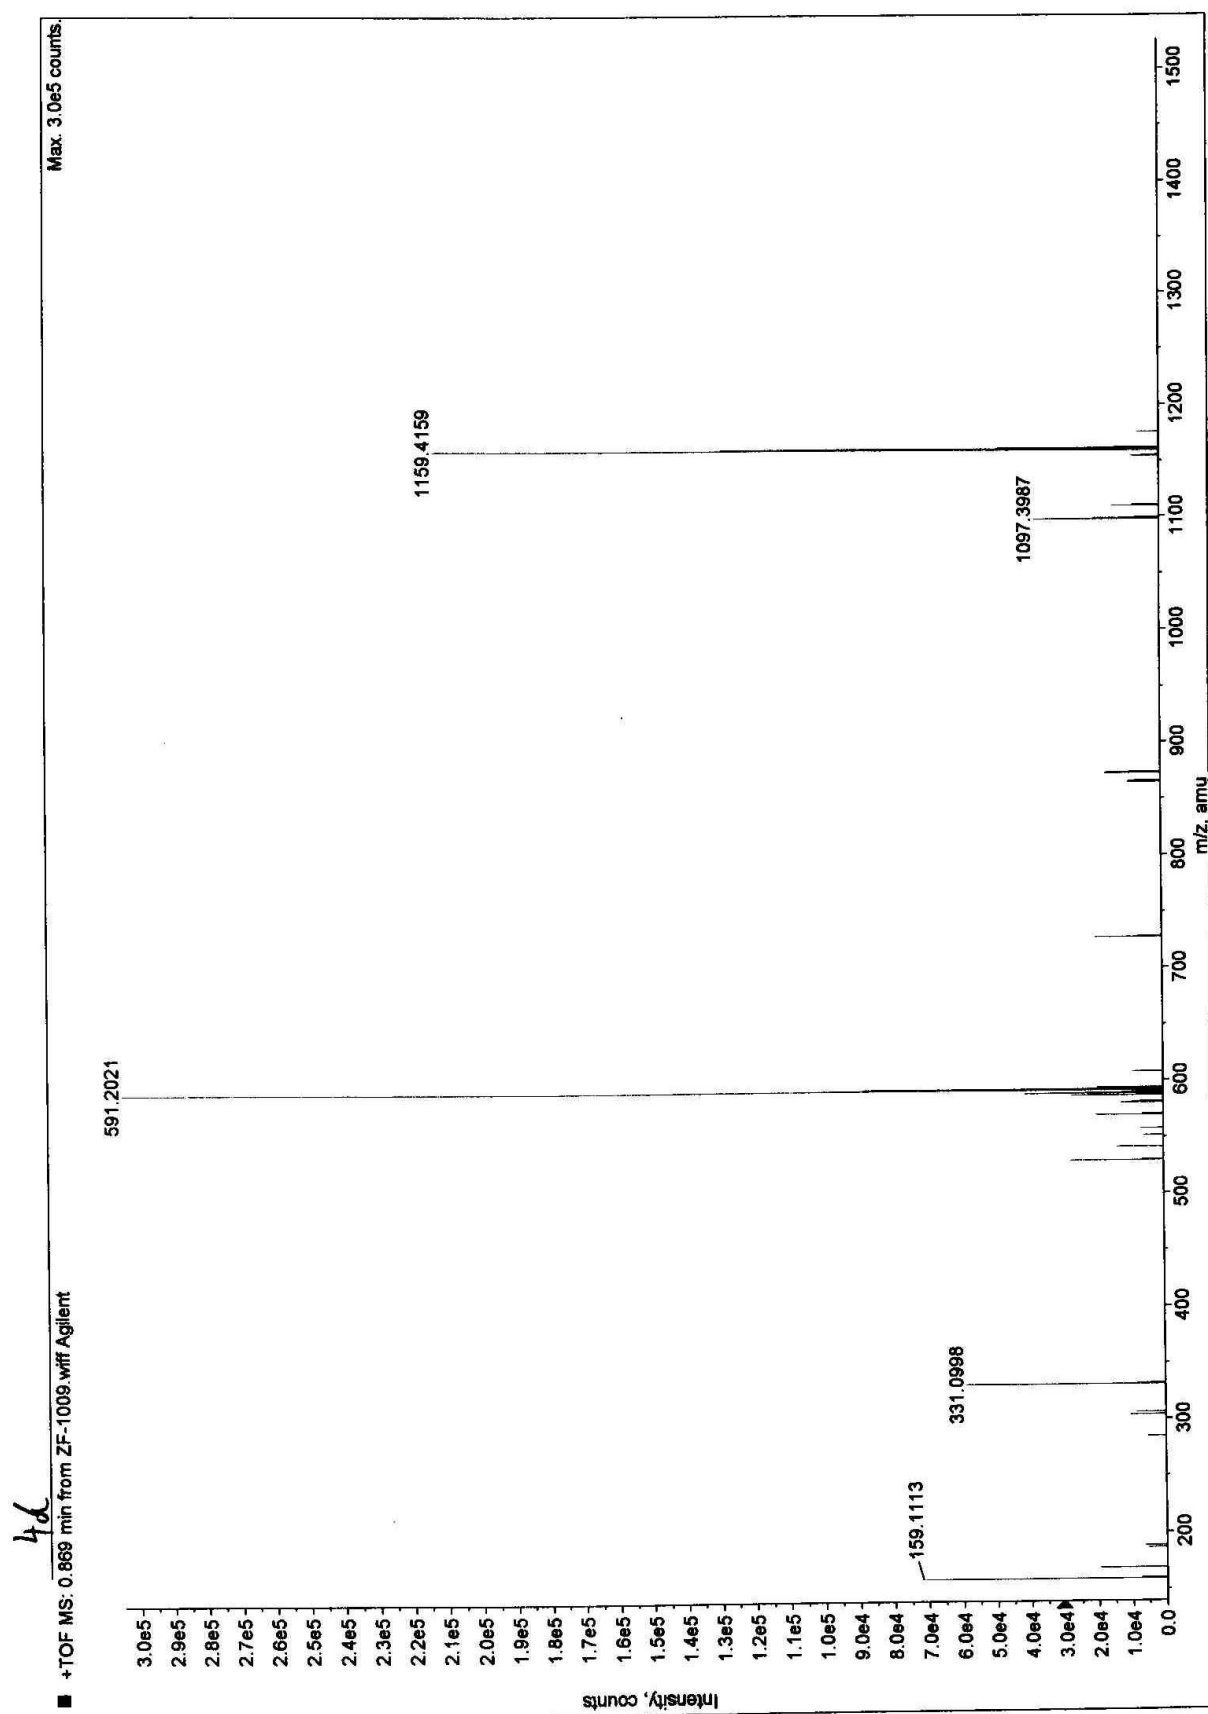

Figure 27.  $^1\text{H}$ -NMR of compound 4e.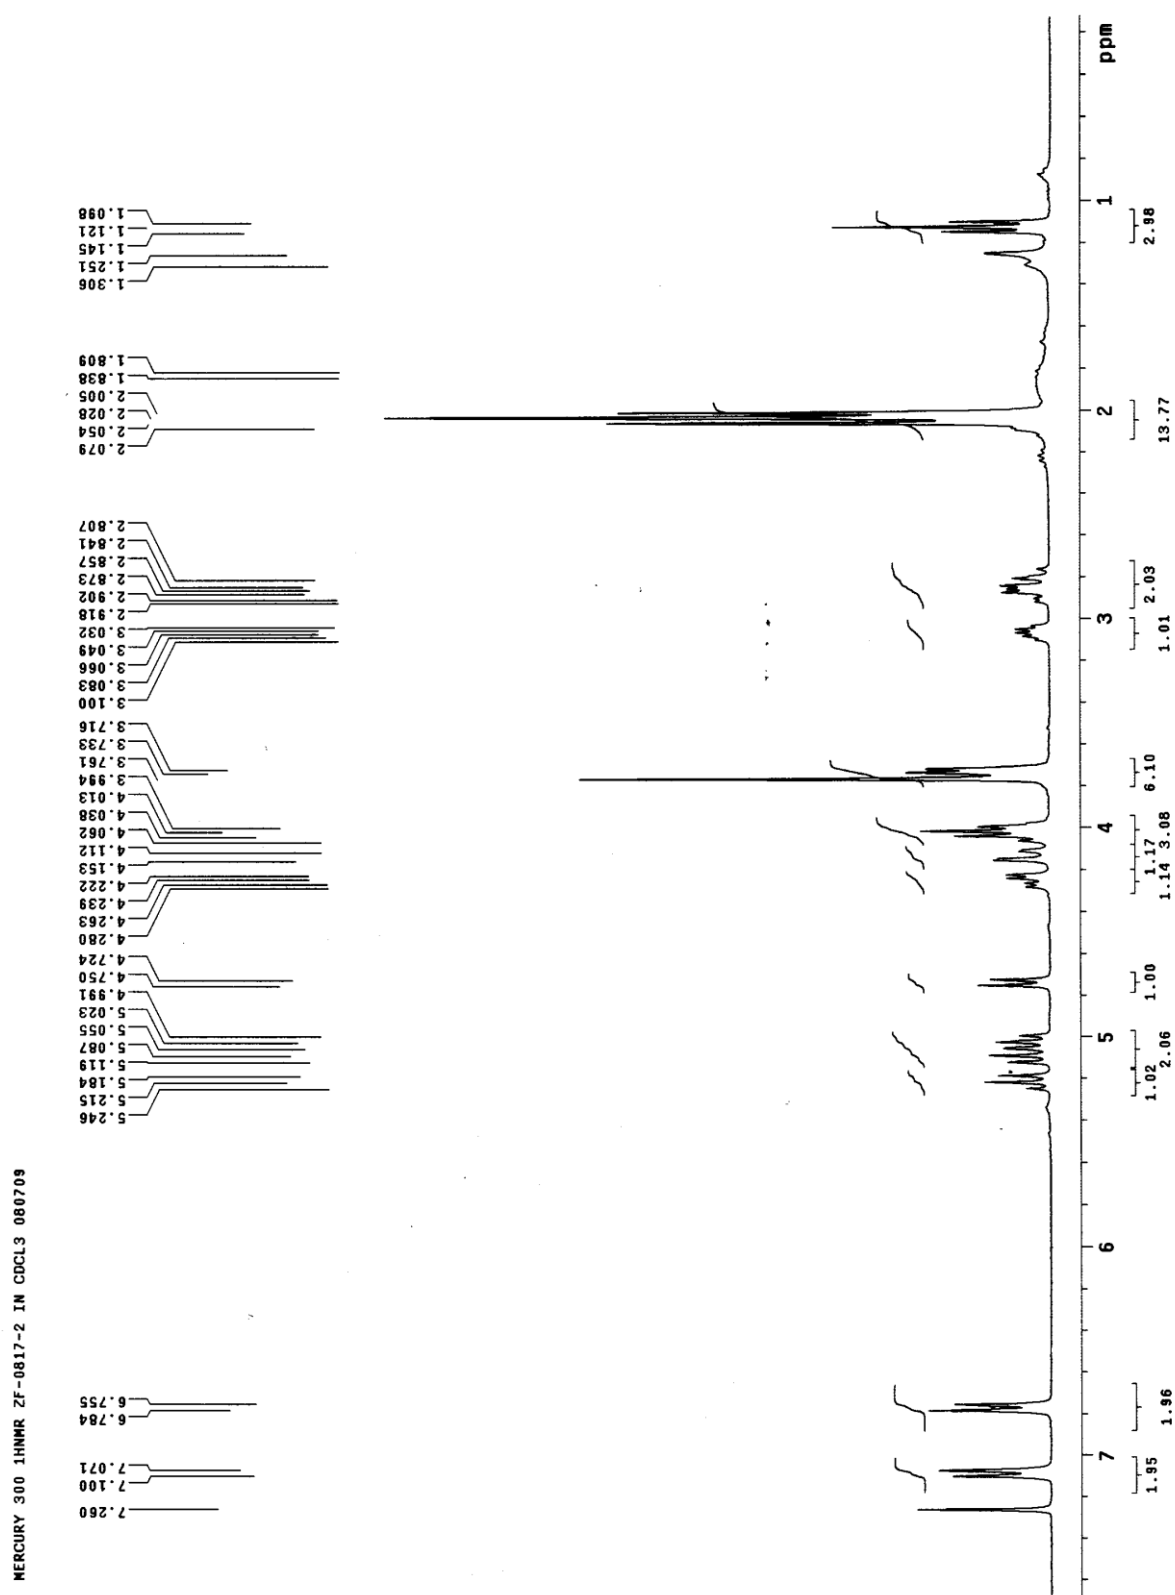

Figure 28. HRMS of compound 4e.

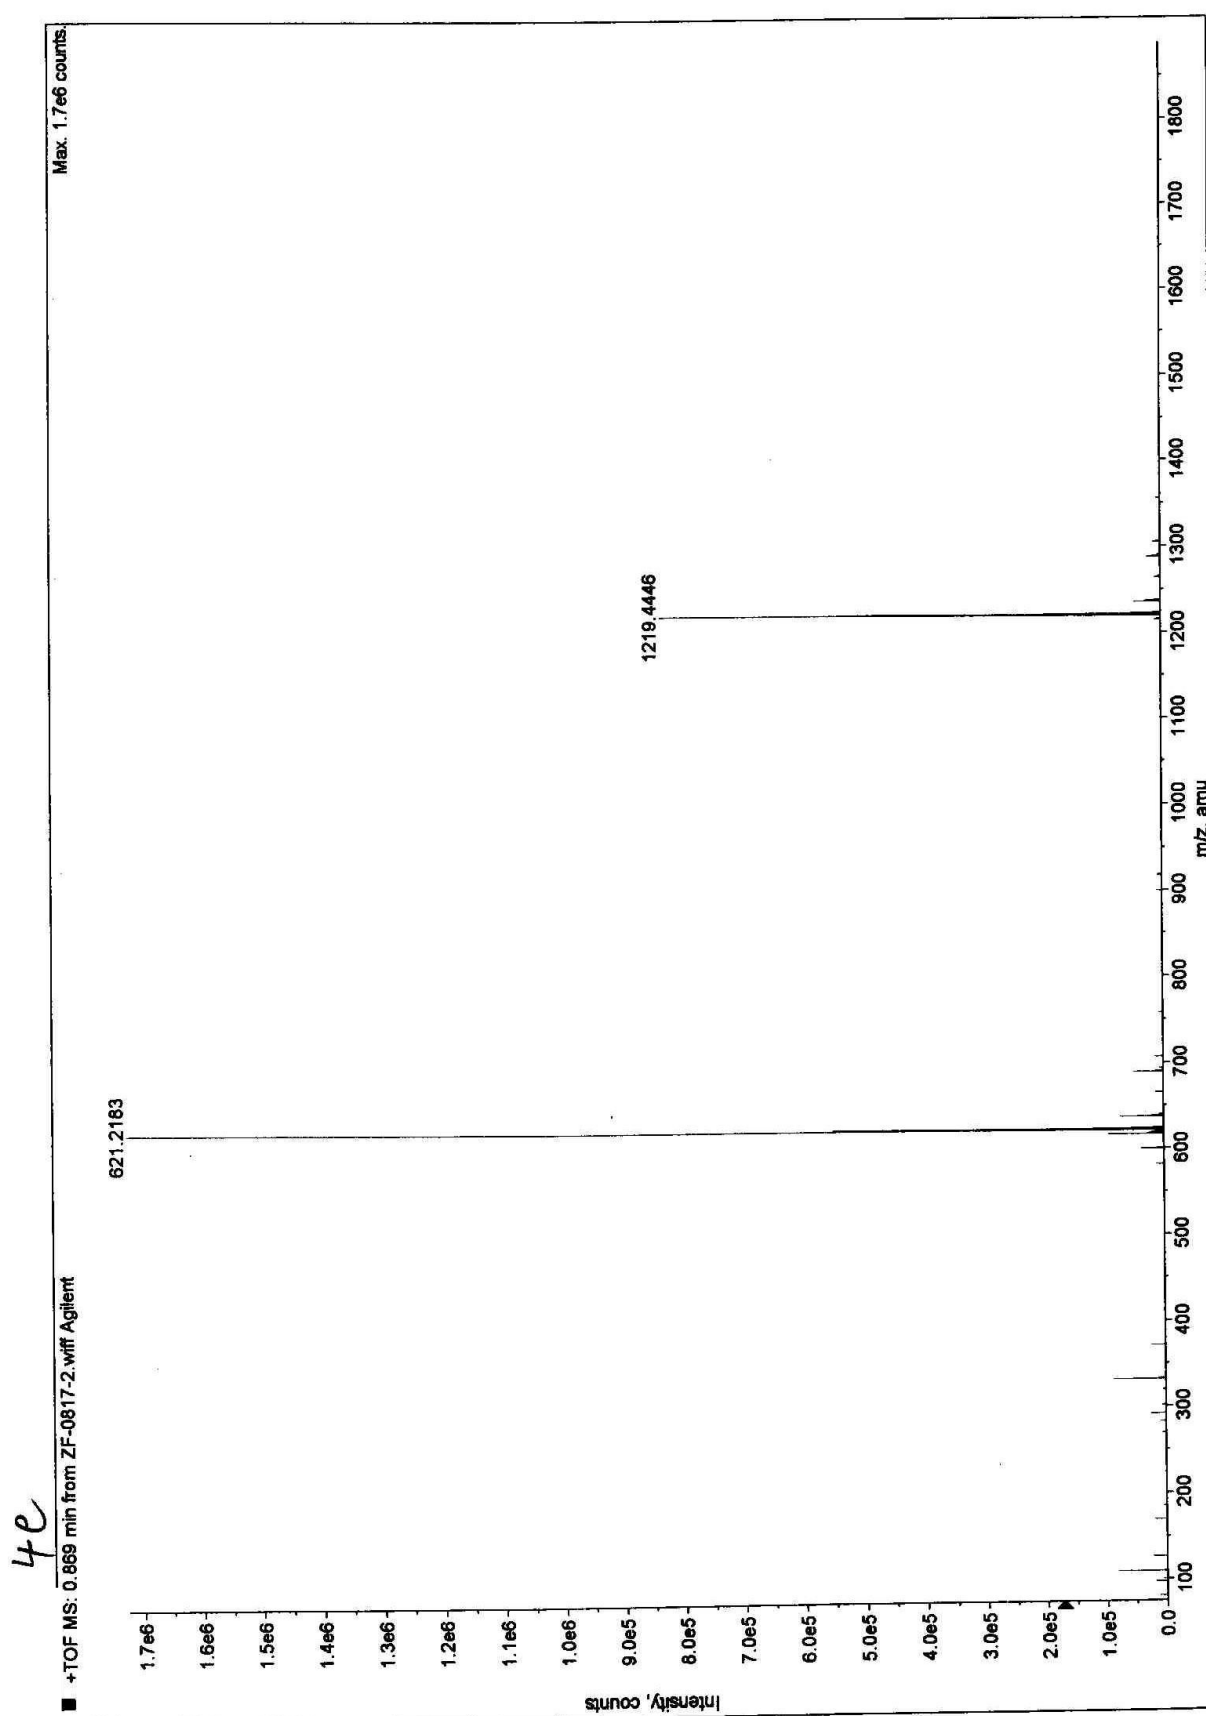



Figure 29.  $^1\text{H}$ -NMR of compound 5a.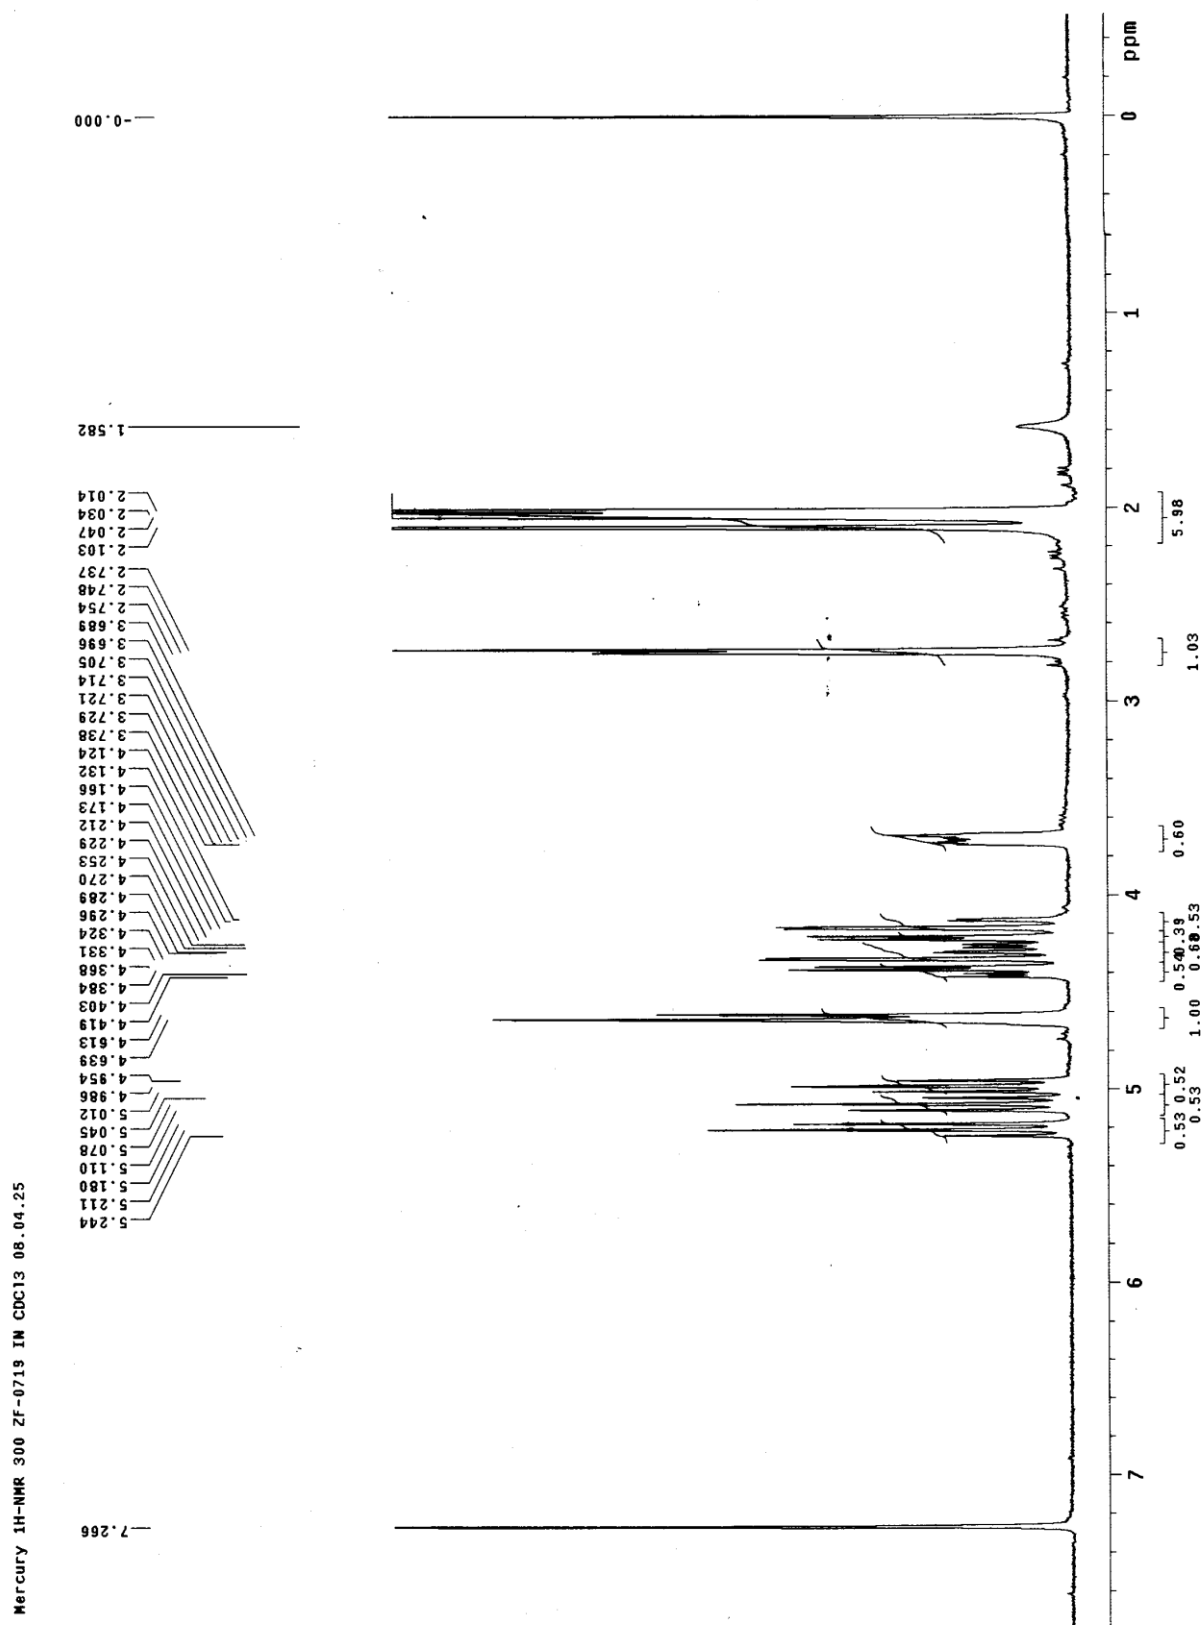

Figure 30. HRMS of compound 5a.

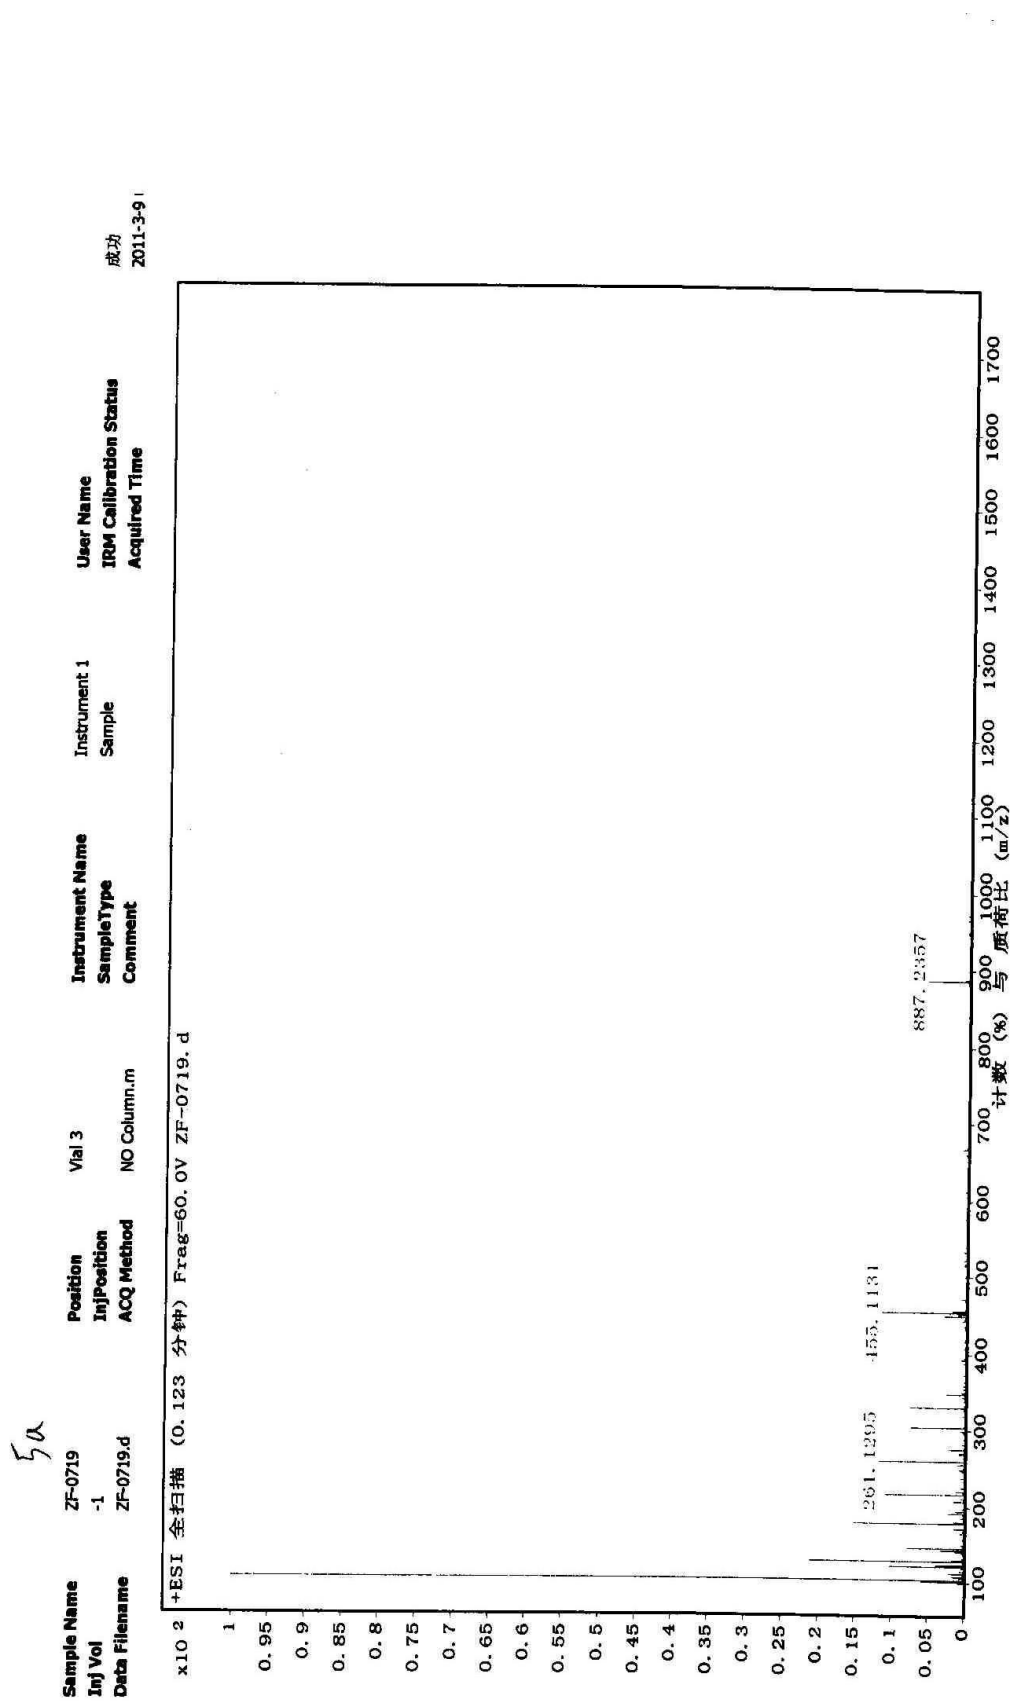

Figure 31.  $^1\text{H}$ -NMR of compound 5b.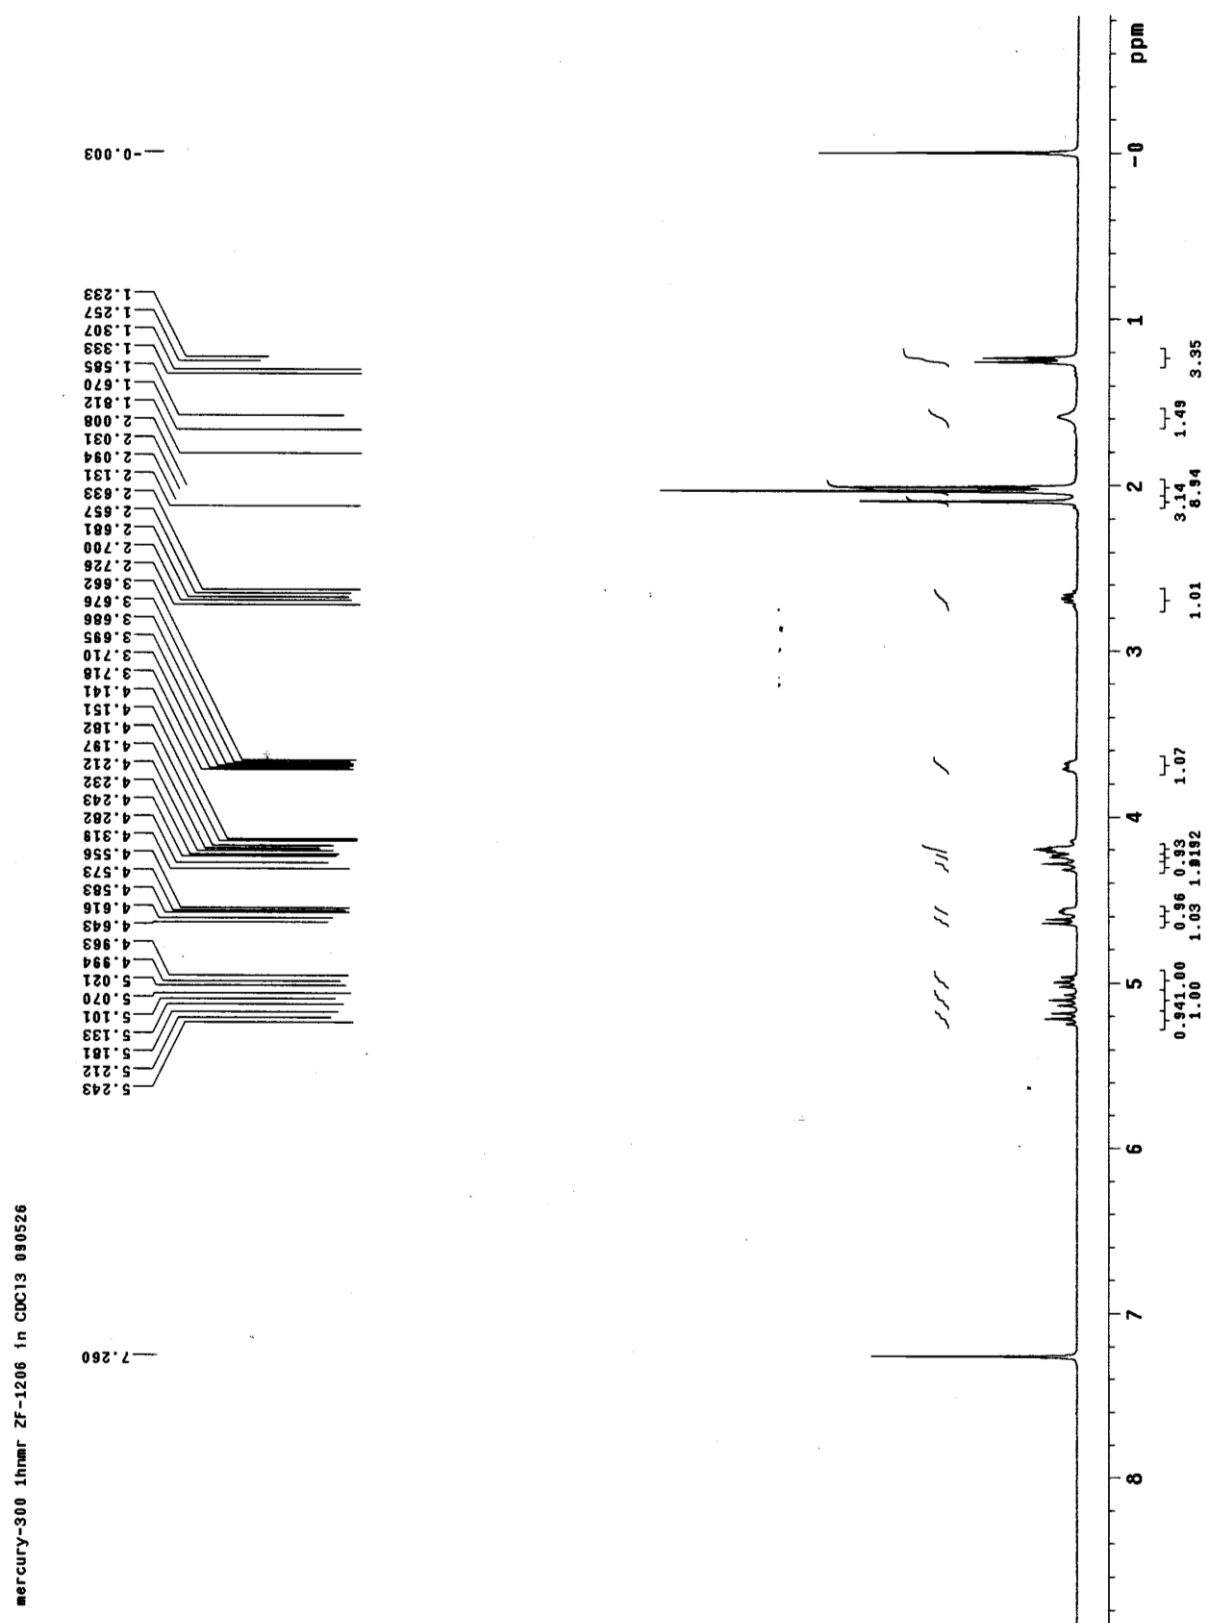

Figure 32.  $^{13}\text{C}$ -NMR of compound 5b.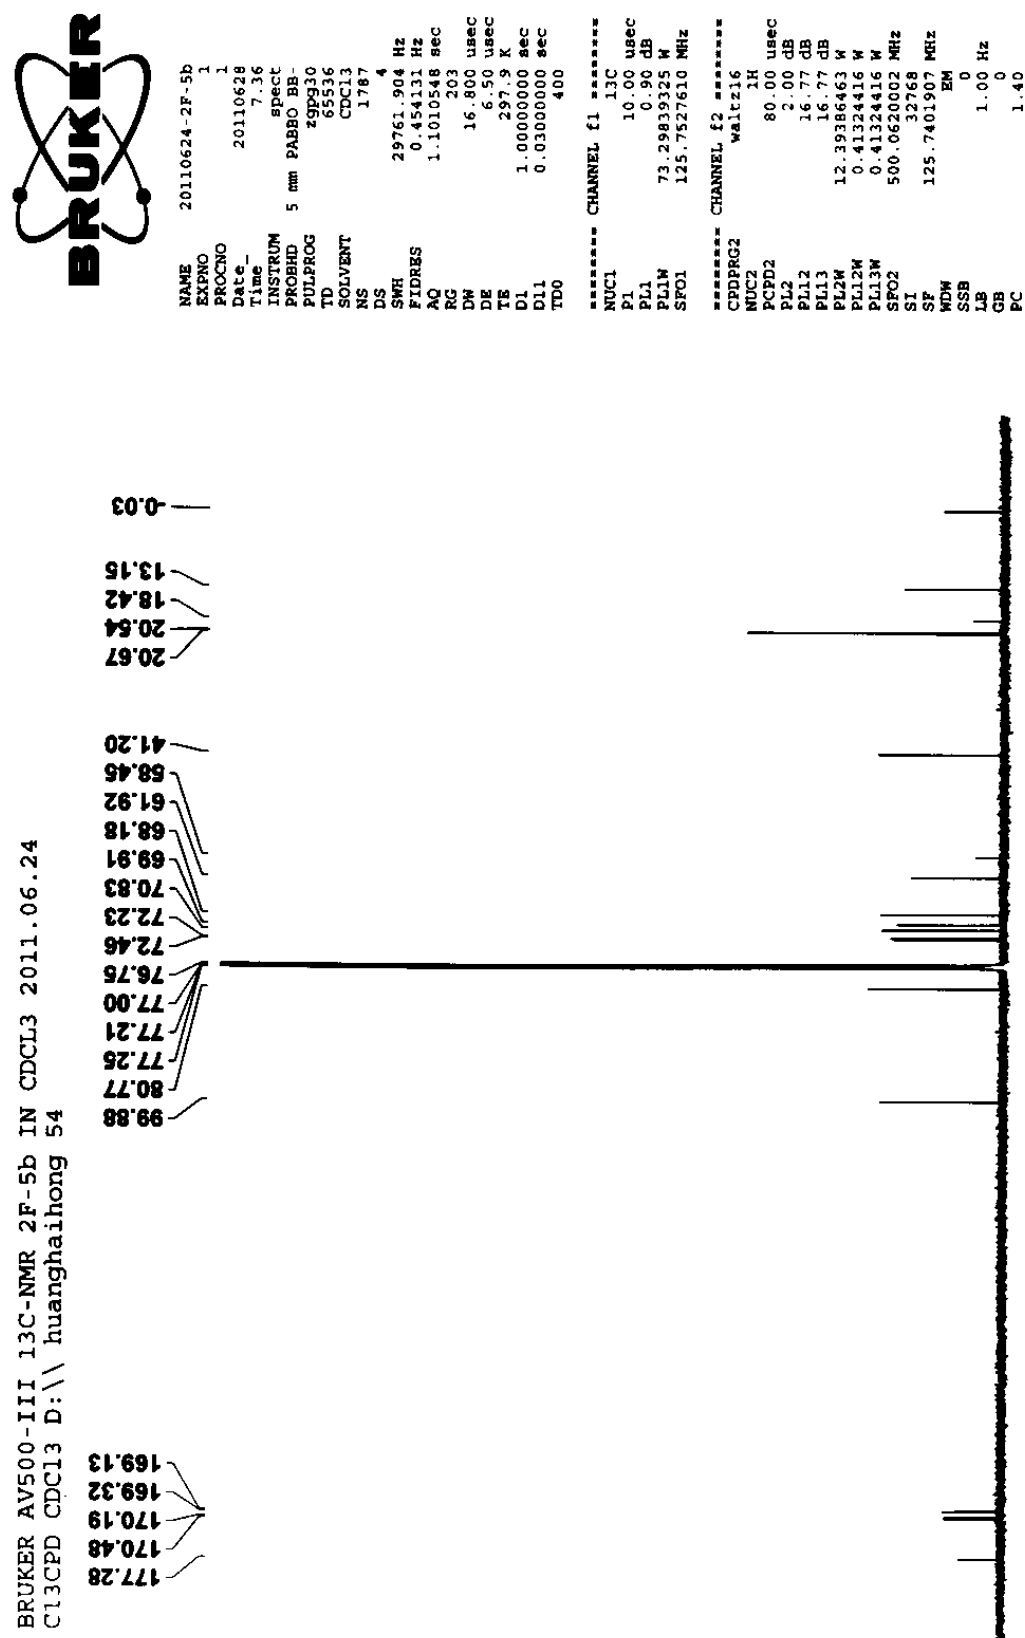

Figure 33. HRMS of compound 5b.

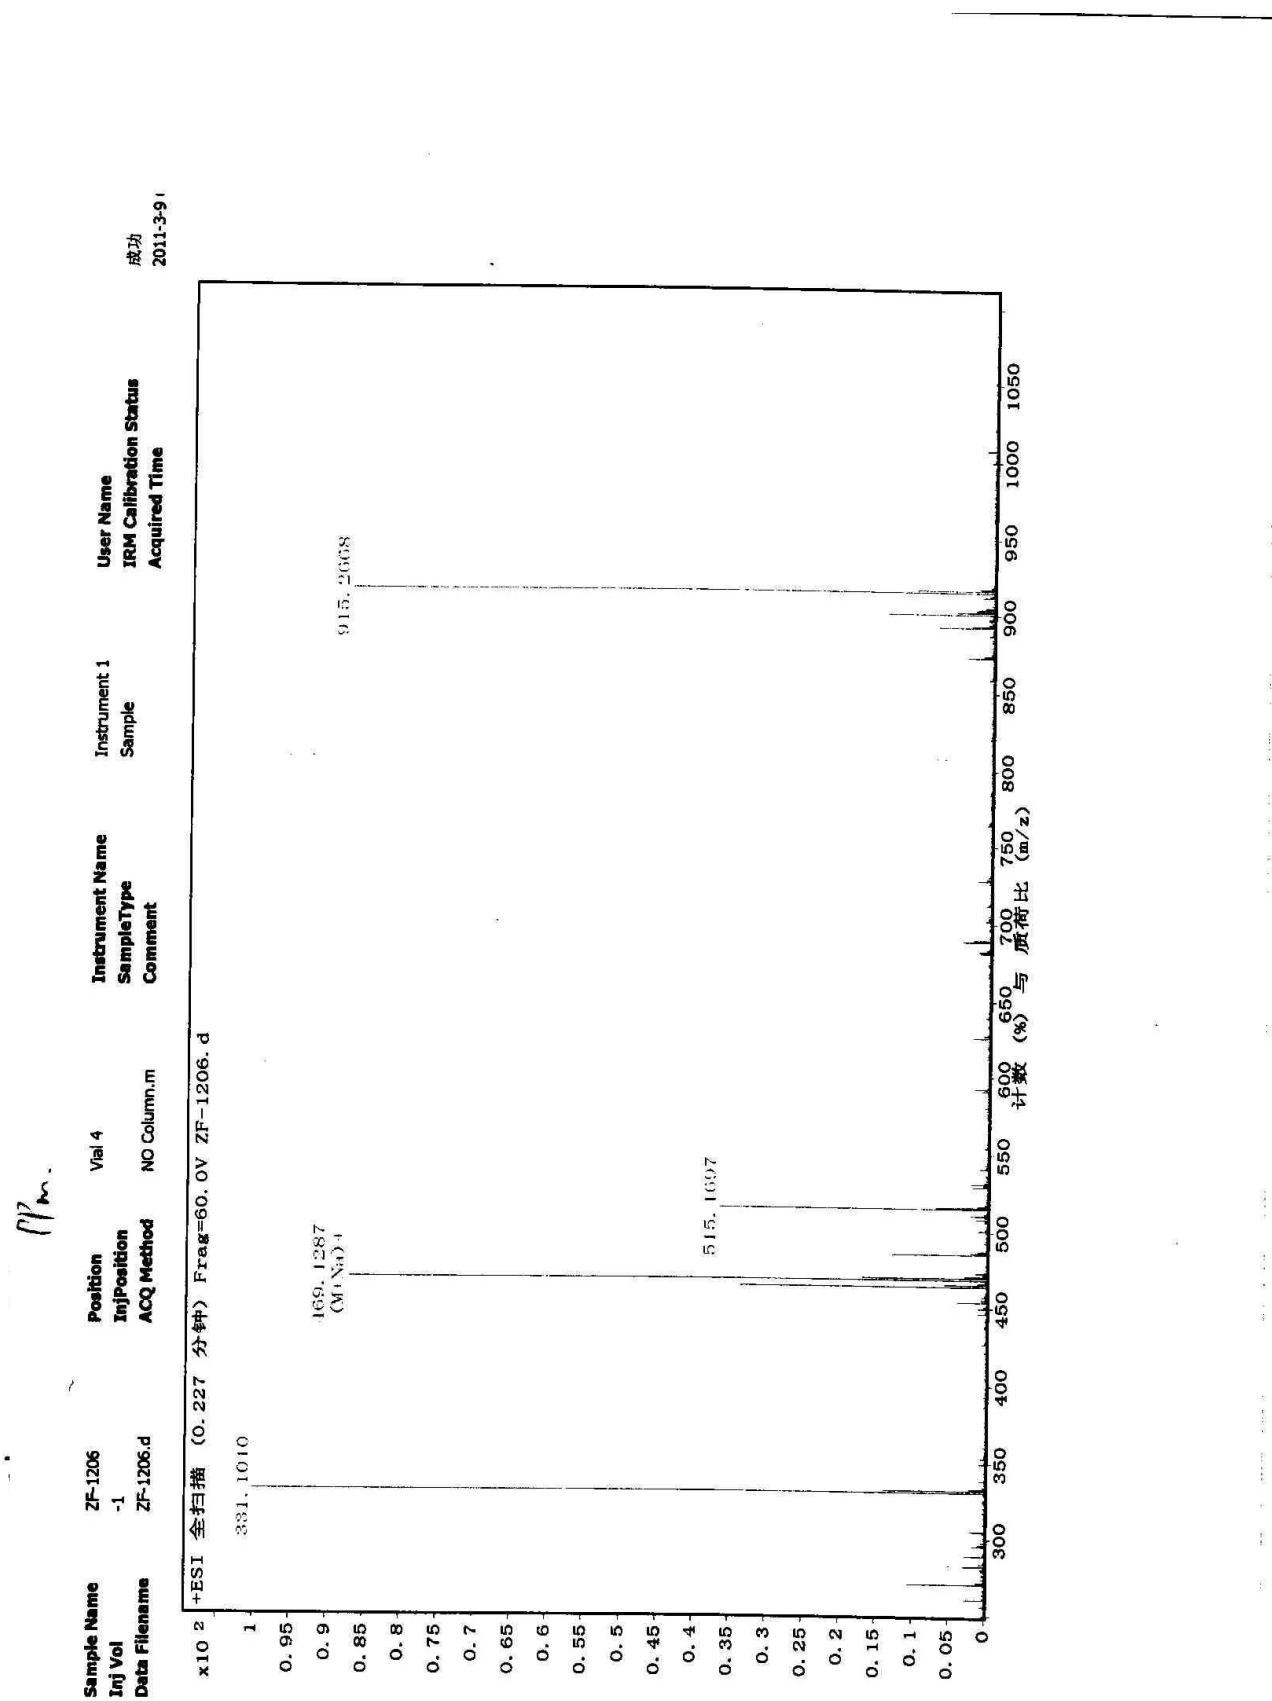

Figure 34.  $^1\text{H}$ -NMR of compound 5c.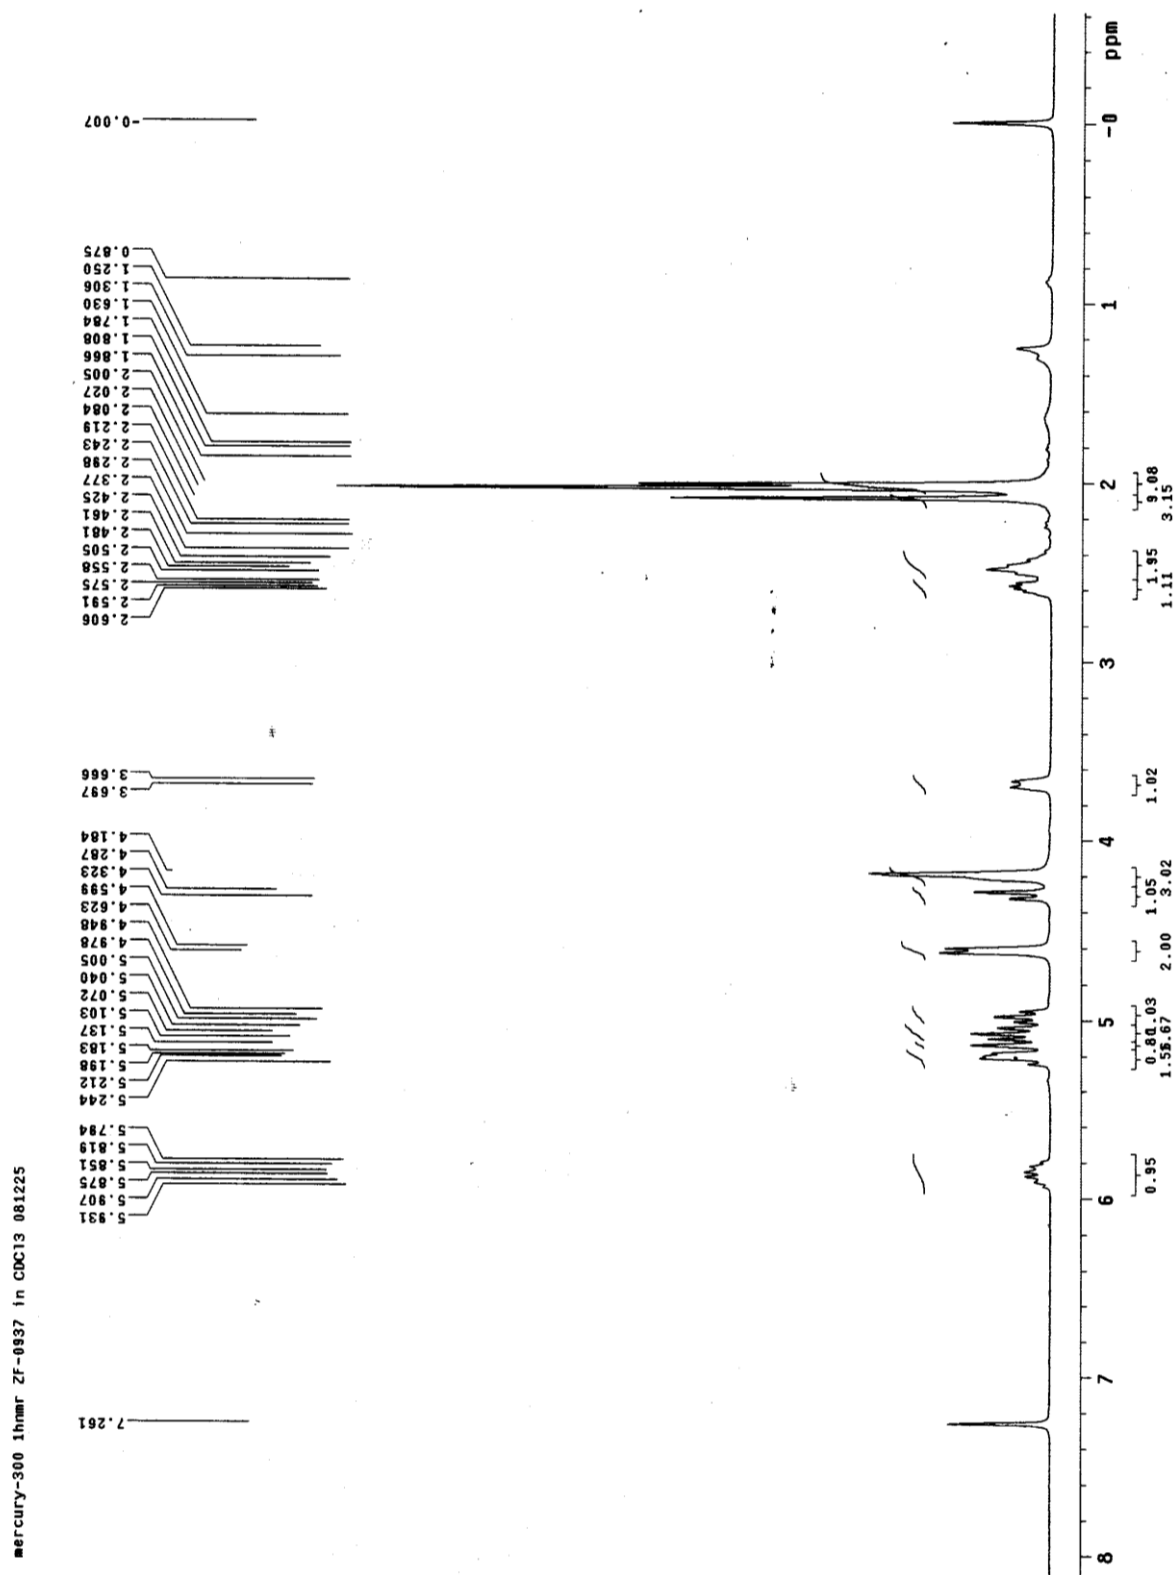

Figure 35.  $^{13}\text{C}$ -NMR of compound 5c.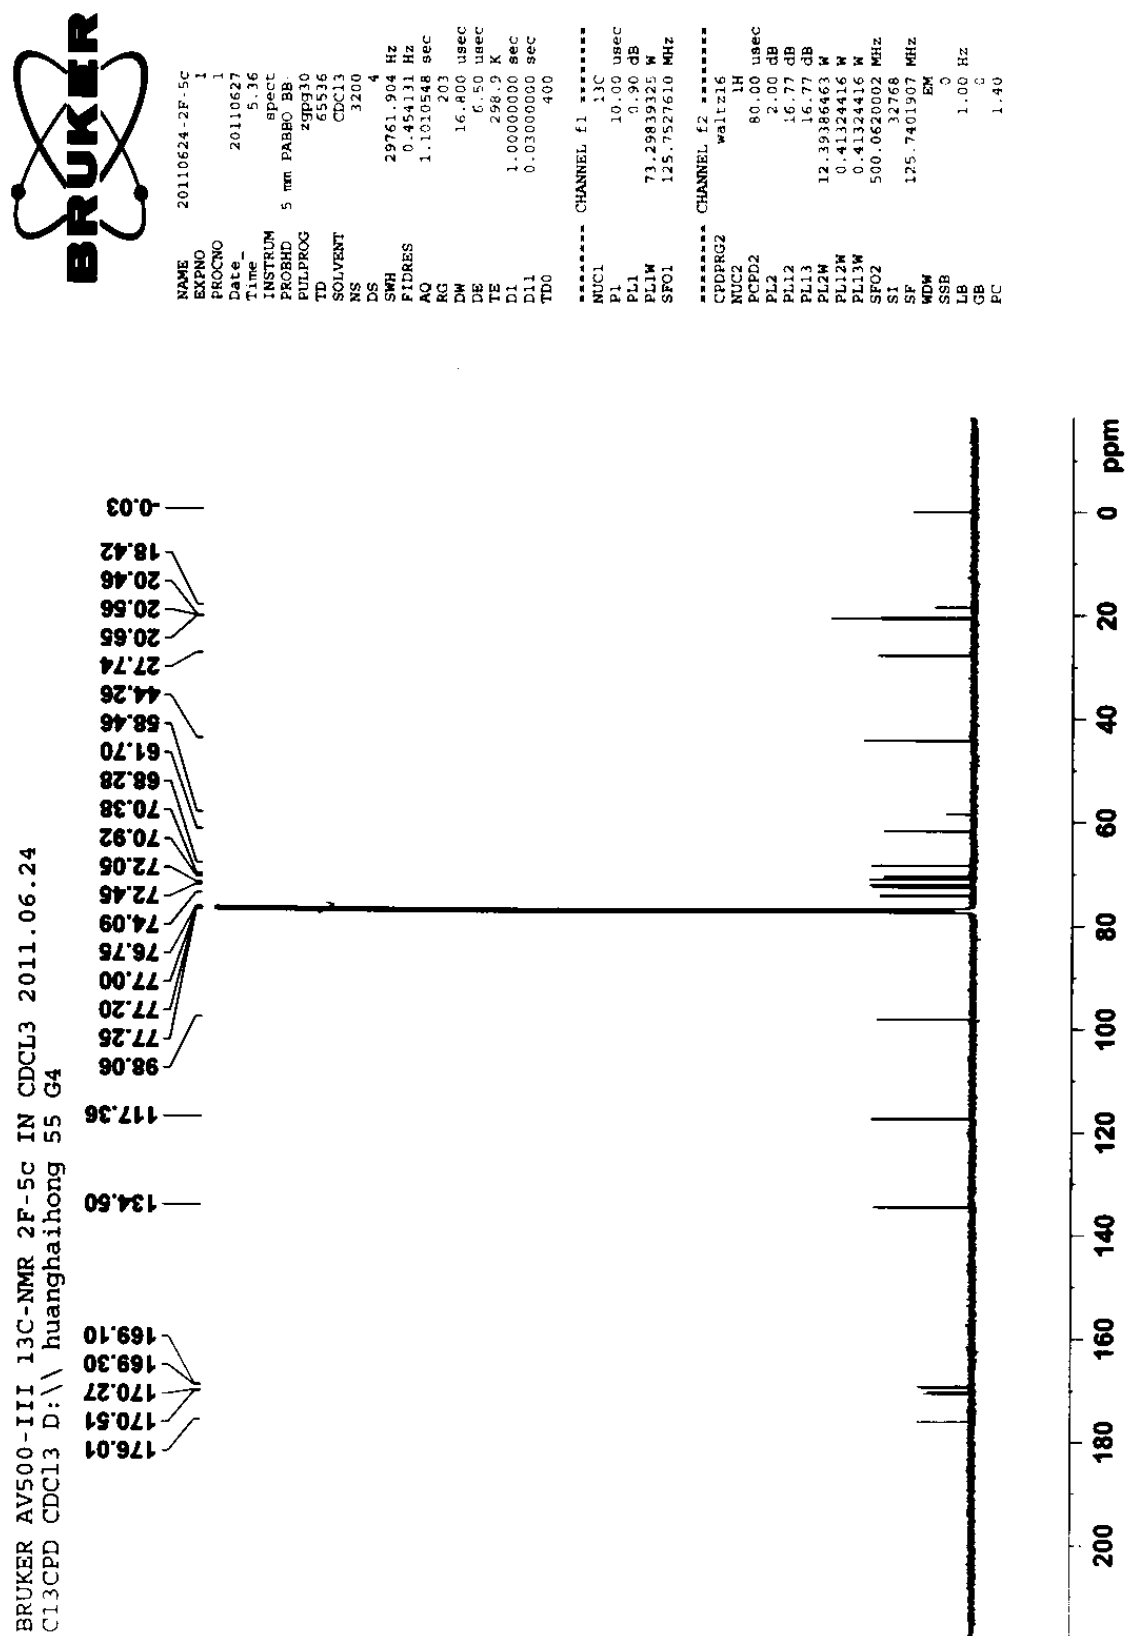

Figure 36. HRMS of compound 5c.

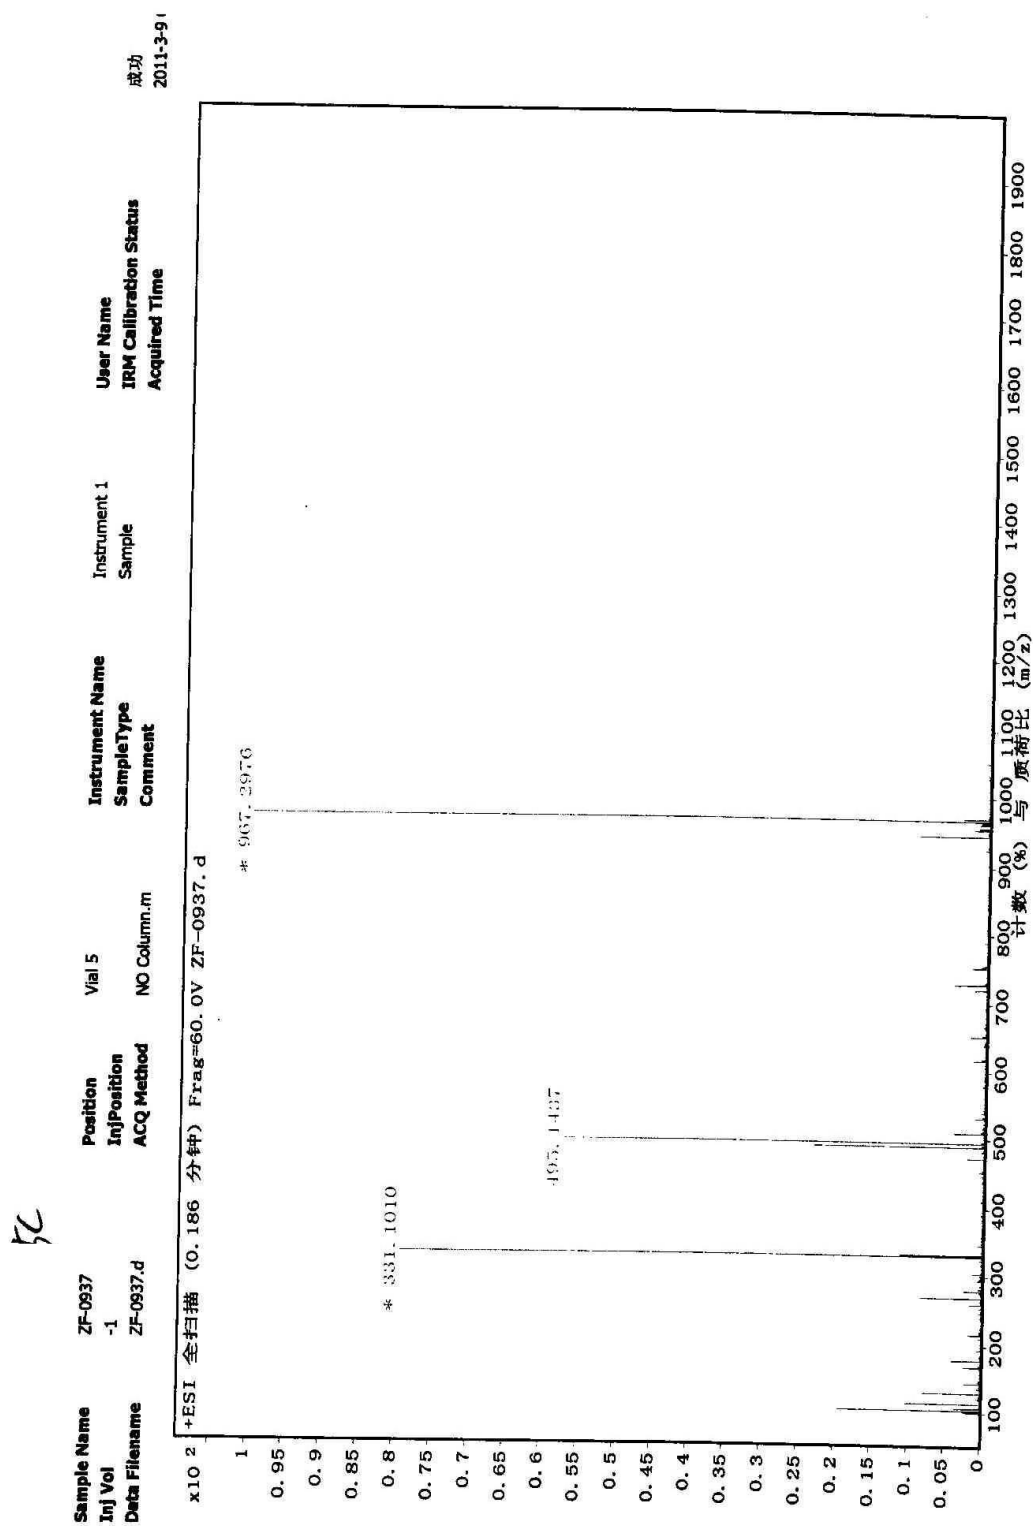



Figure 37.  $^1\text{H}$ -NMR of compound 5d.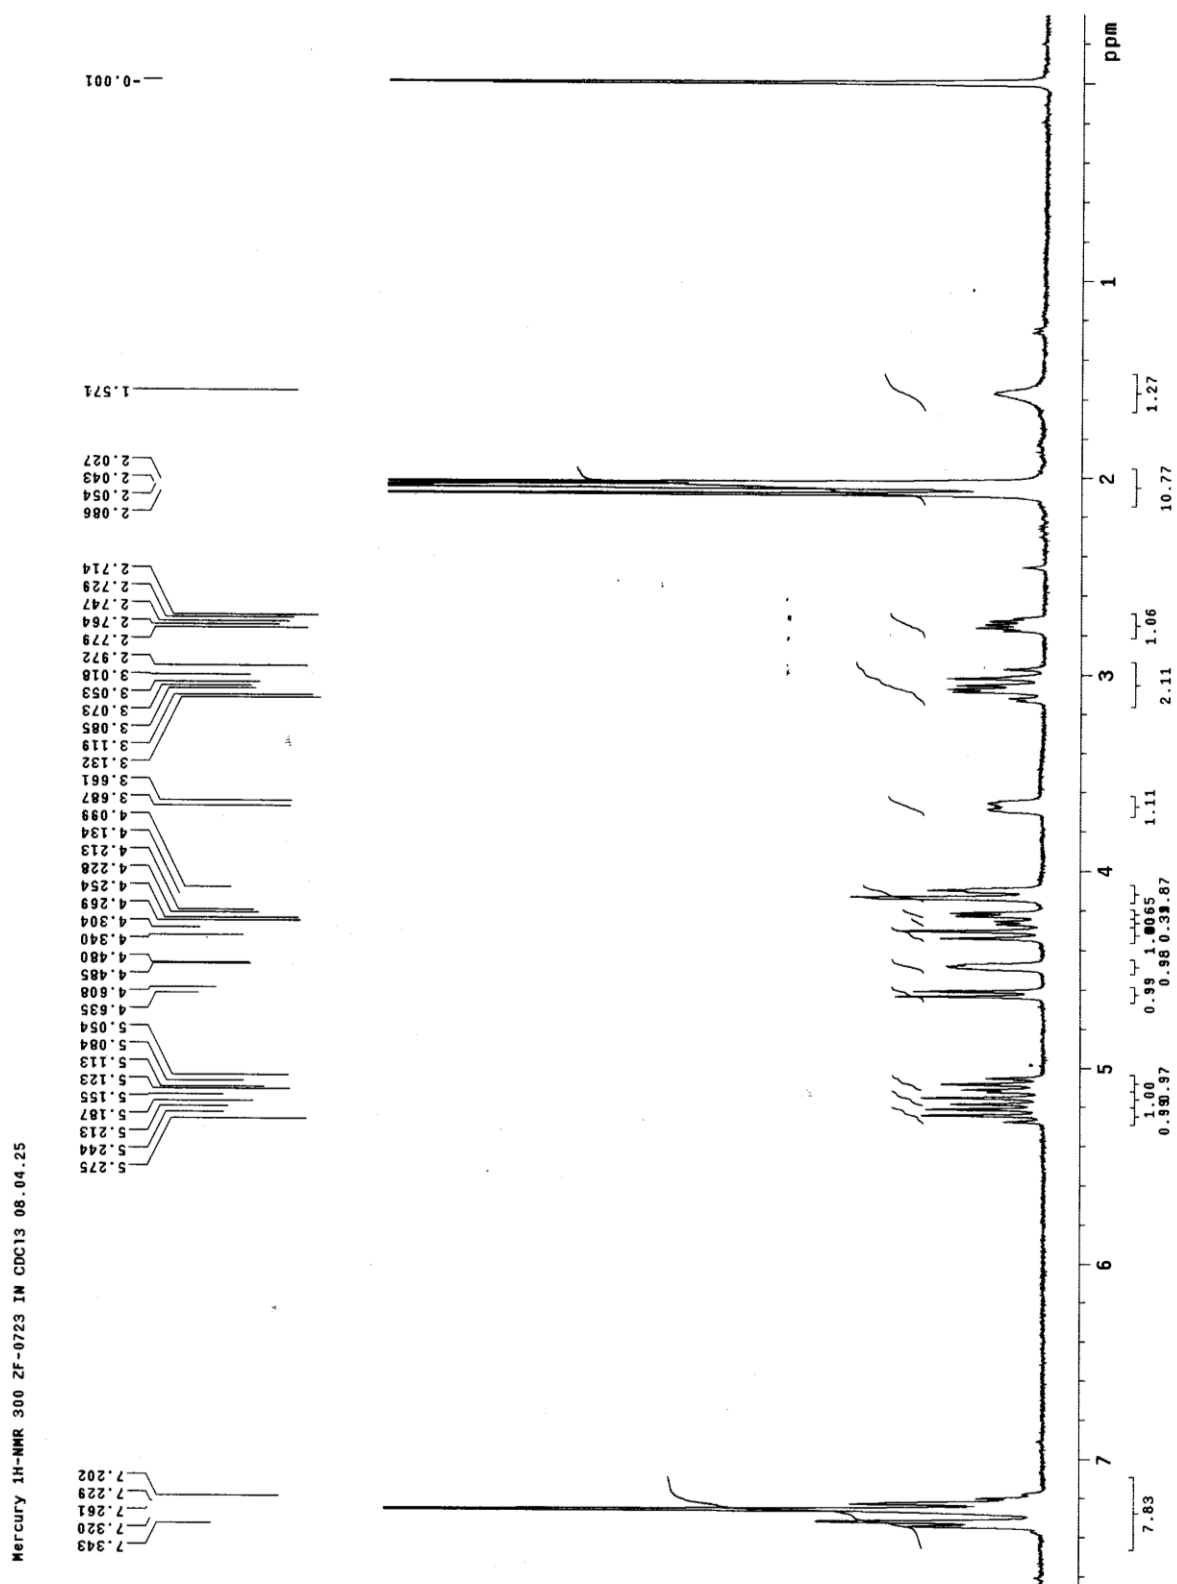

Figure 38. NOE of compound 5d.

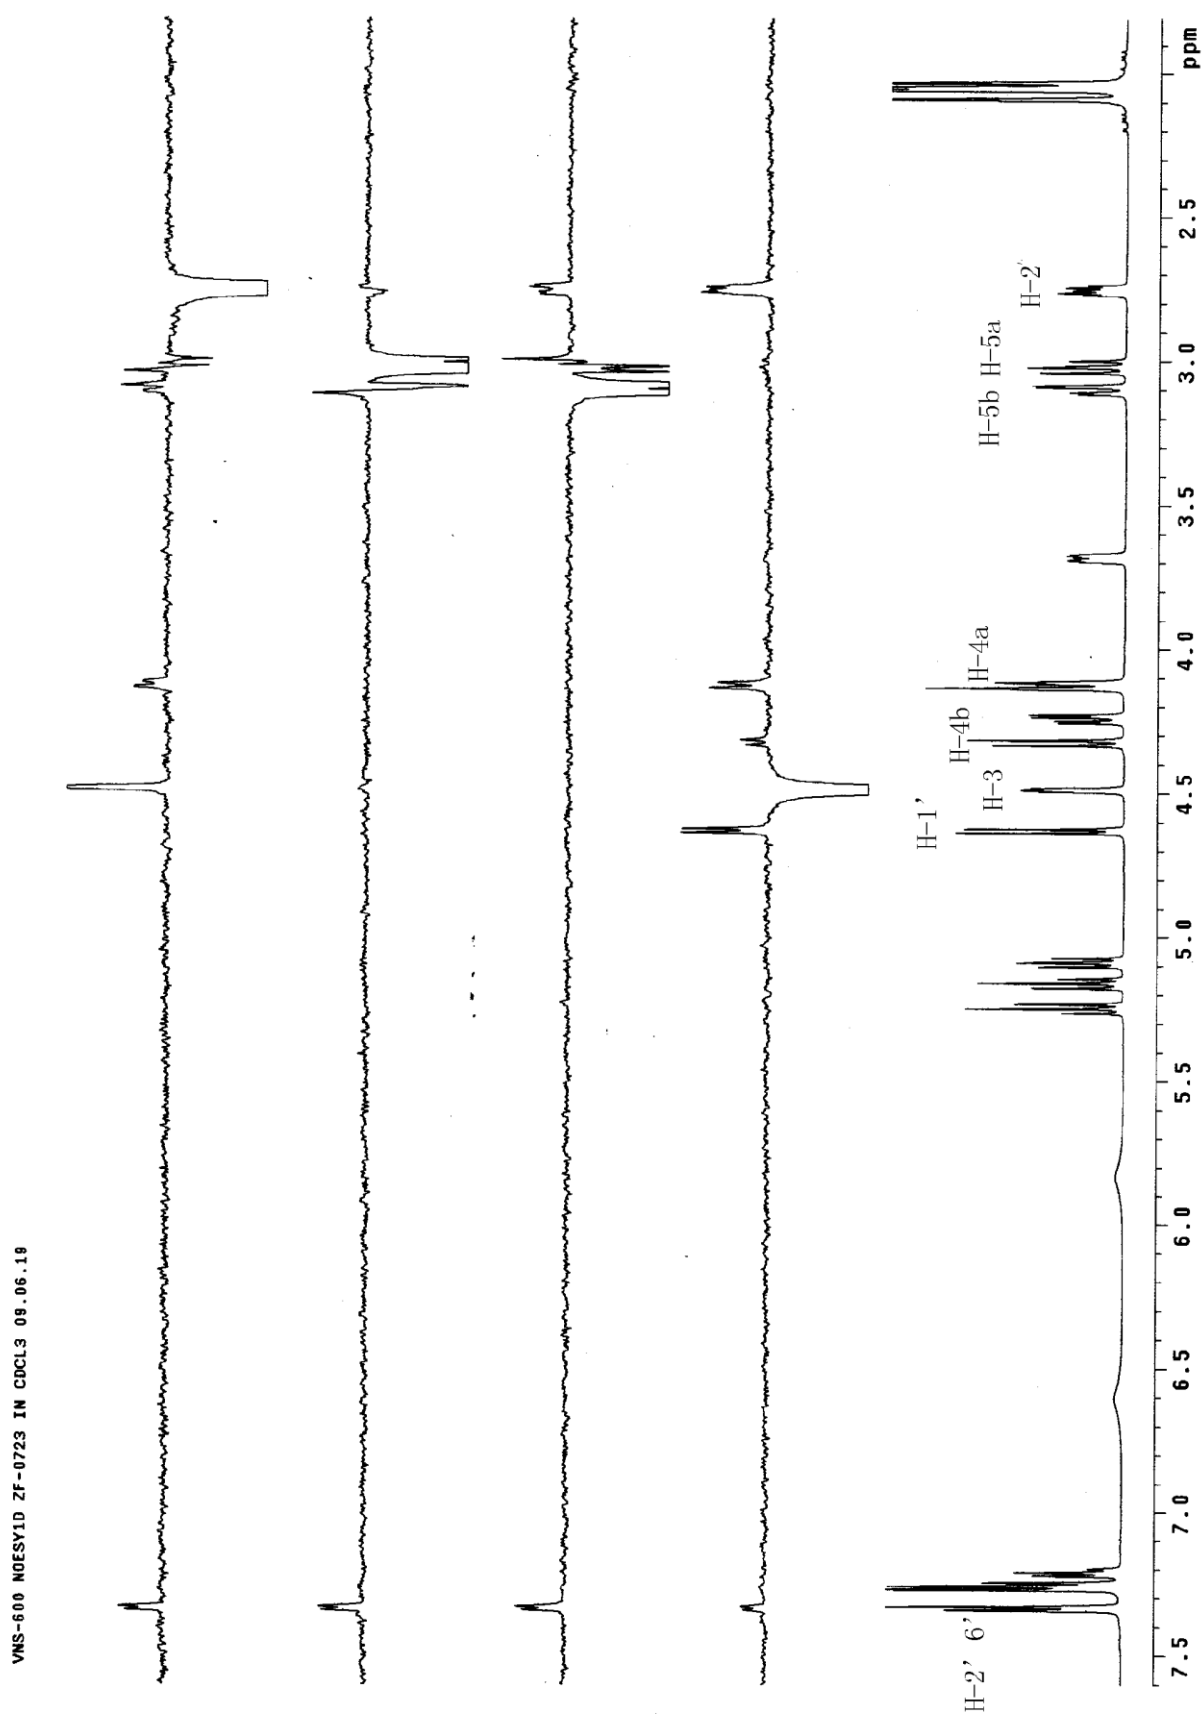

**Figure 39.**  $^{13}\text{C}$ -NMR of compound 5d.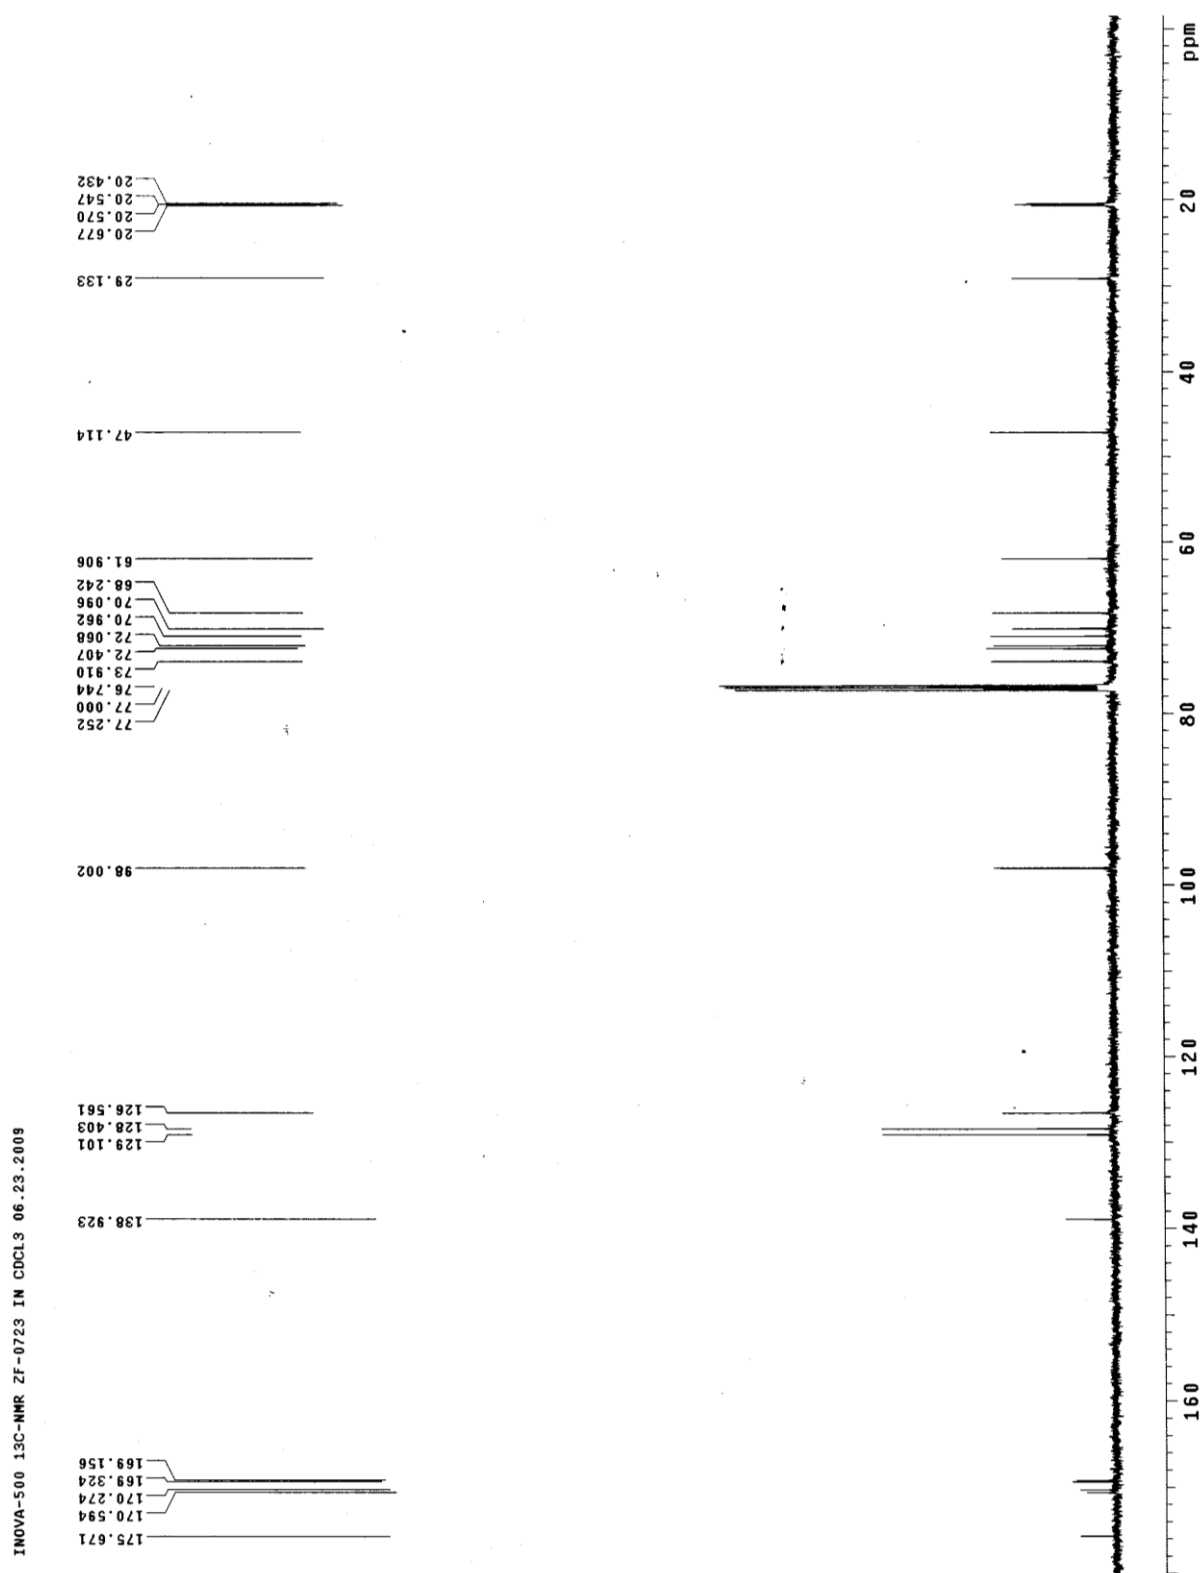

Figure 40. HRMS of compound 5d.

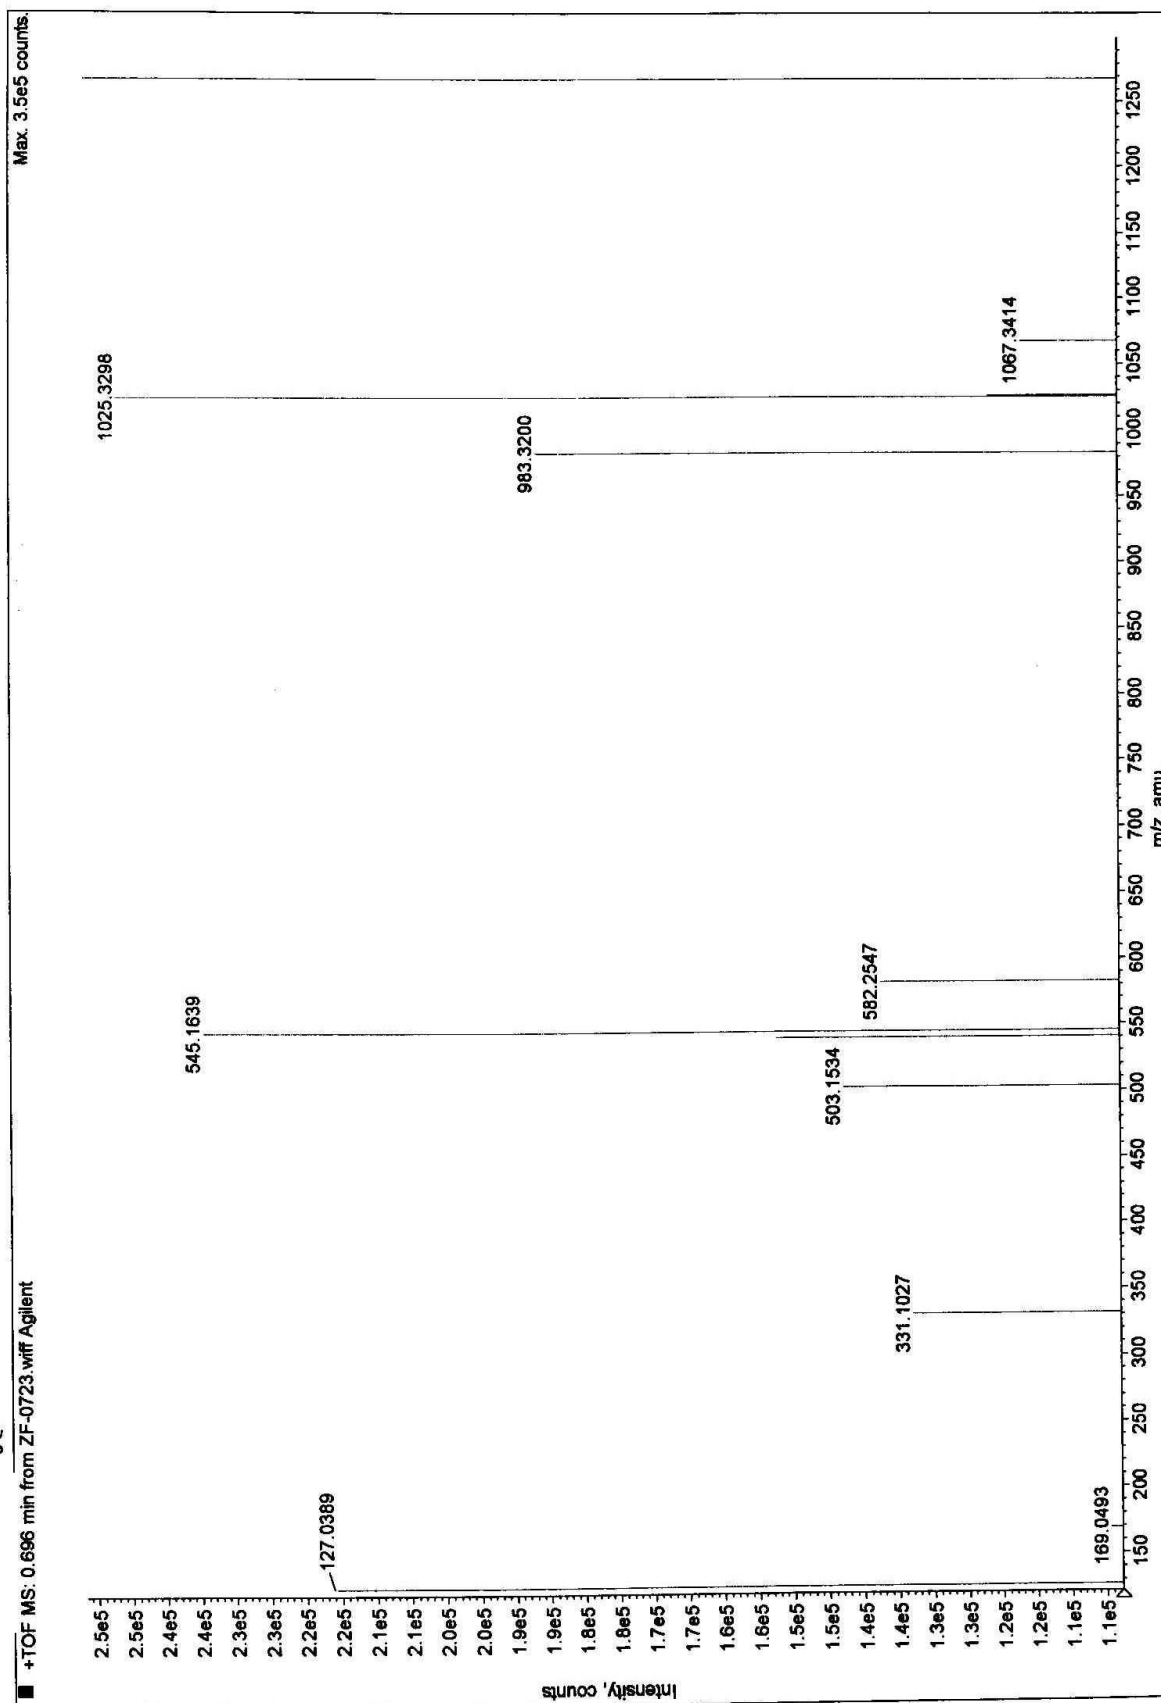

Figure 41.  $^1\text{H}$ -NMR of compound 5e.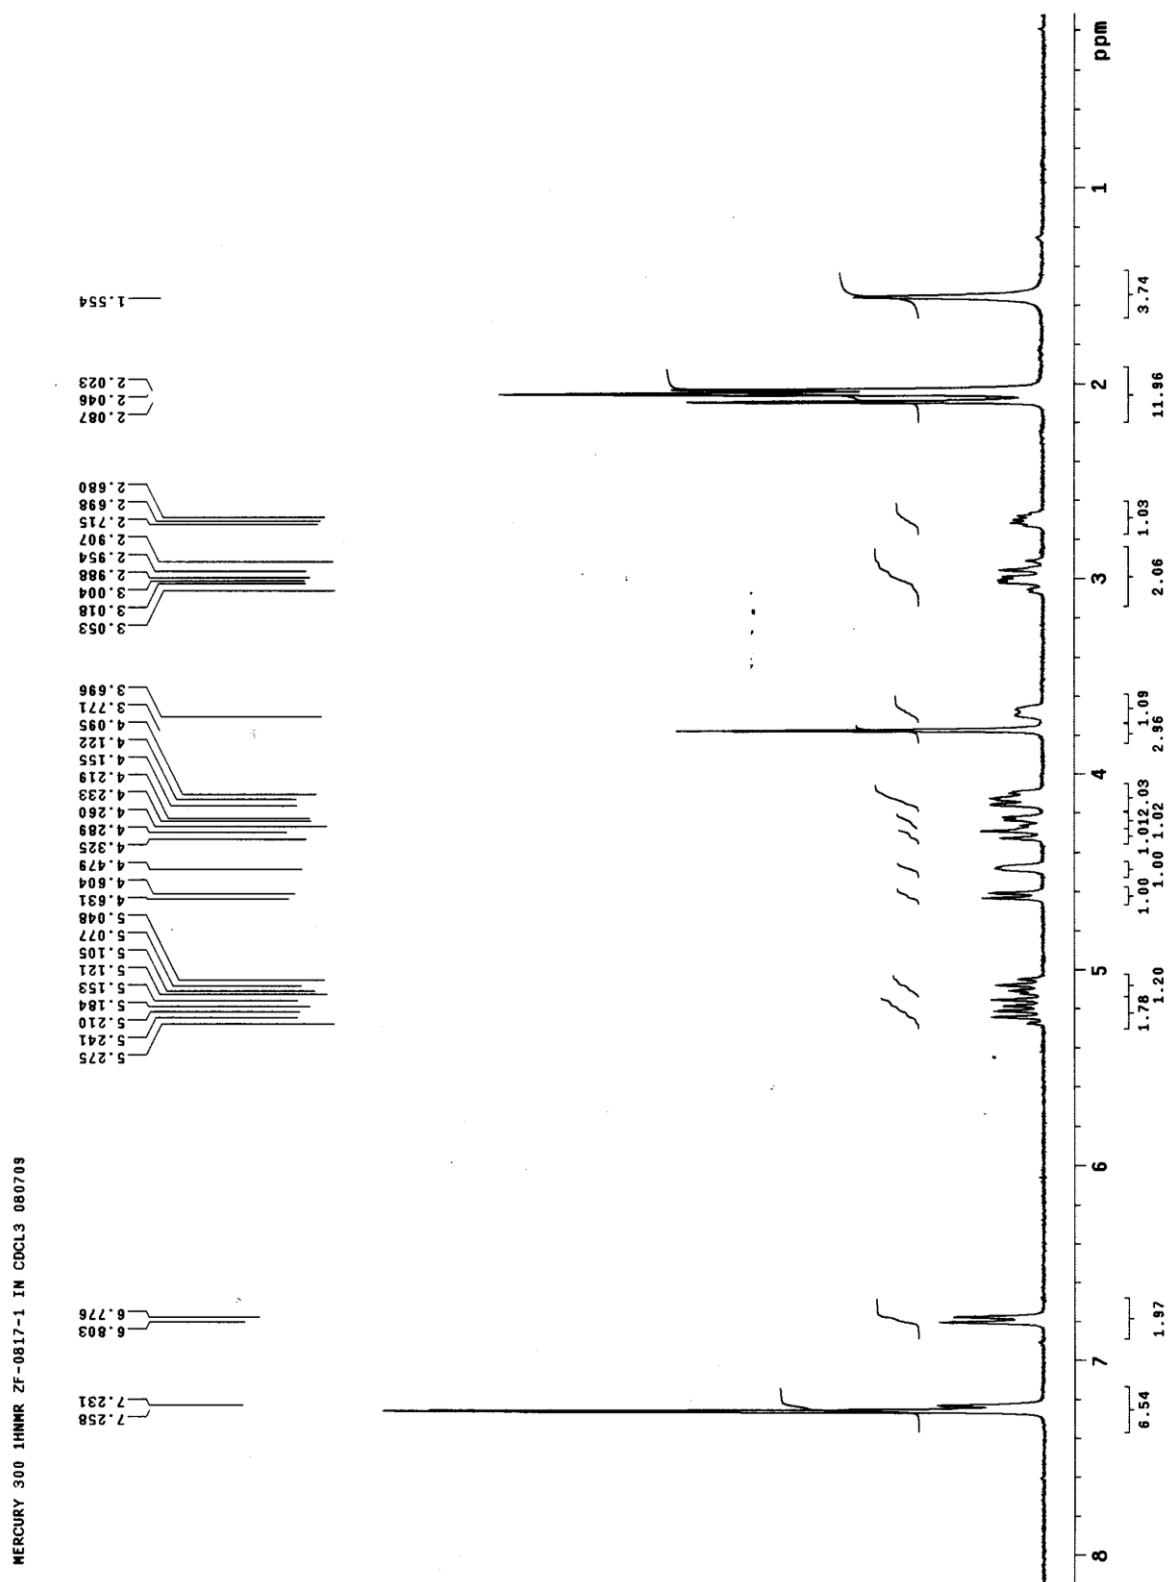

Figure 42.  $^{13}\text{C}$ -NMR of compound 5e.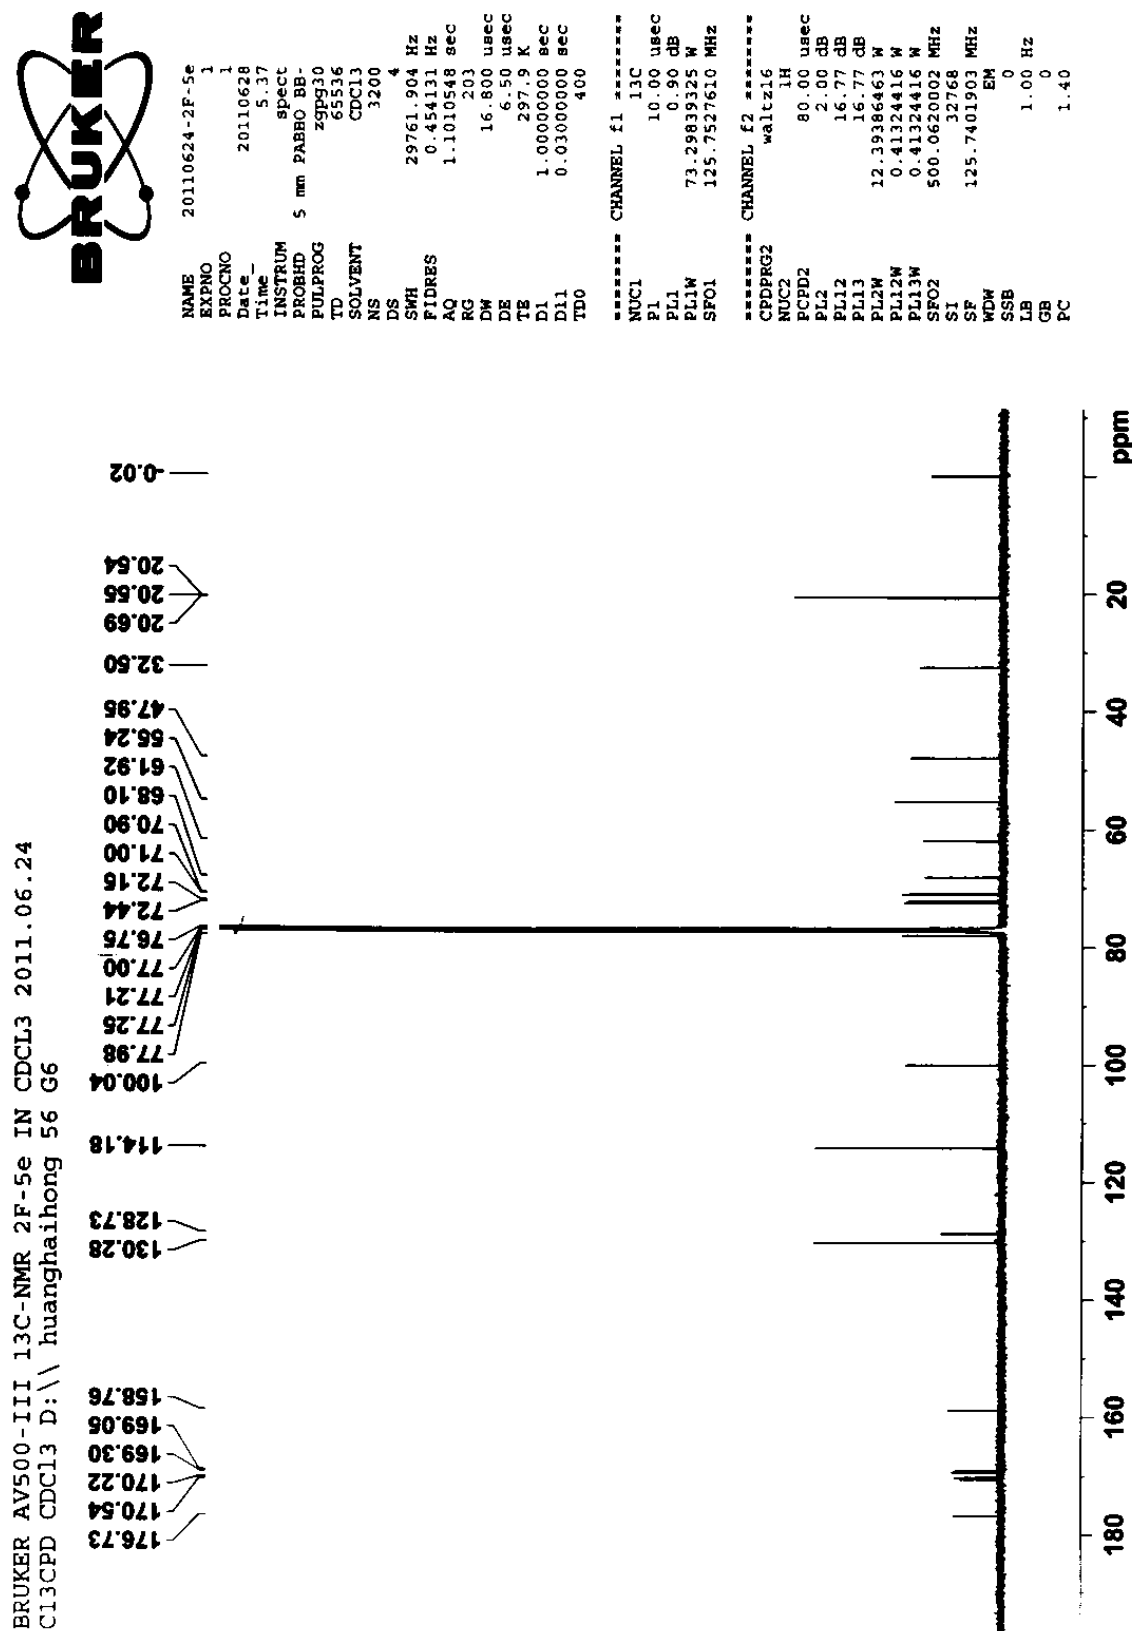

Figure 43. HRMS of compound 5e.

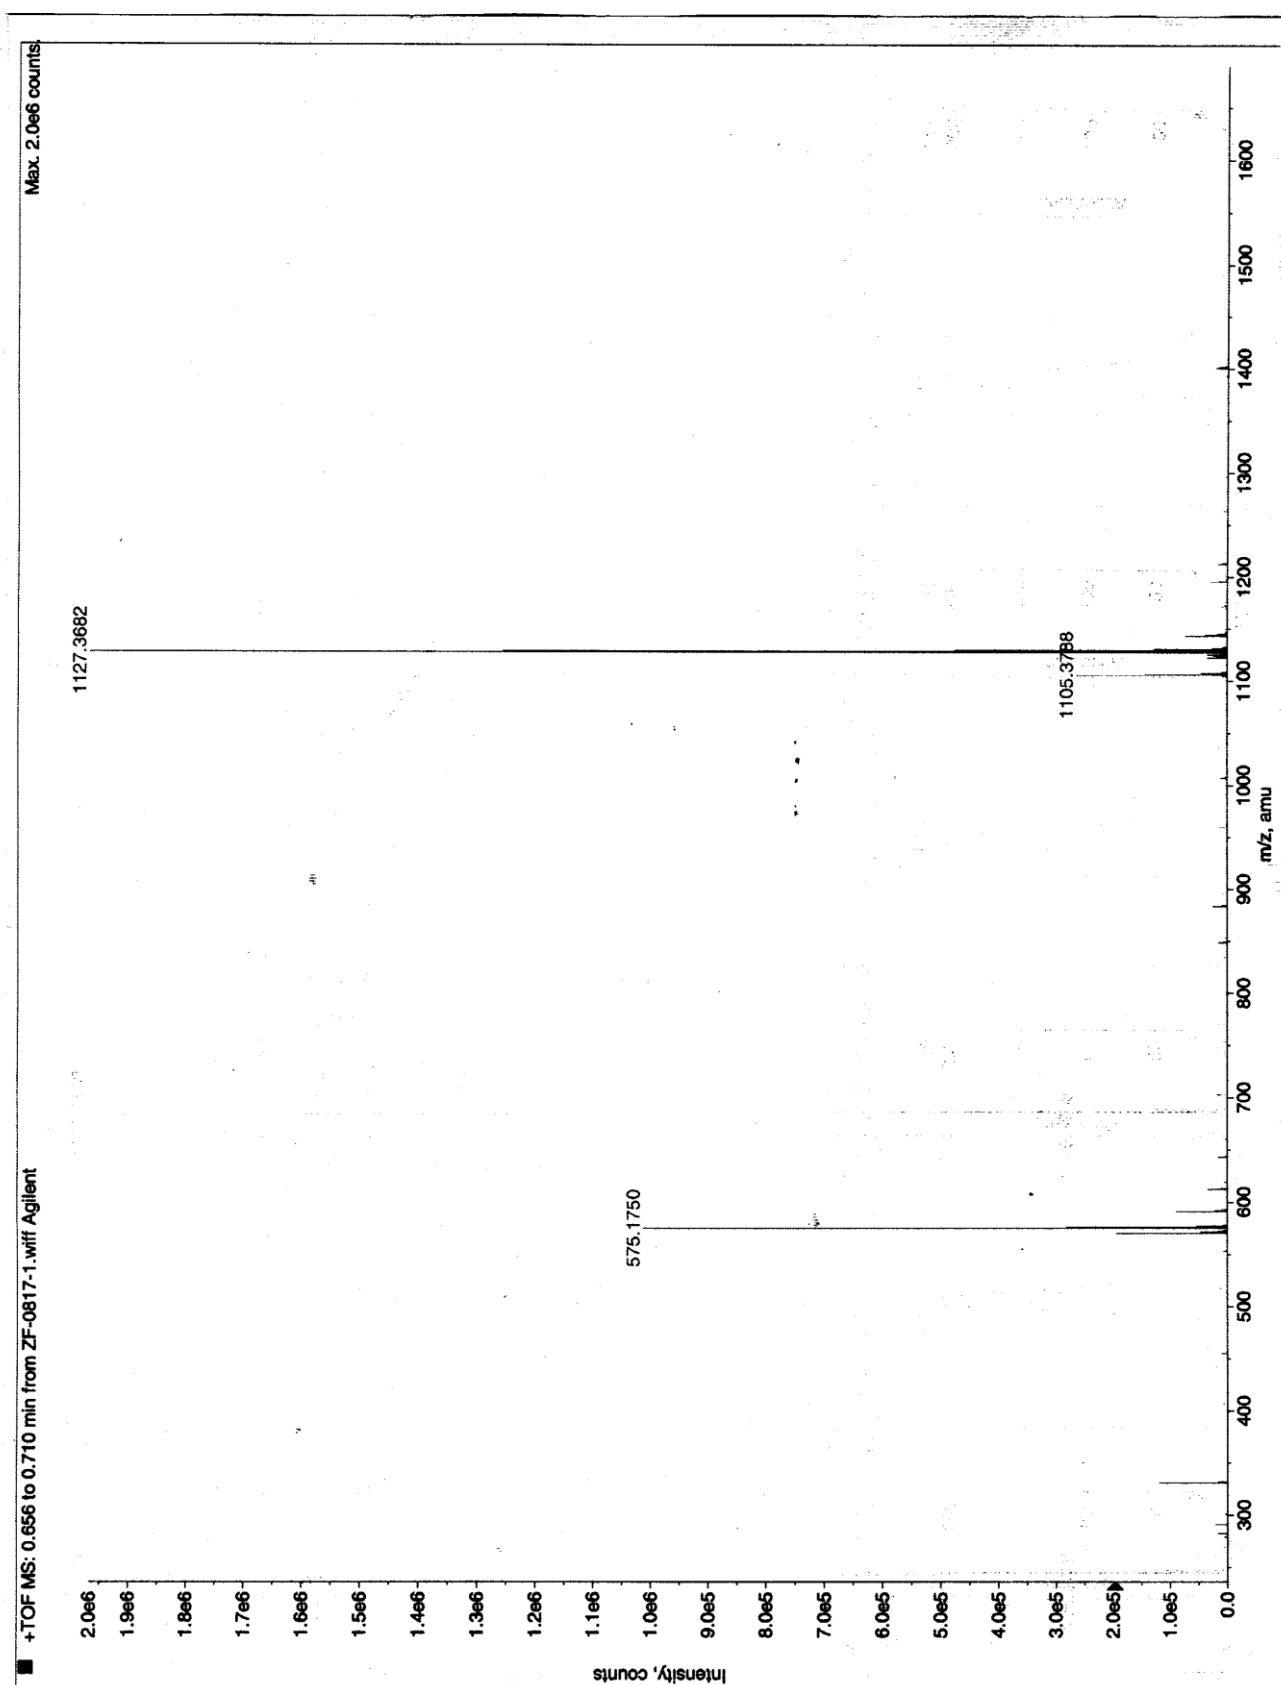

Figure 44.  $^1\text{H}$ -NMR of compound 6a.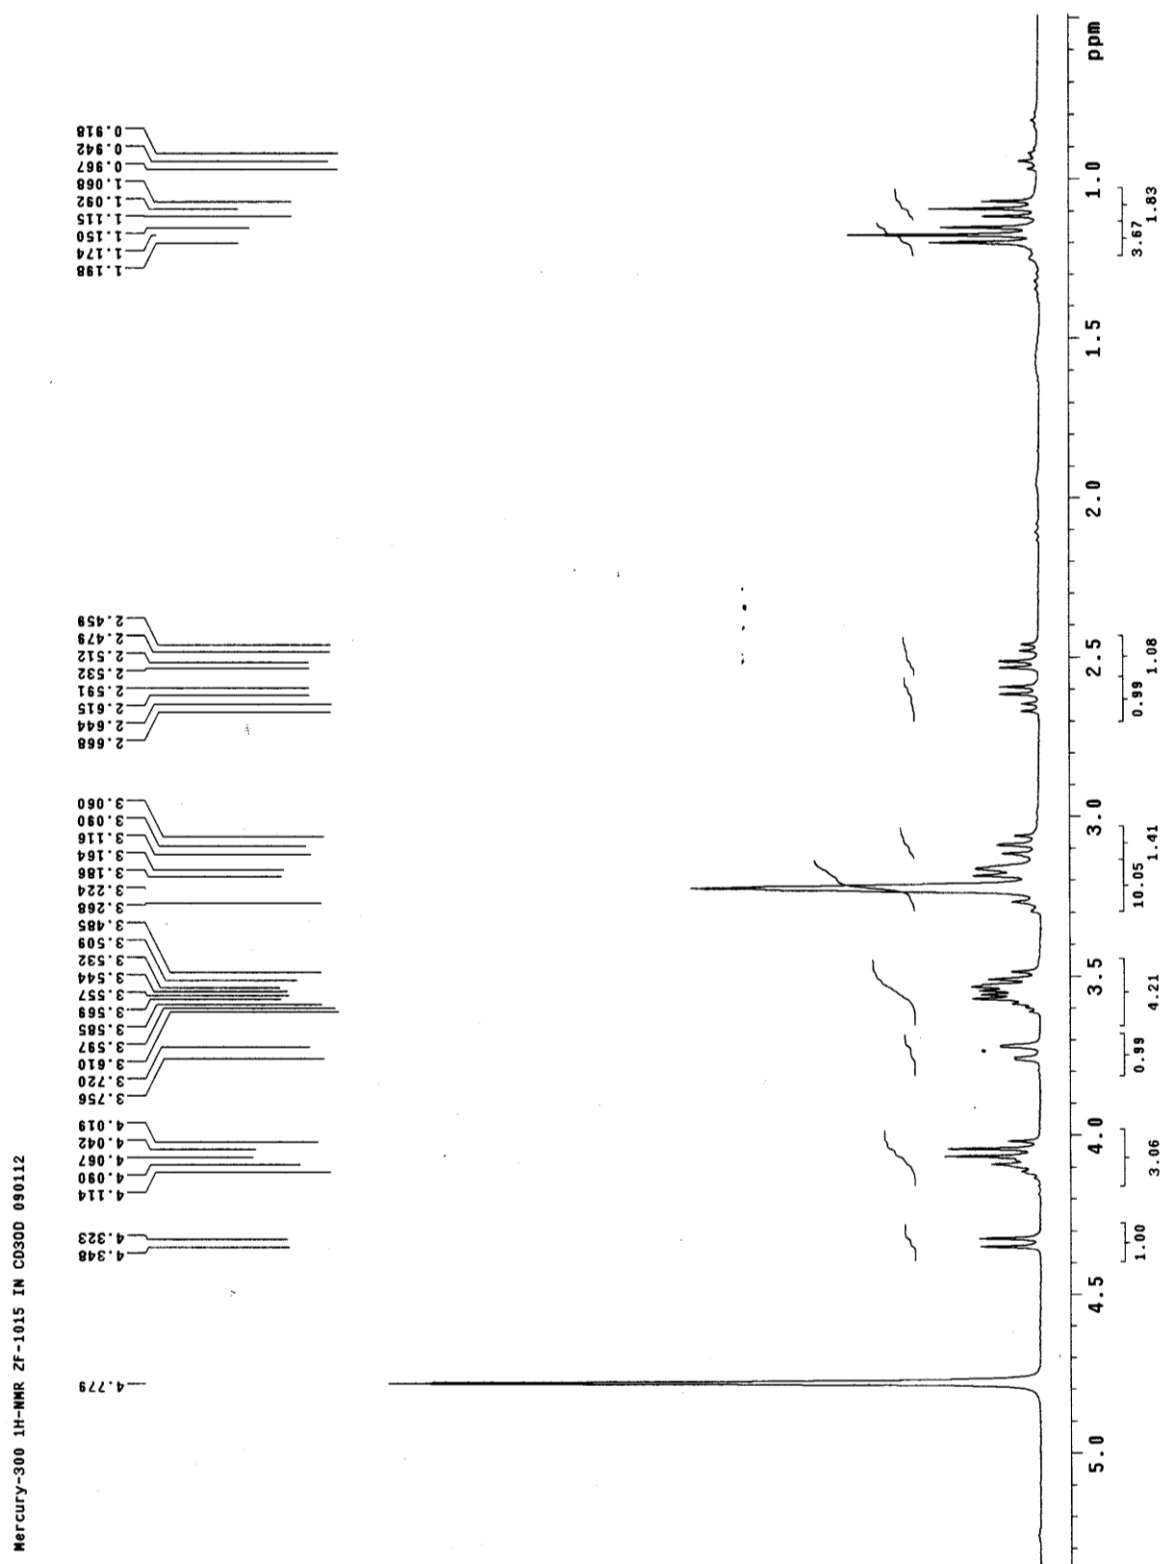



Figure 45. HRMS of compound 6a.

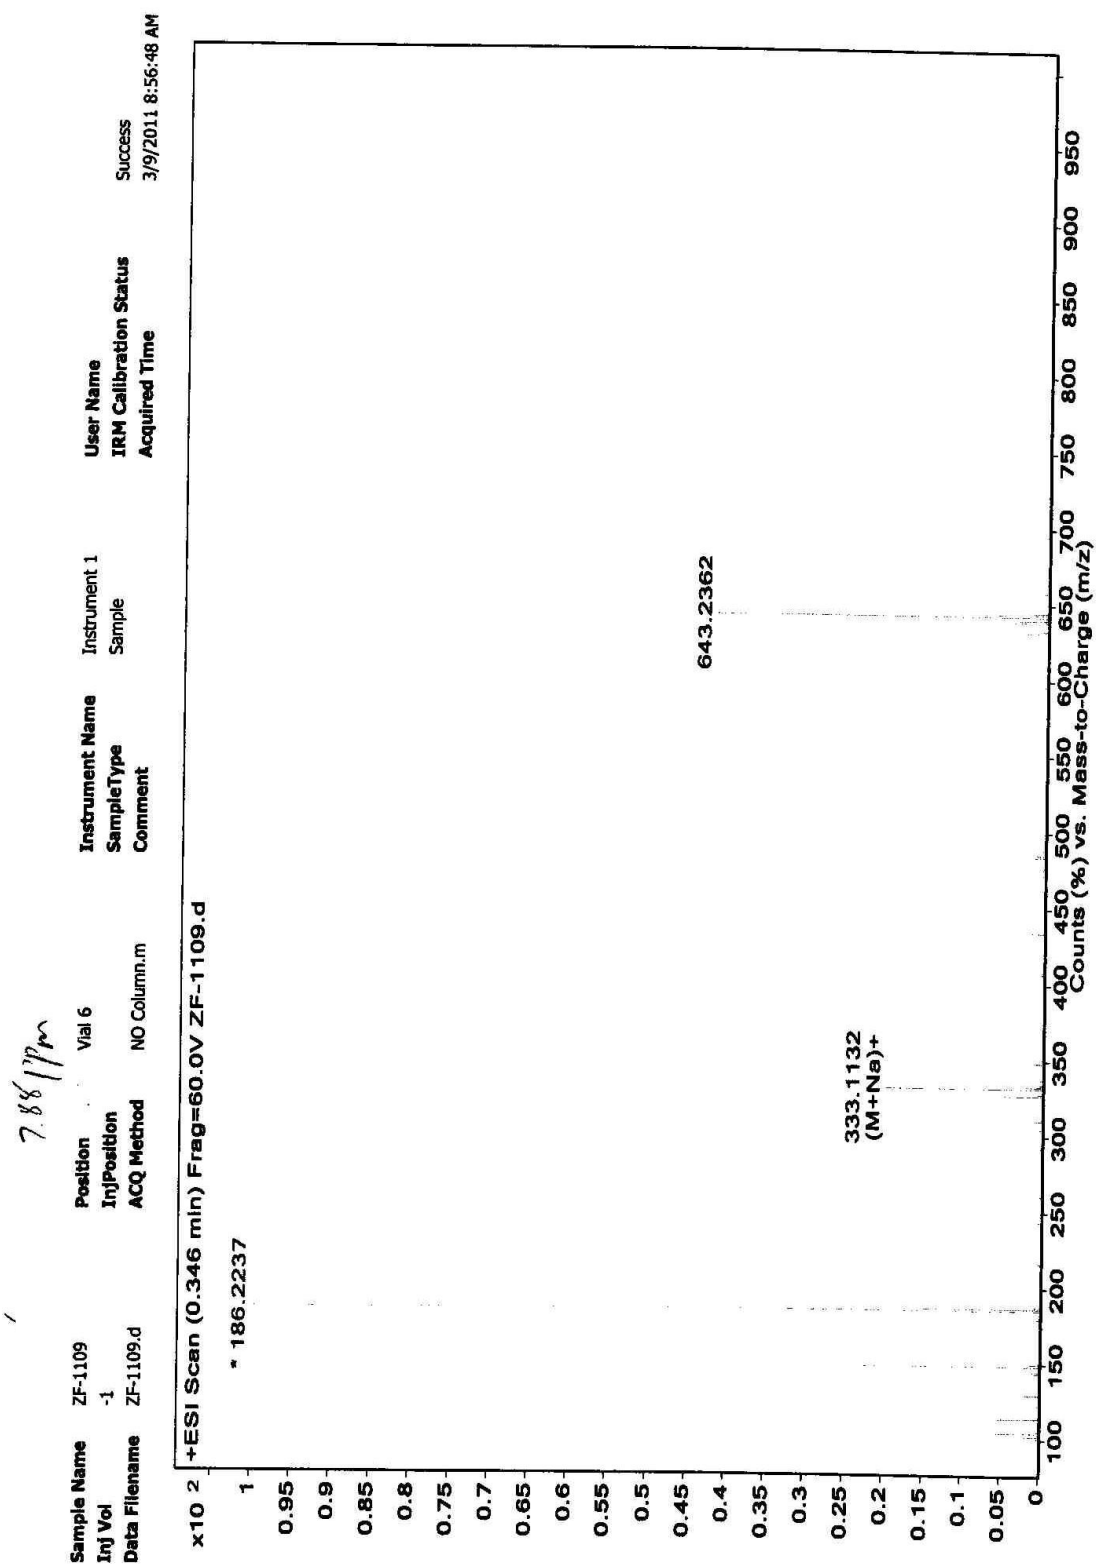

Figure 46.  $^1\text{H}$ -NMR of compound 6b.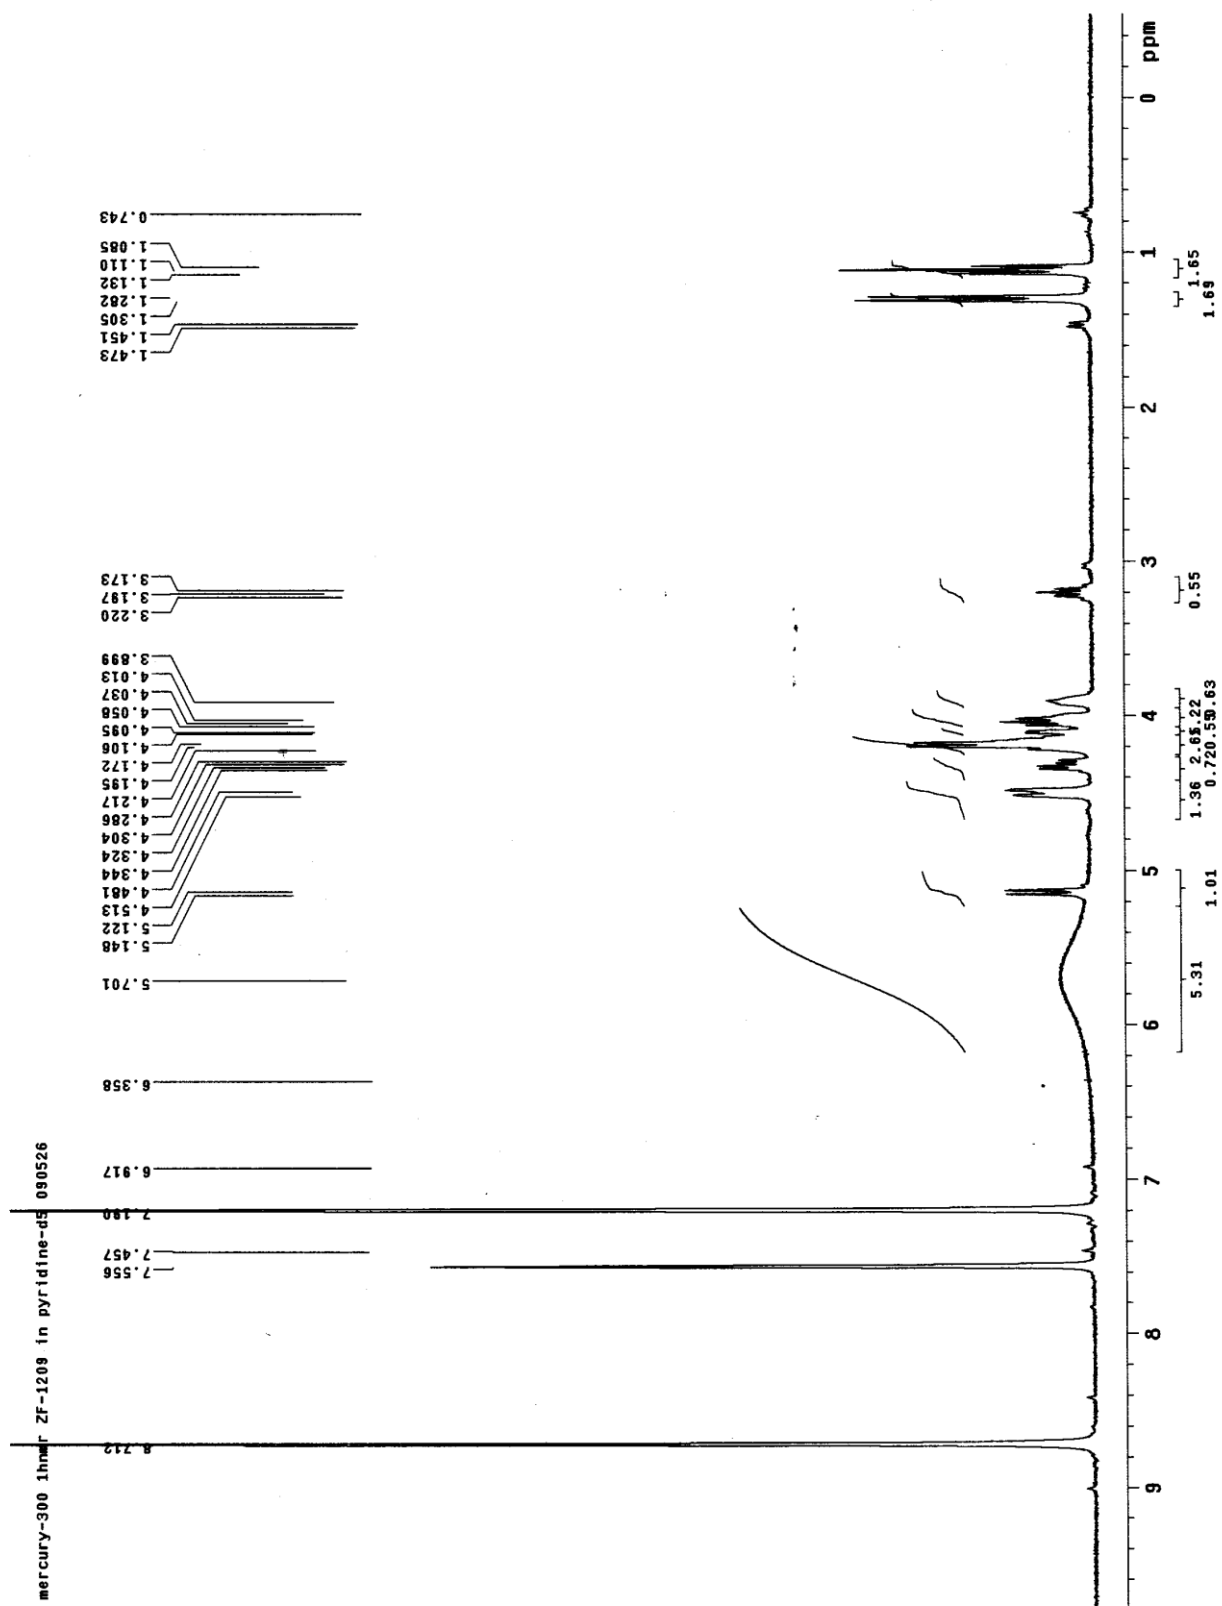

Figure 47. HRMS of compound 6b.

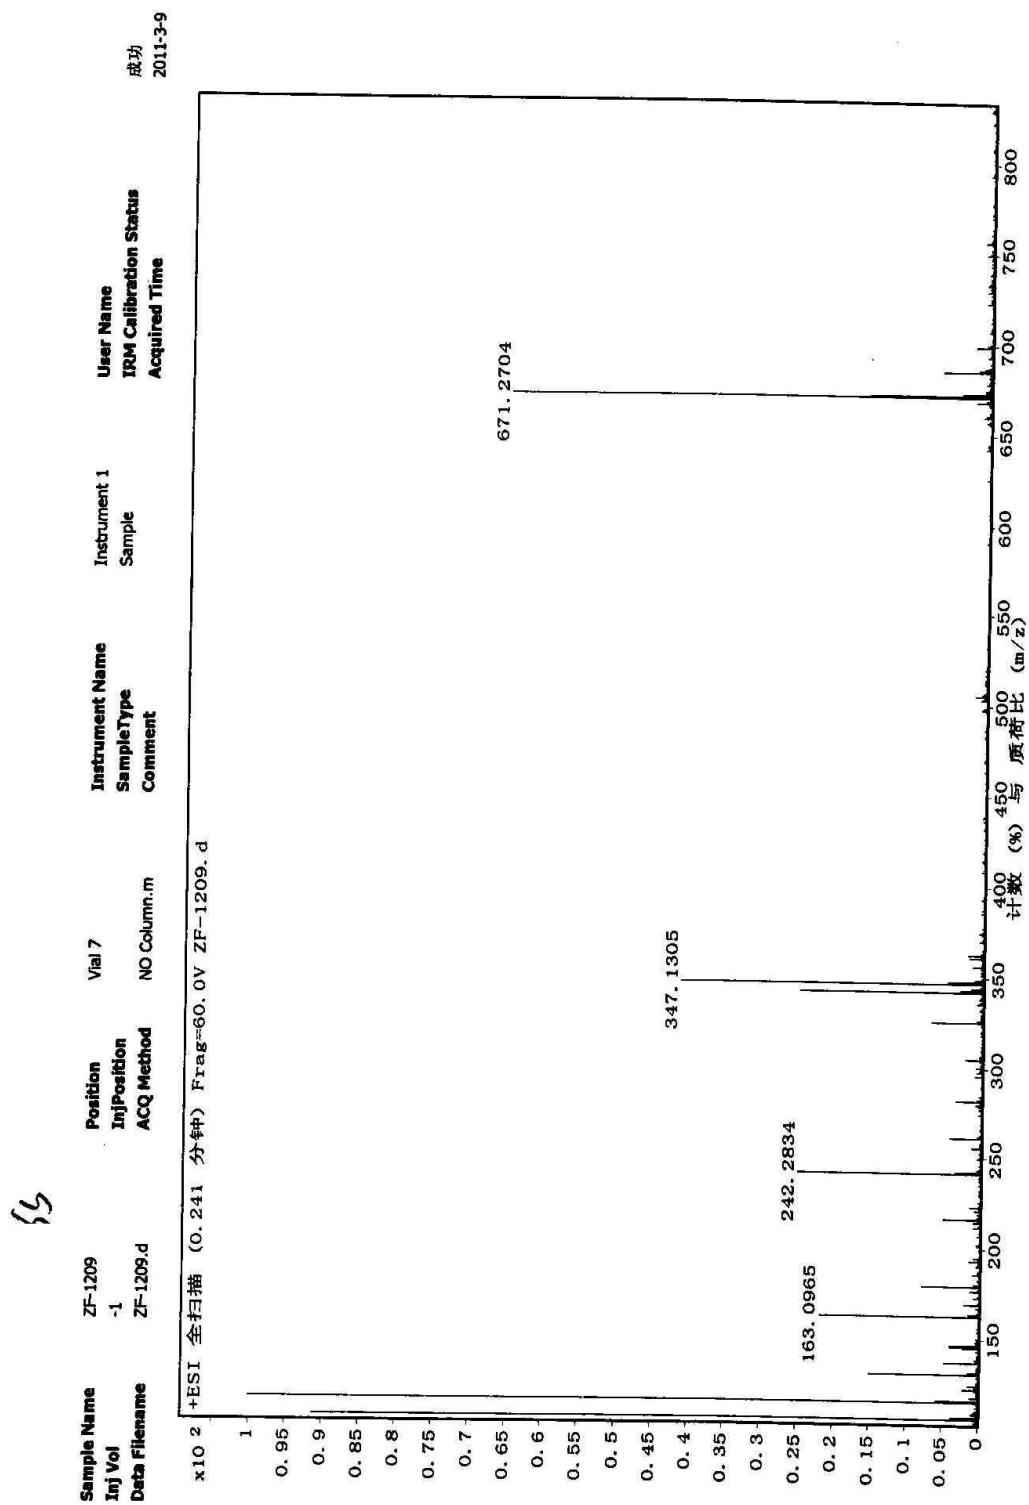

Figure 48.  $^1\text{H}$ -NMR of compound 6c.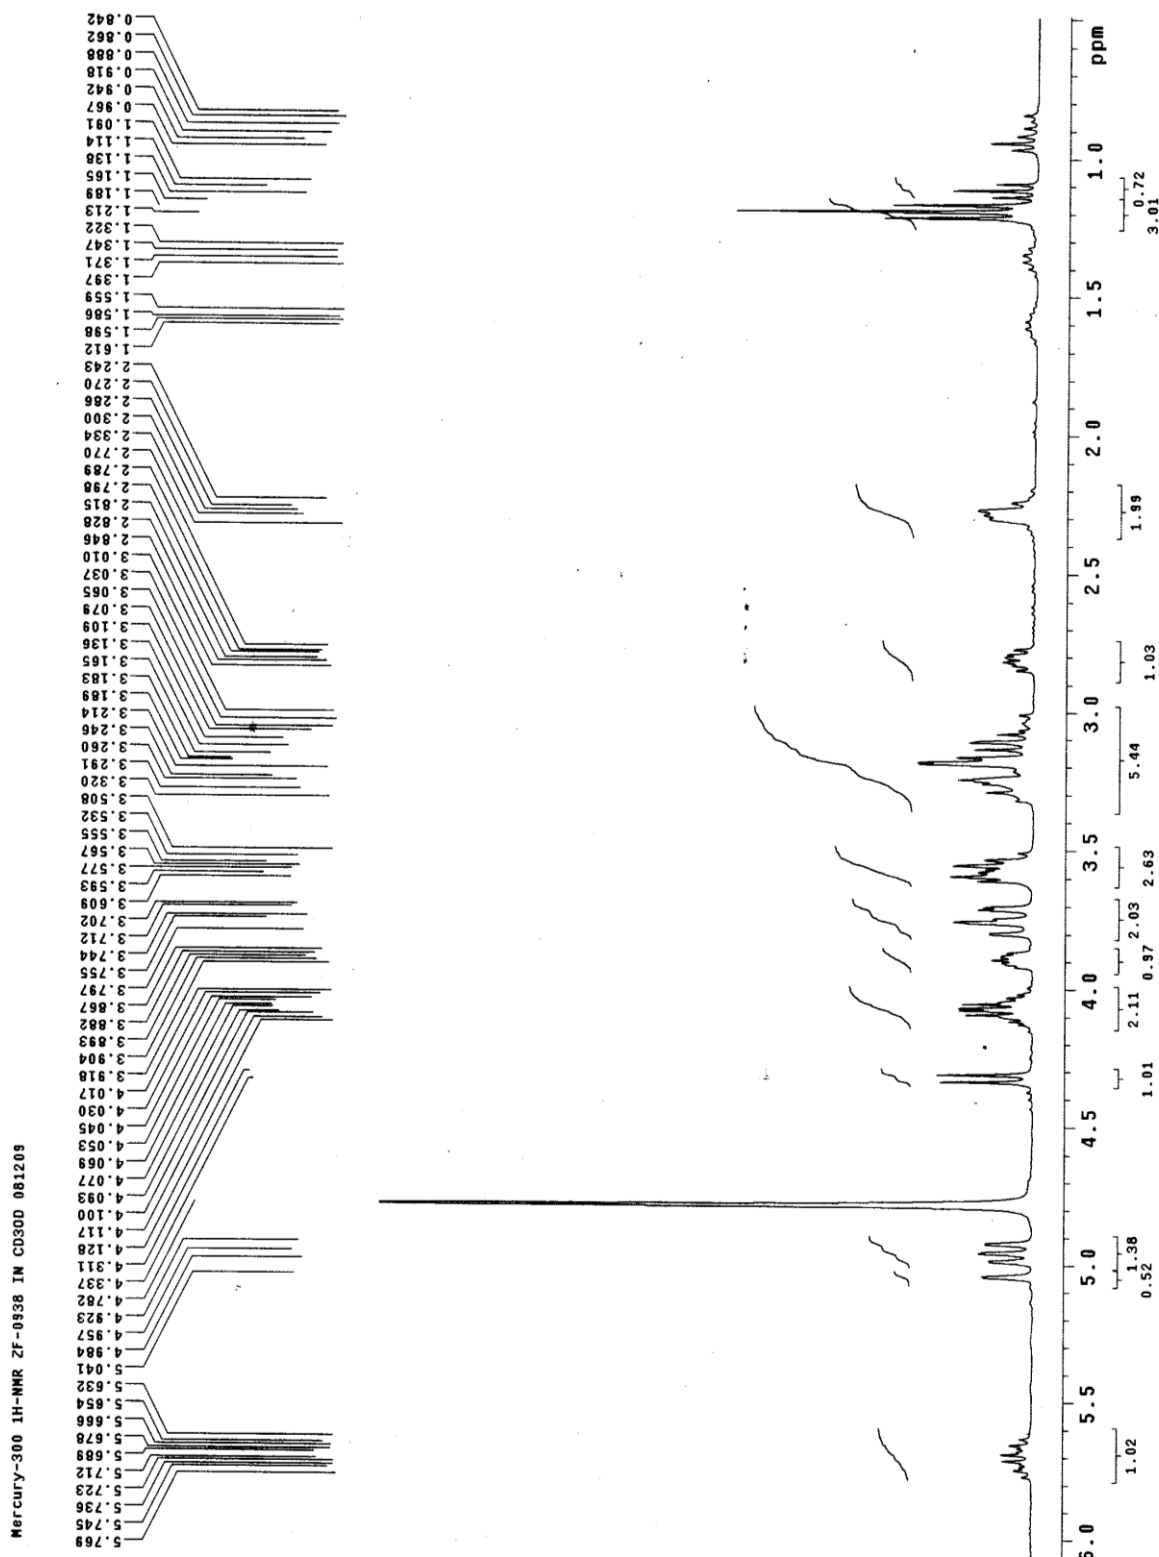

Figure 49. HRMS of compound 6c.

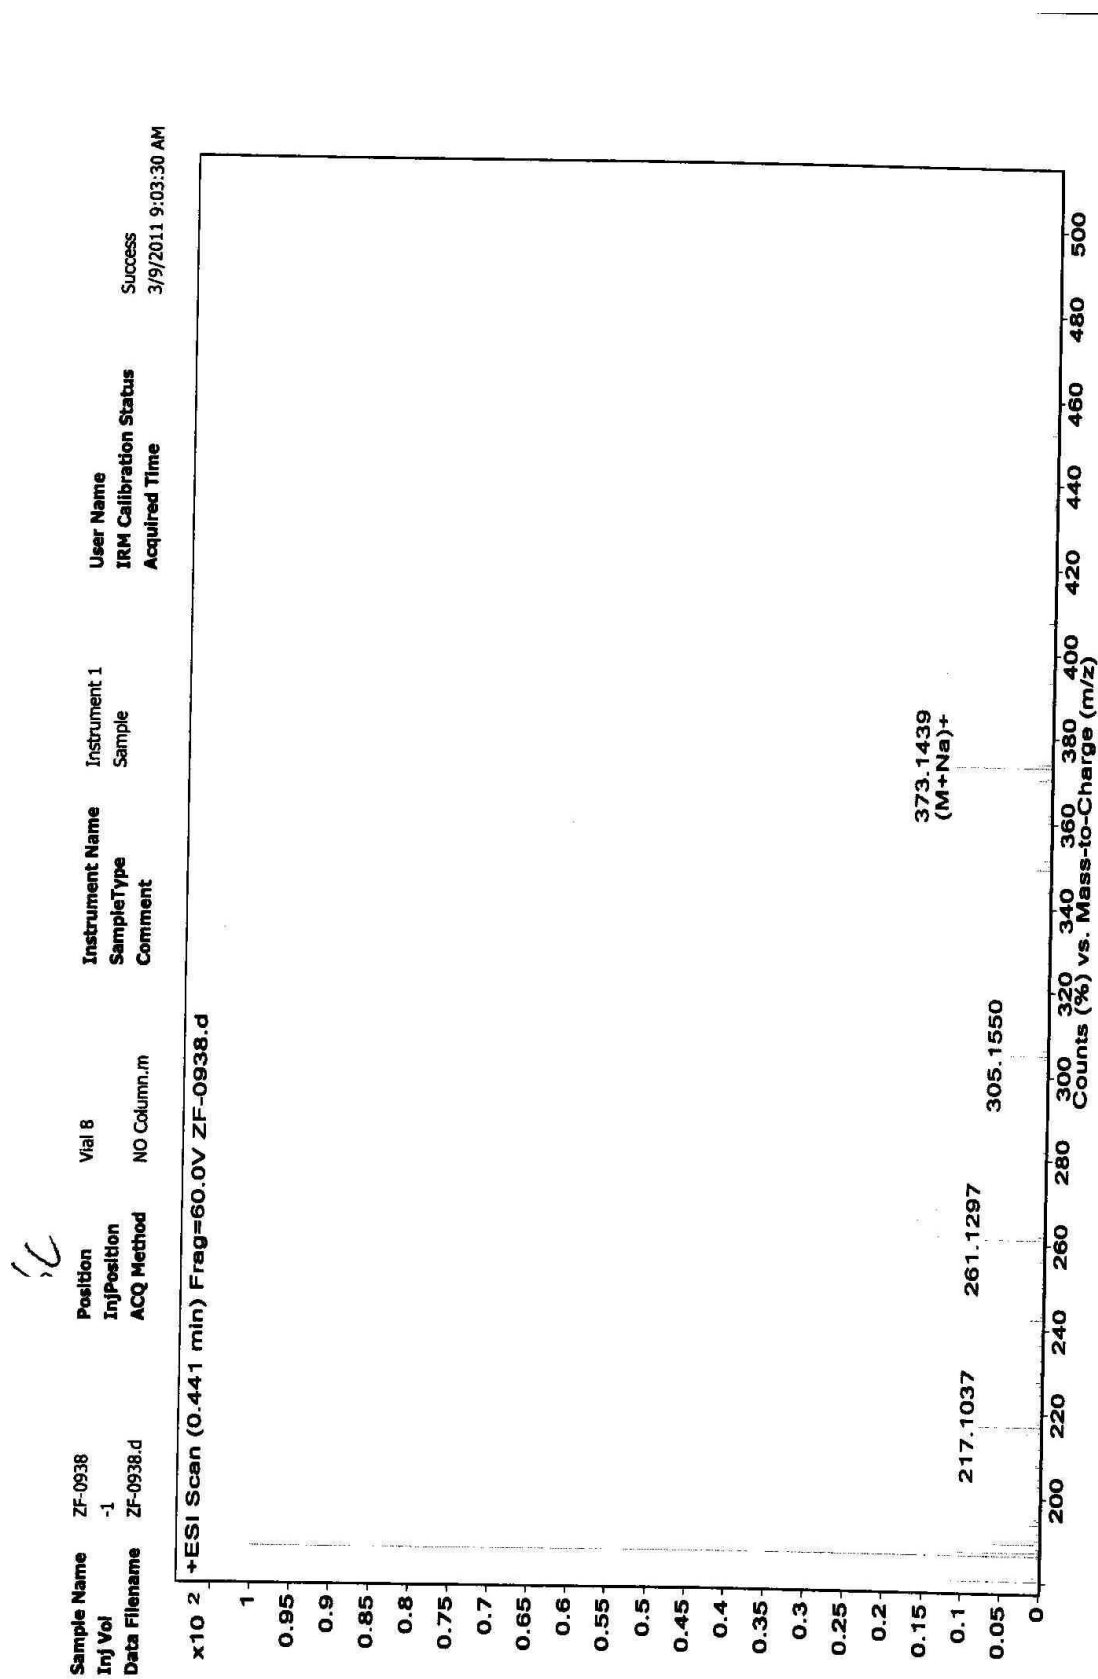

Figure 50.  $^1\text{H}$ -NMR of compound 6d.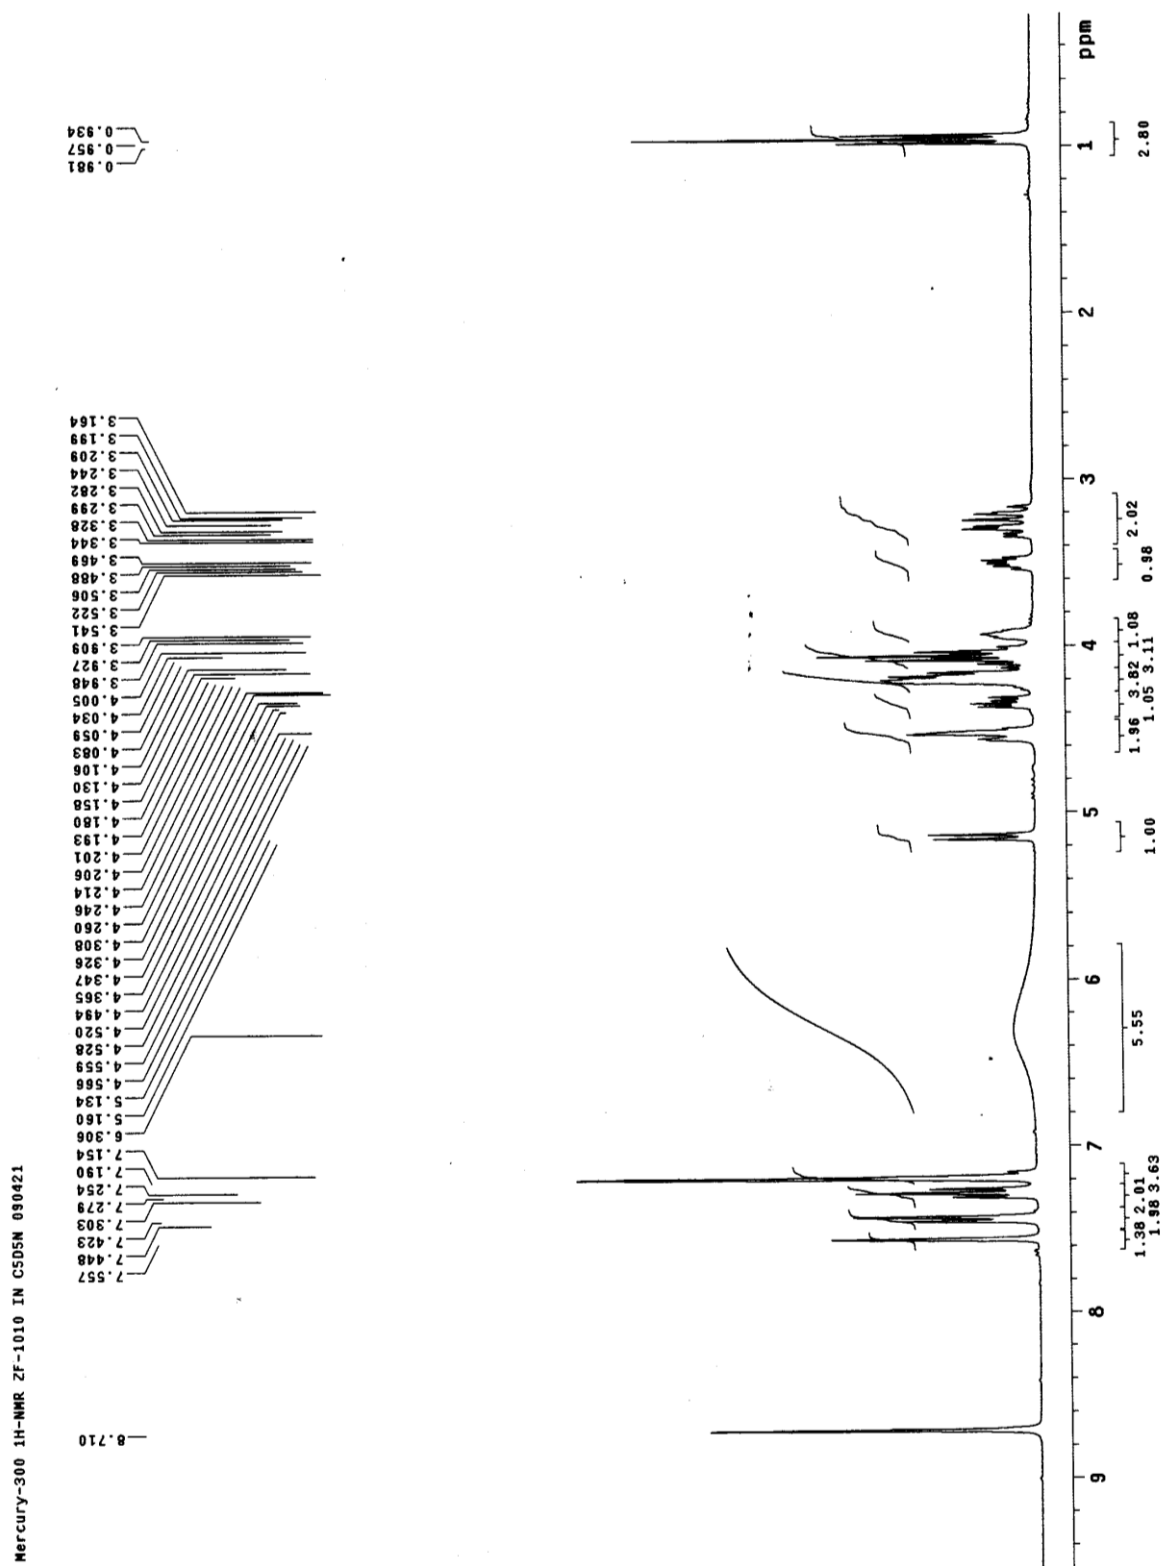

Figure 51. HRMS of compound 6d.

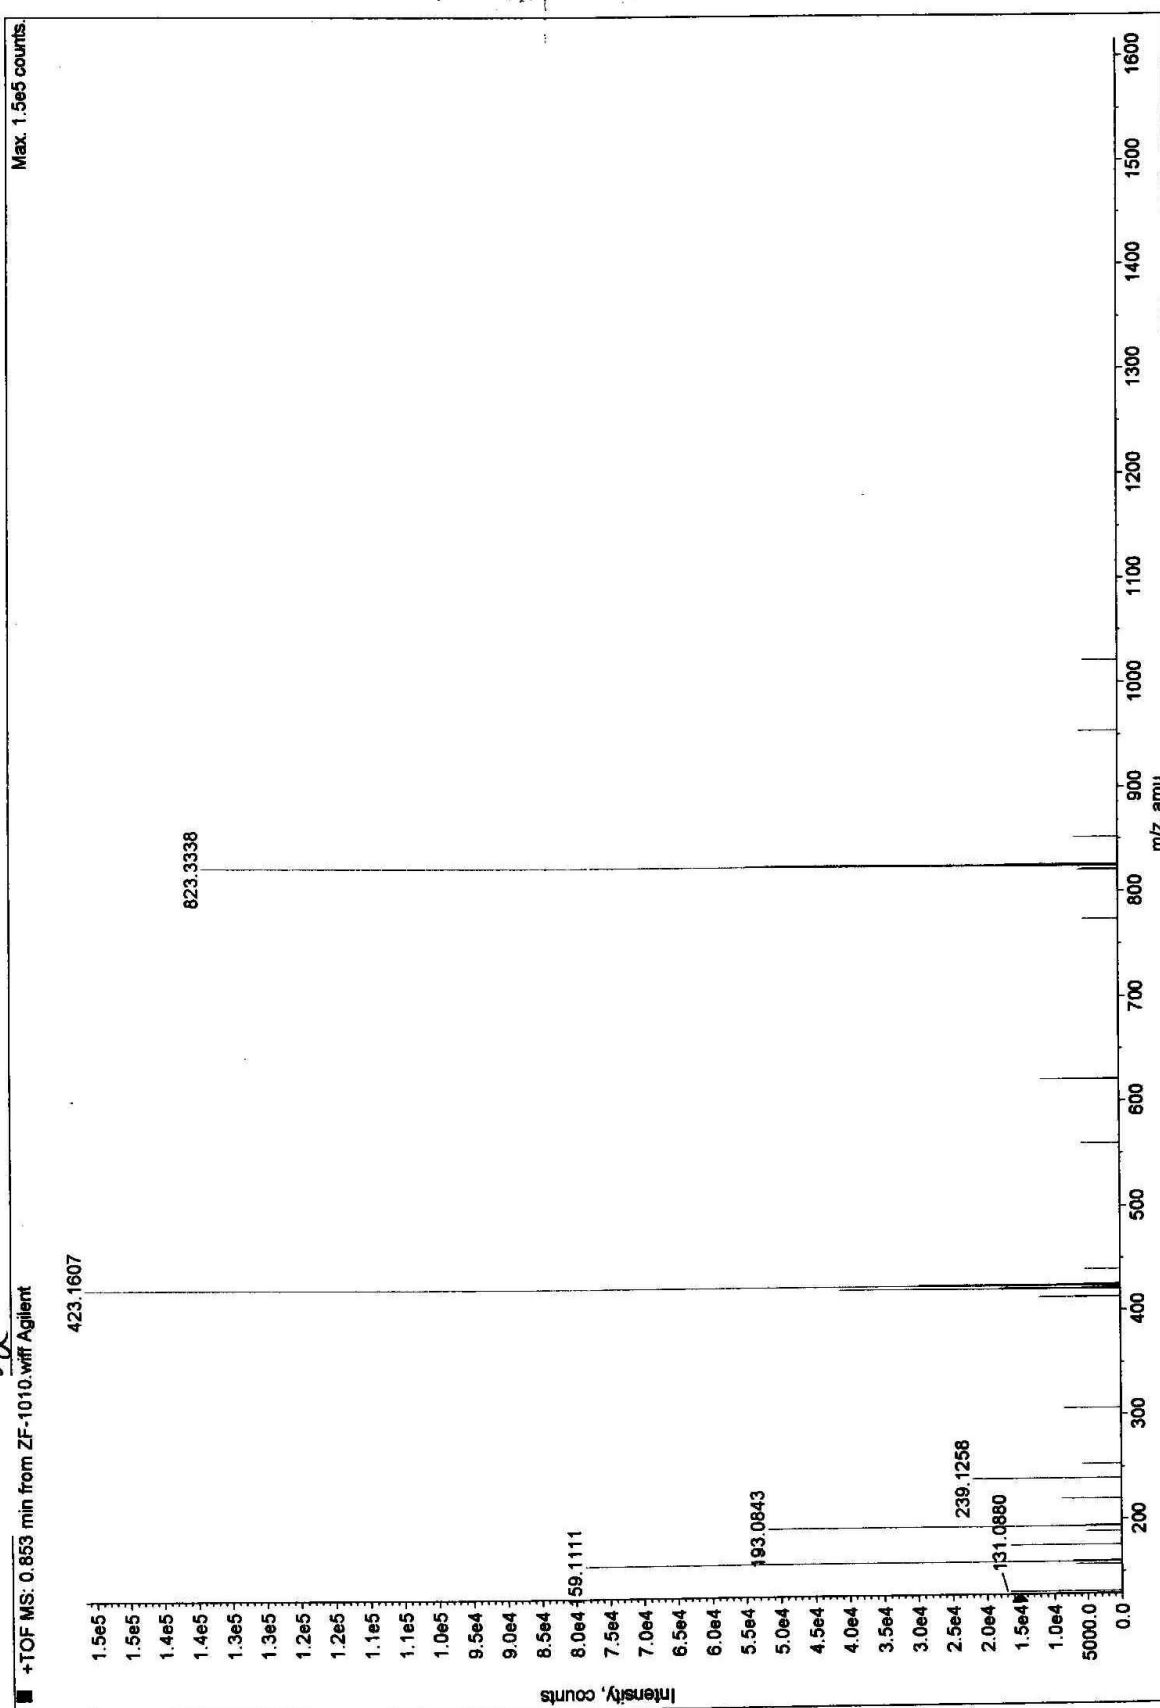

Figure 52.  $^1\text{H}$ -NMR of compound 6e.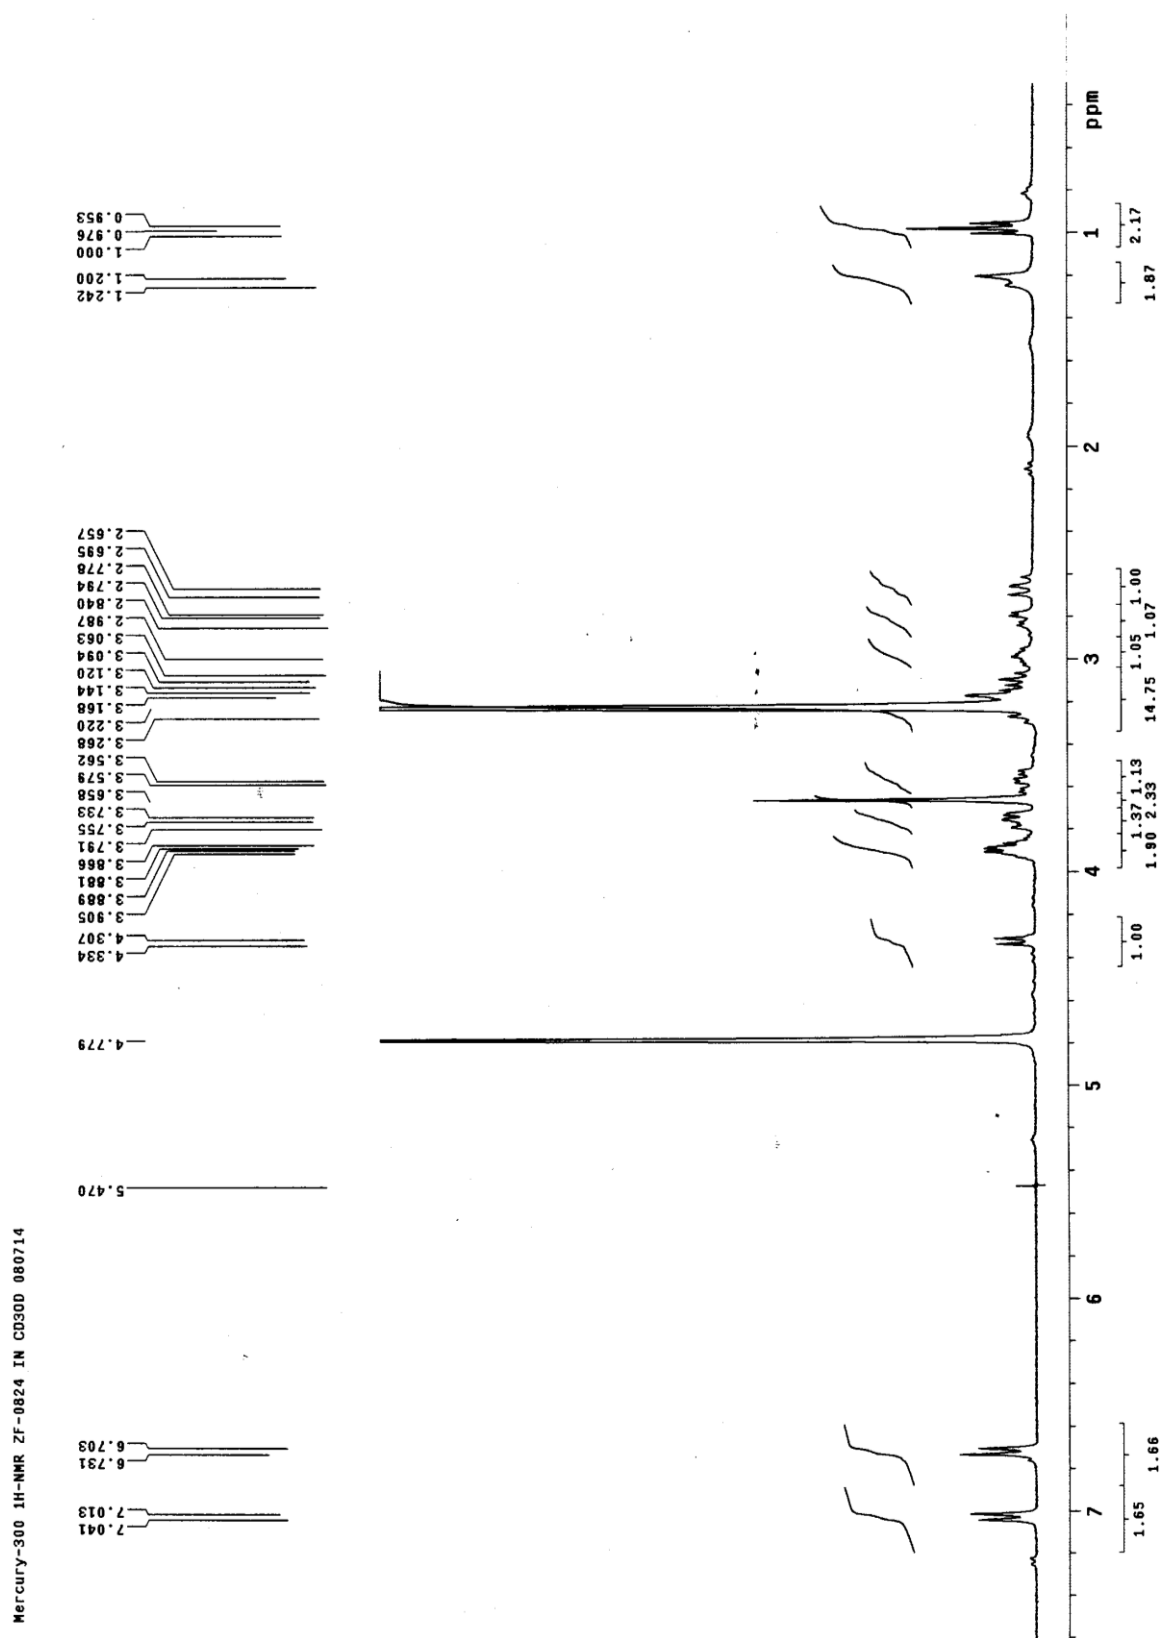



Figure 53. HRMS of compound 6e.

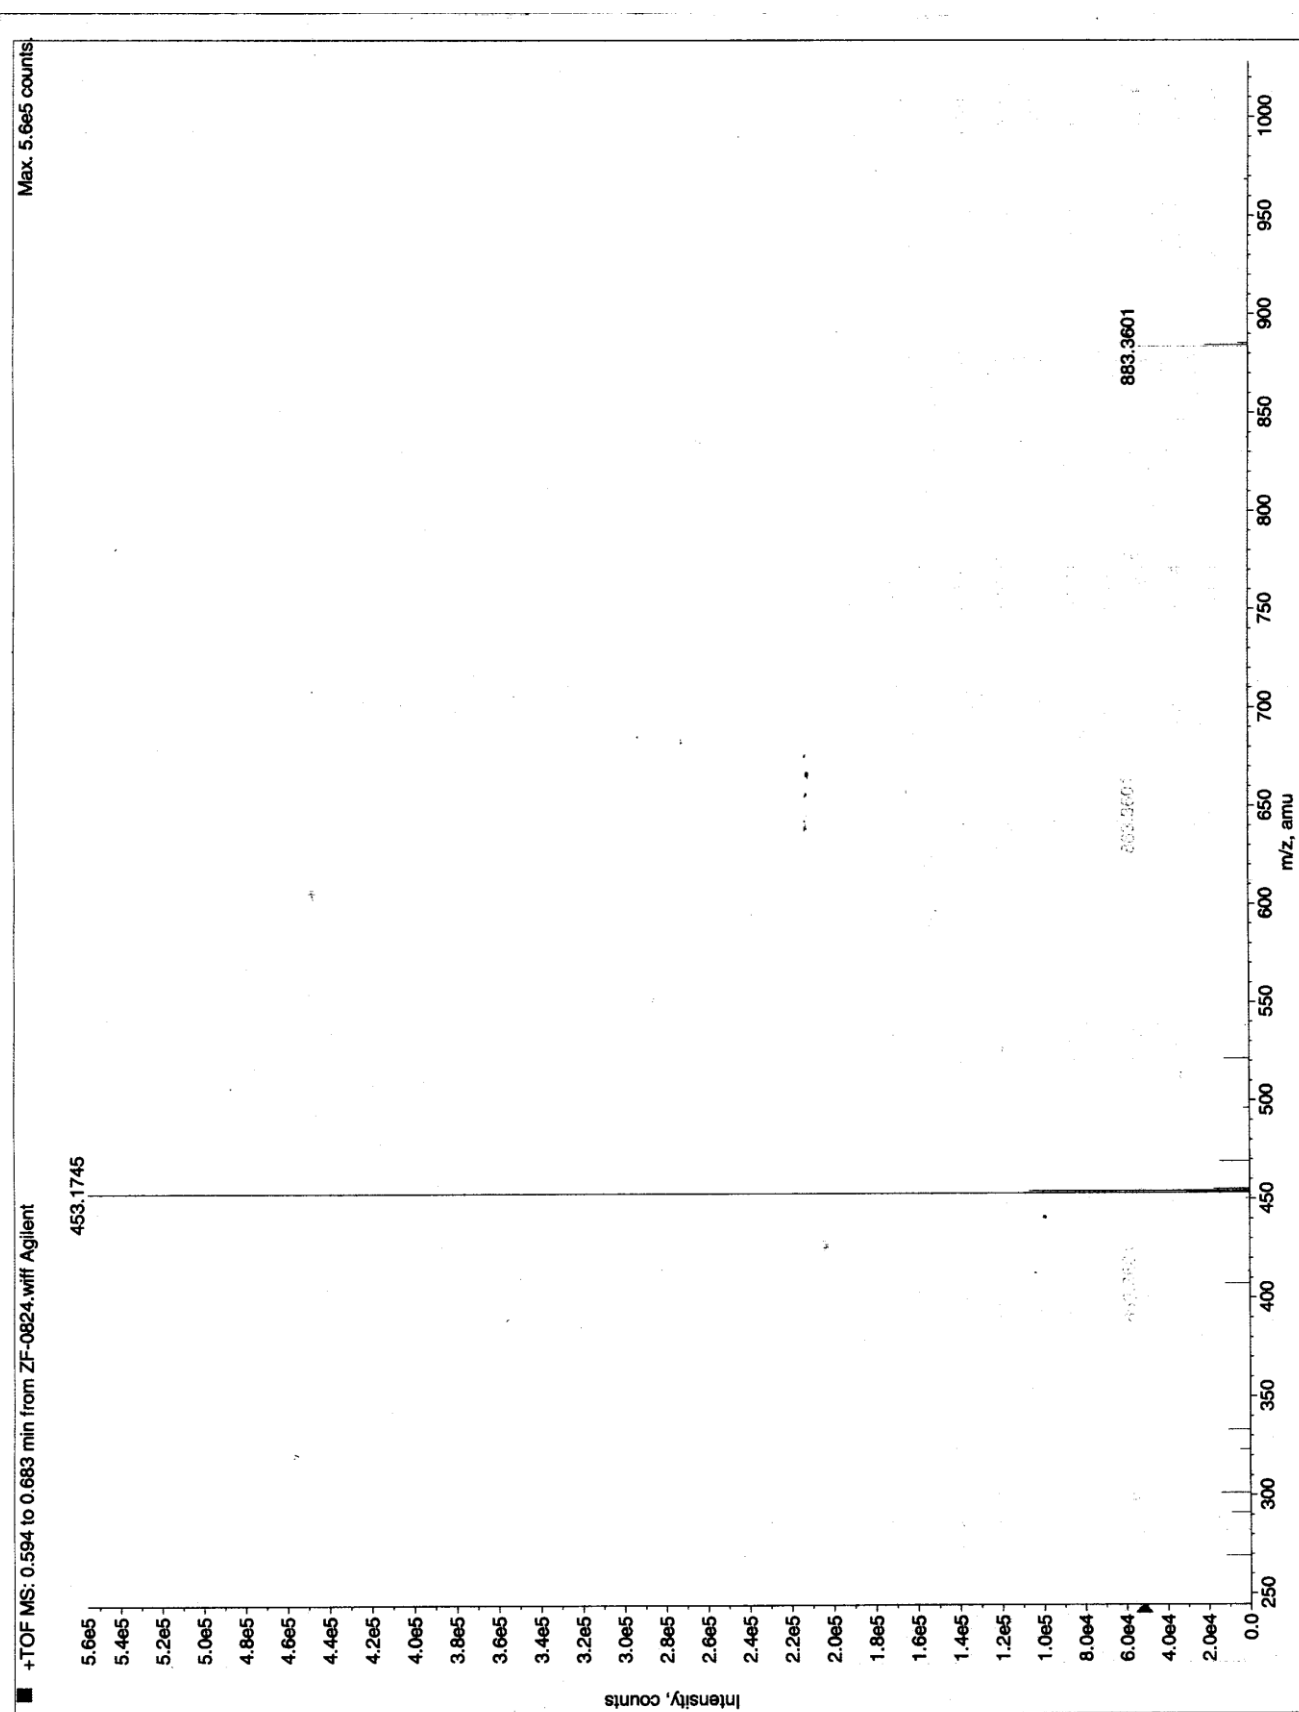

Figure S54.  $^1\text{H}$ -NMR of compound 7a.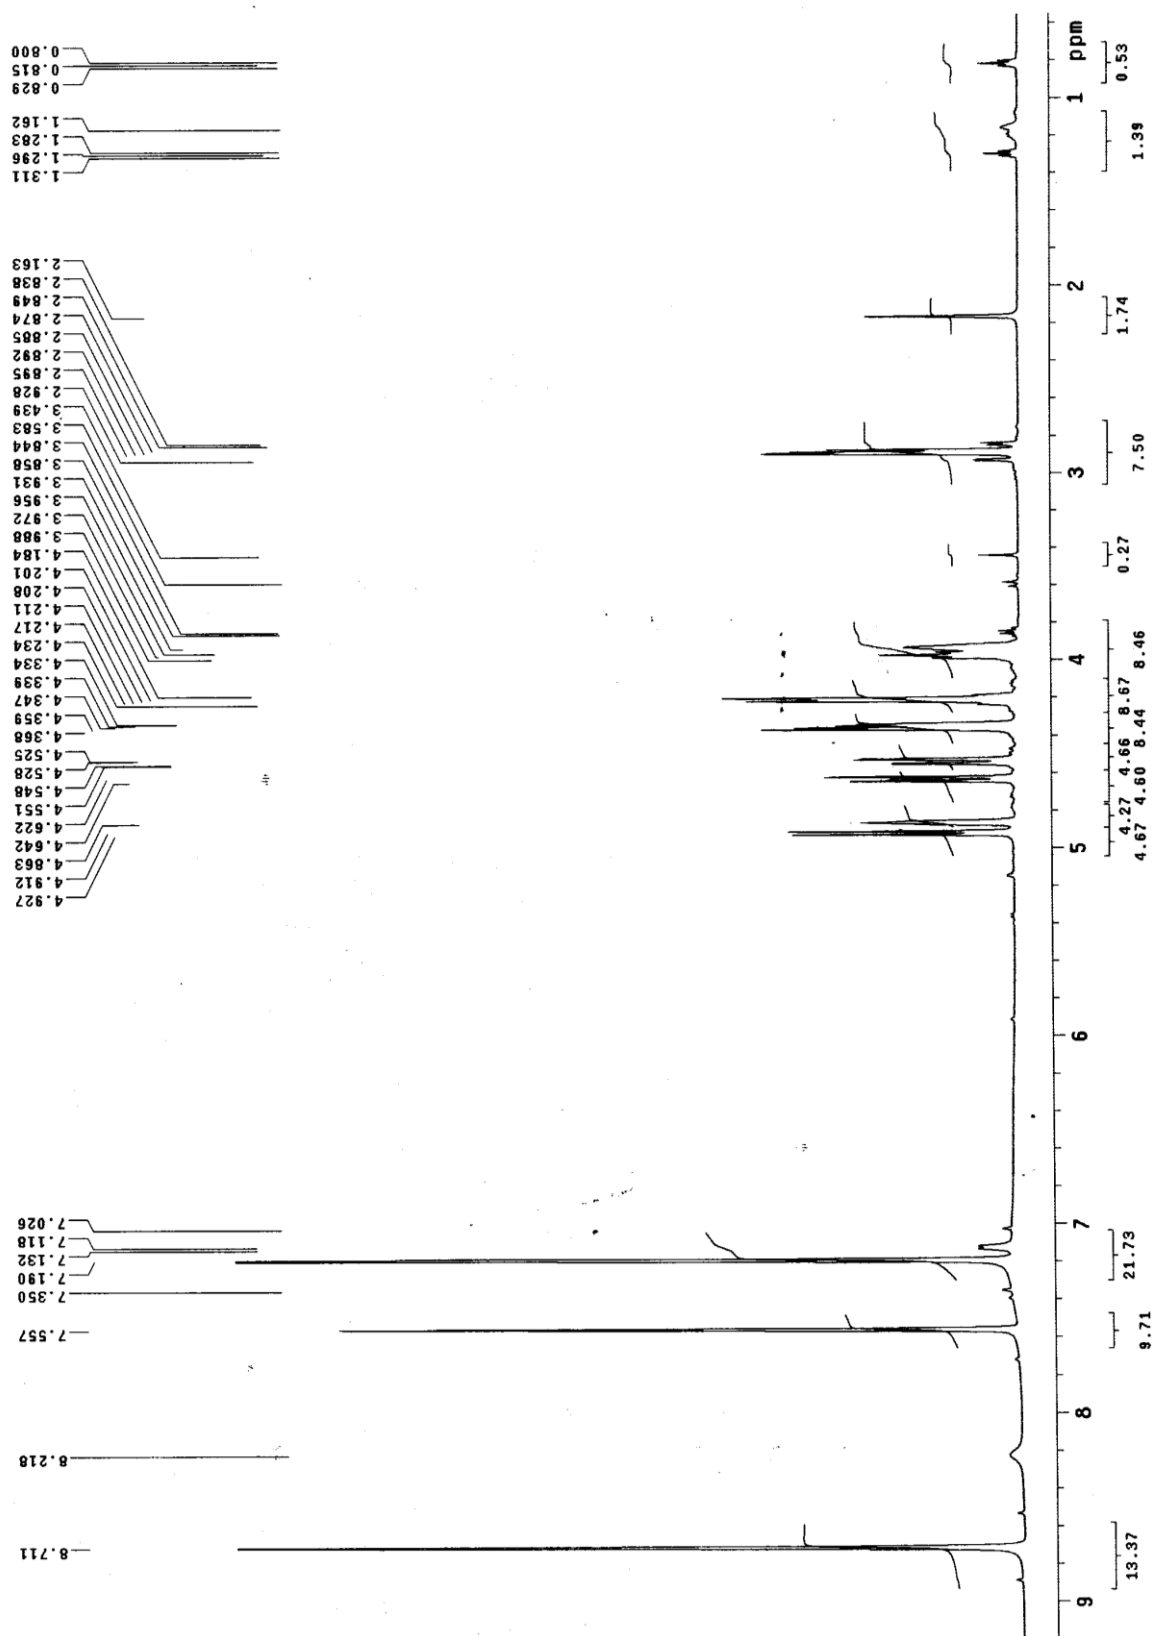

Figure 55.  $^{13}\text{C}$ -NMR of compound 7a.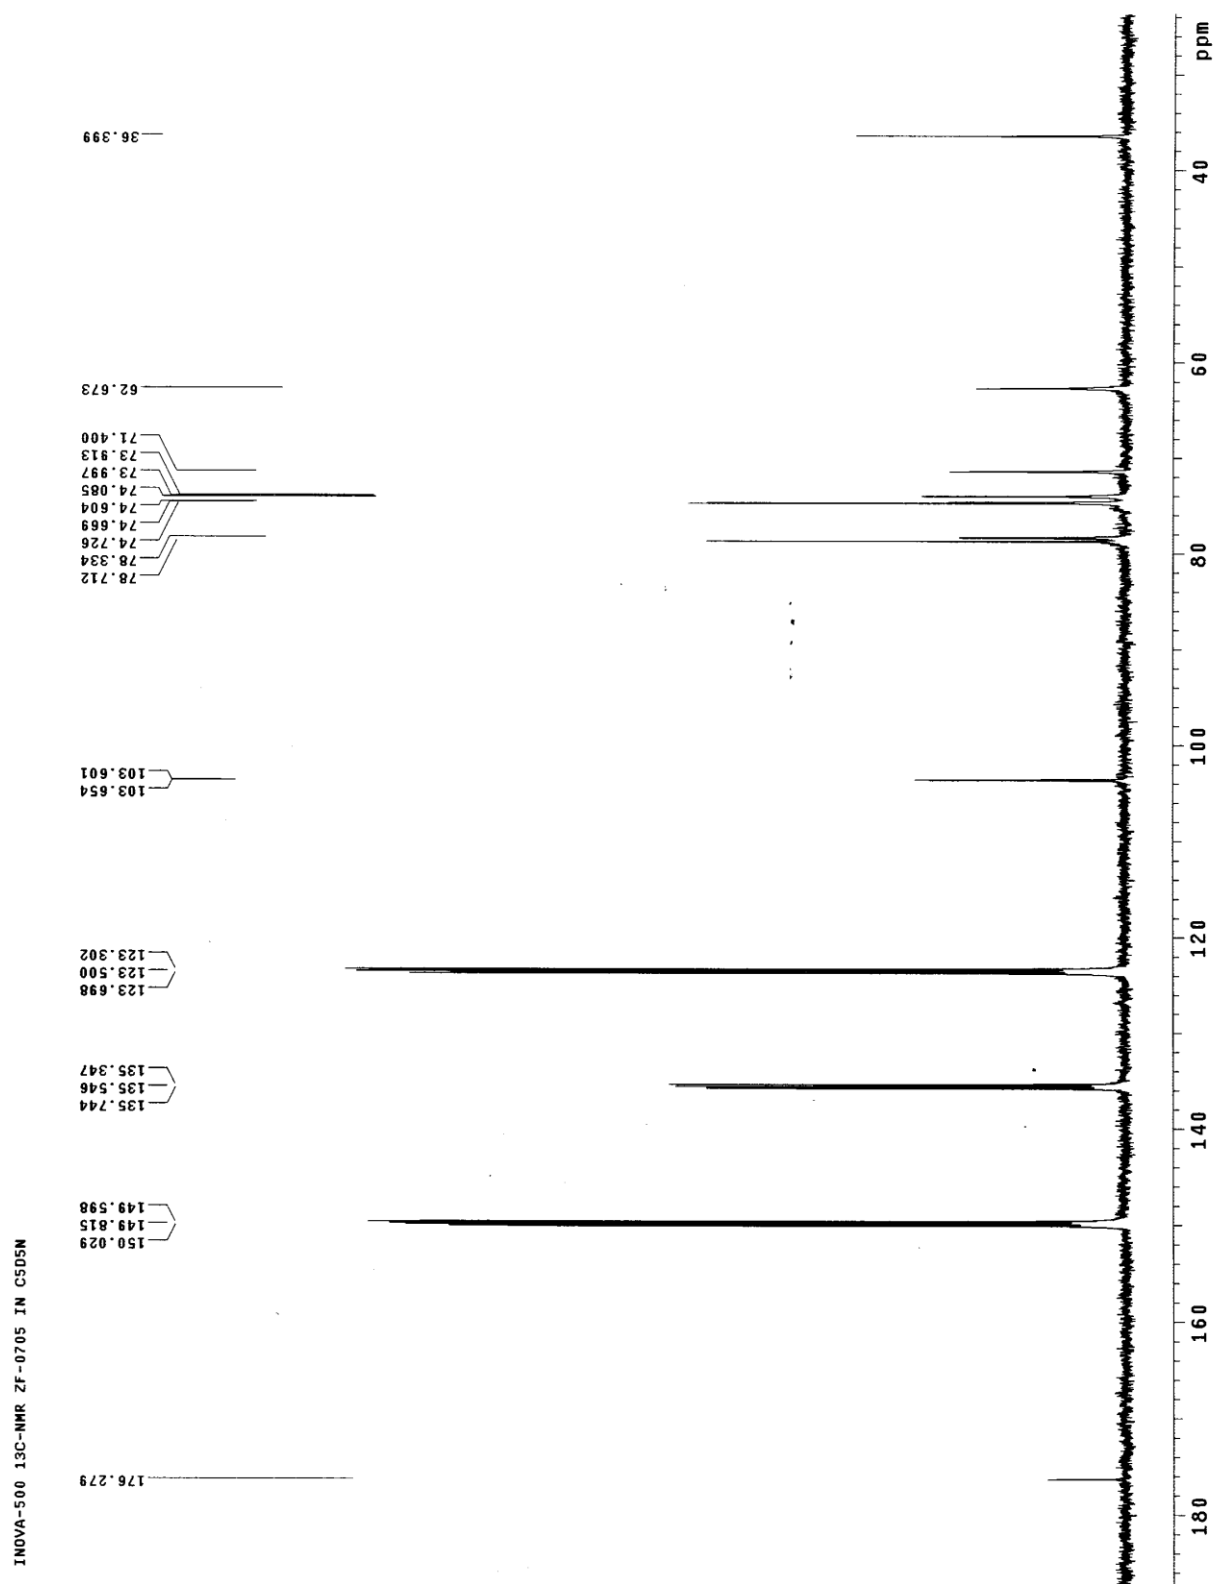

Figure S6. HRMS of compound 7a.

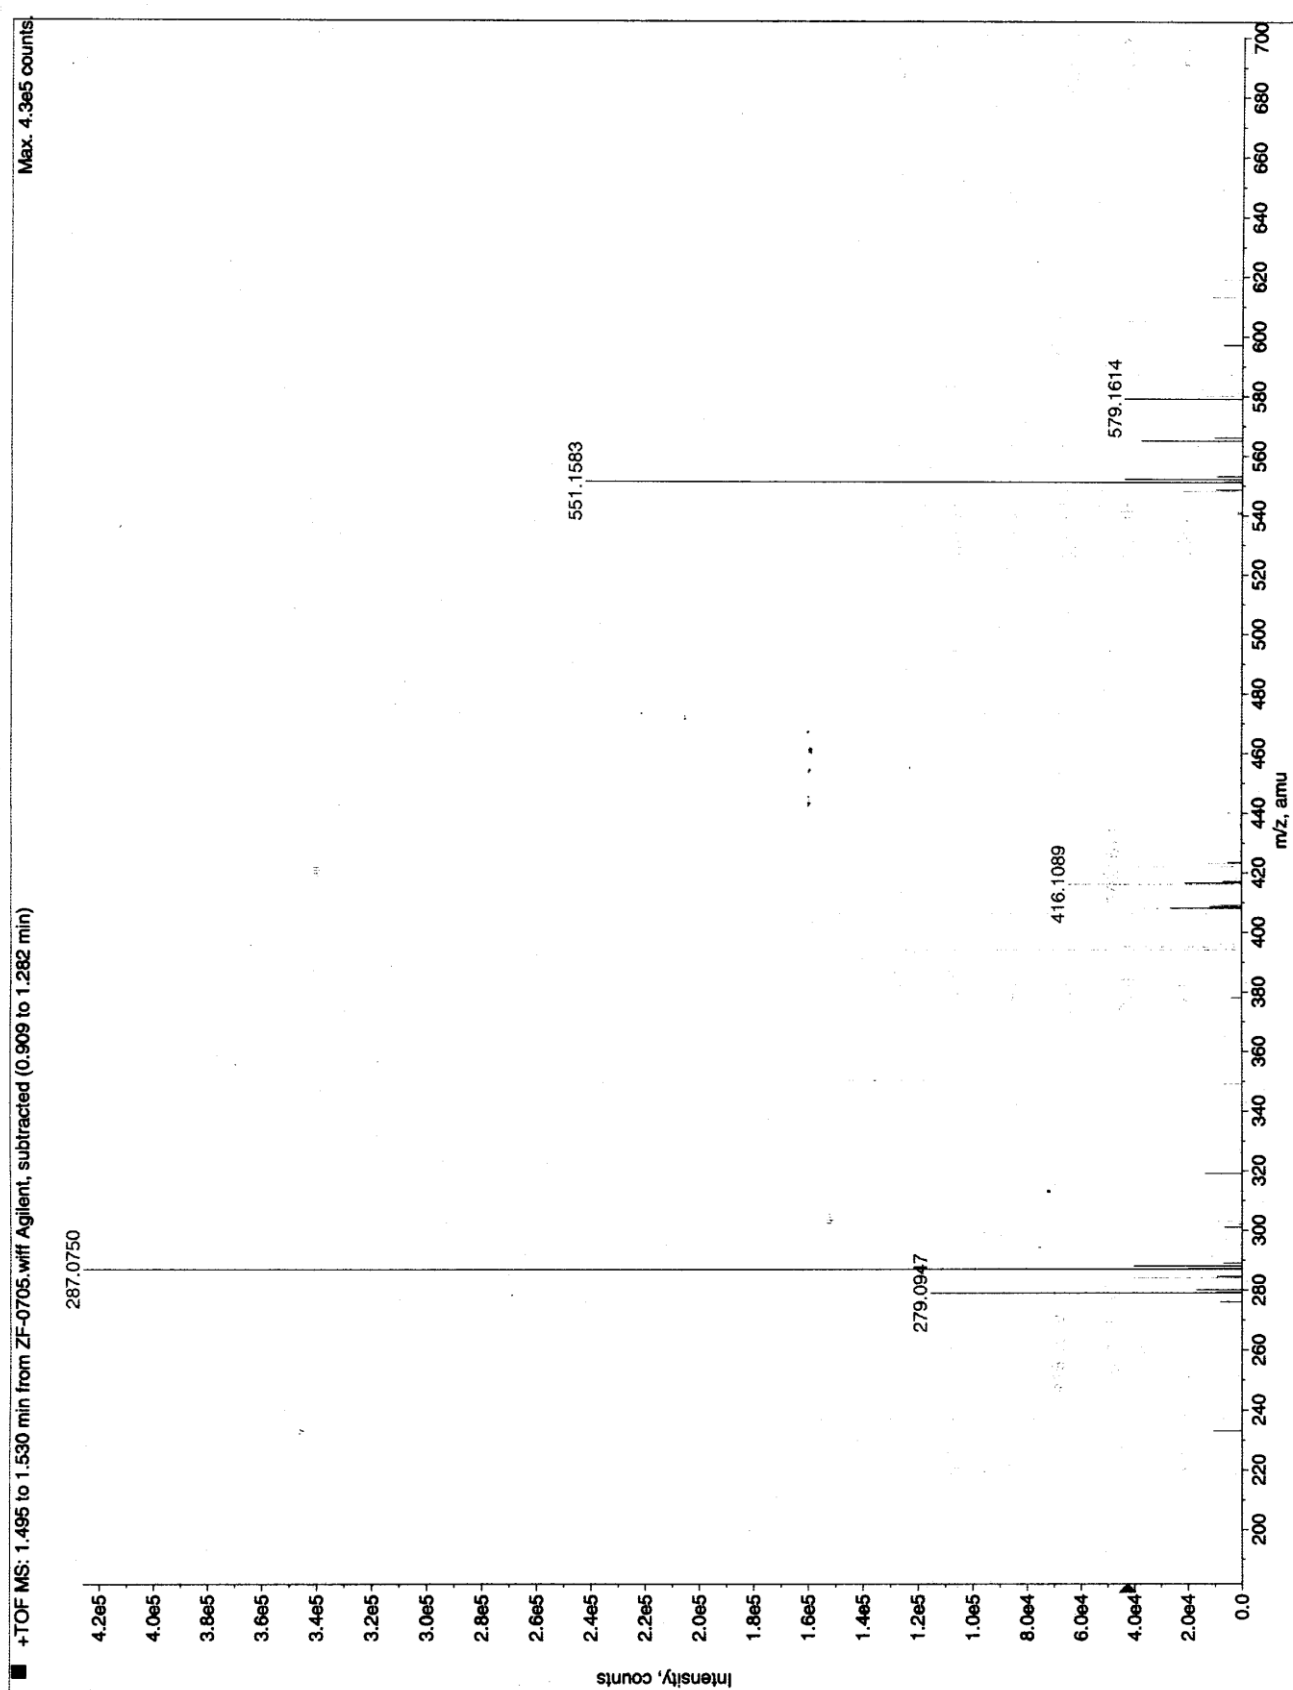

Figure S7.  $^1\text{H}$ -NMR of compound 7b.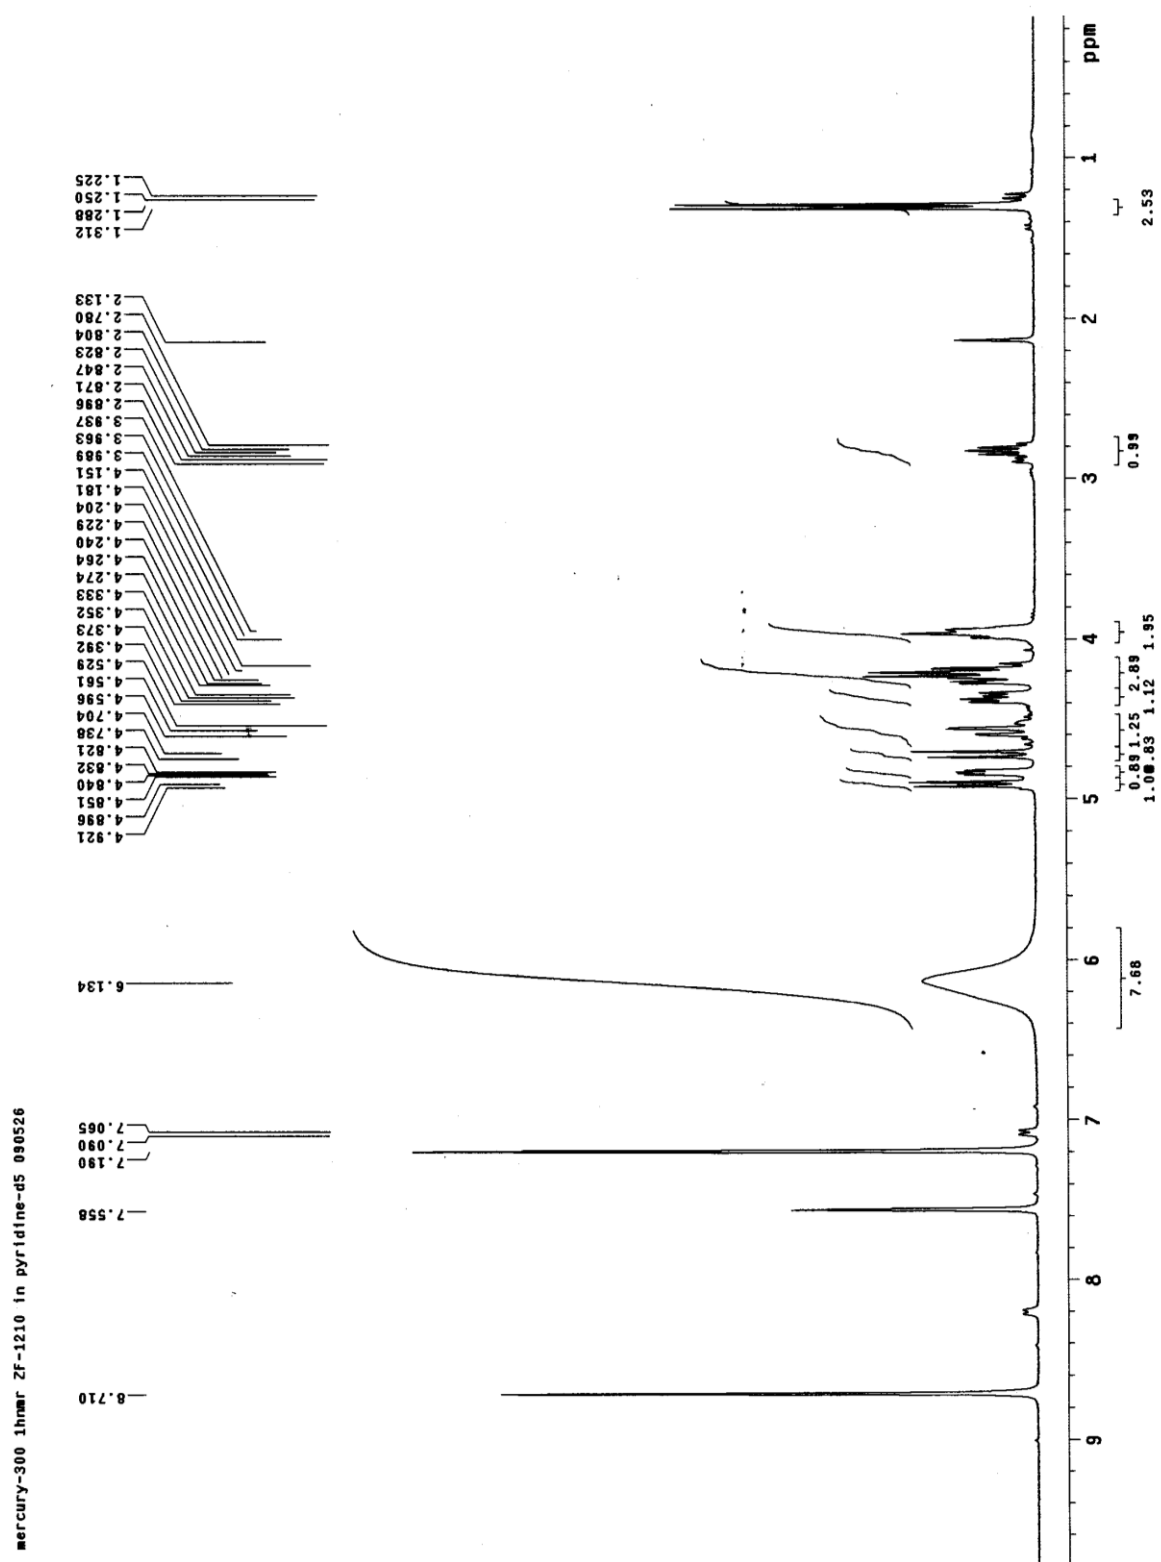

**Figure 58.**  $^{13}\text{C}$ -NMR of compound 7b.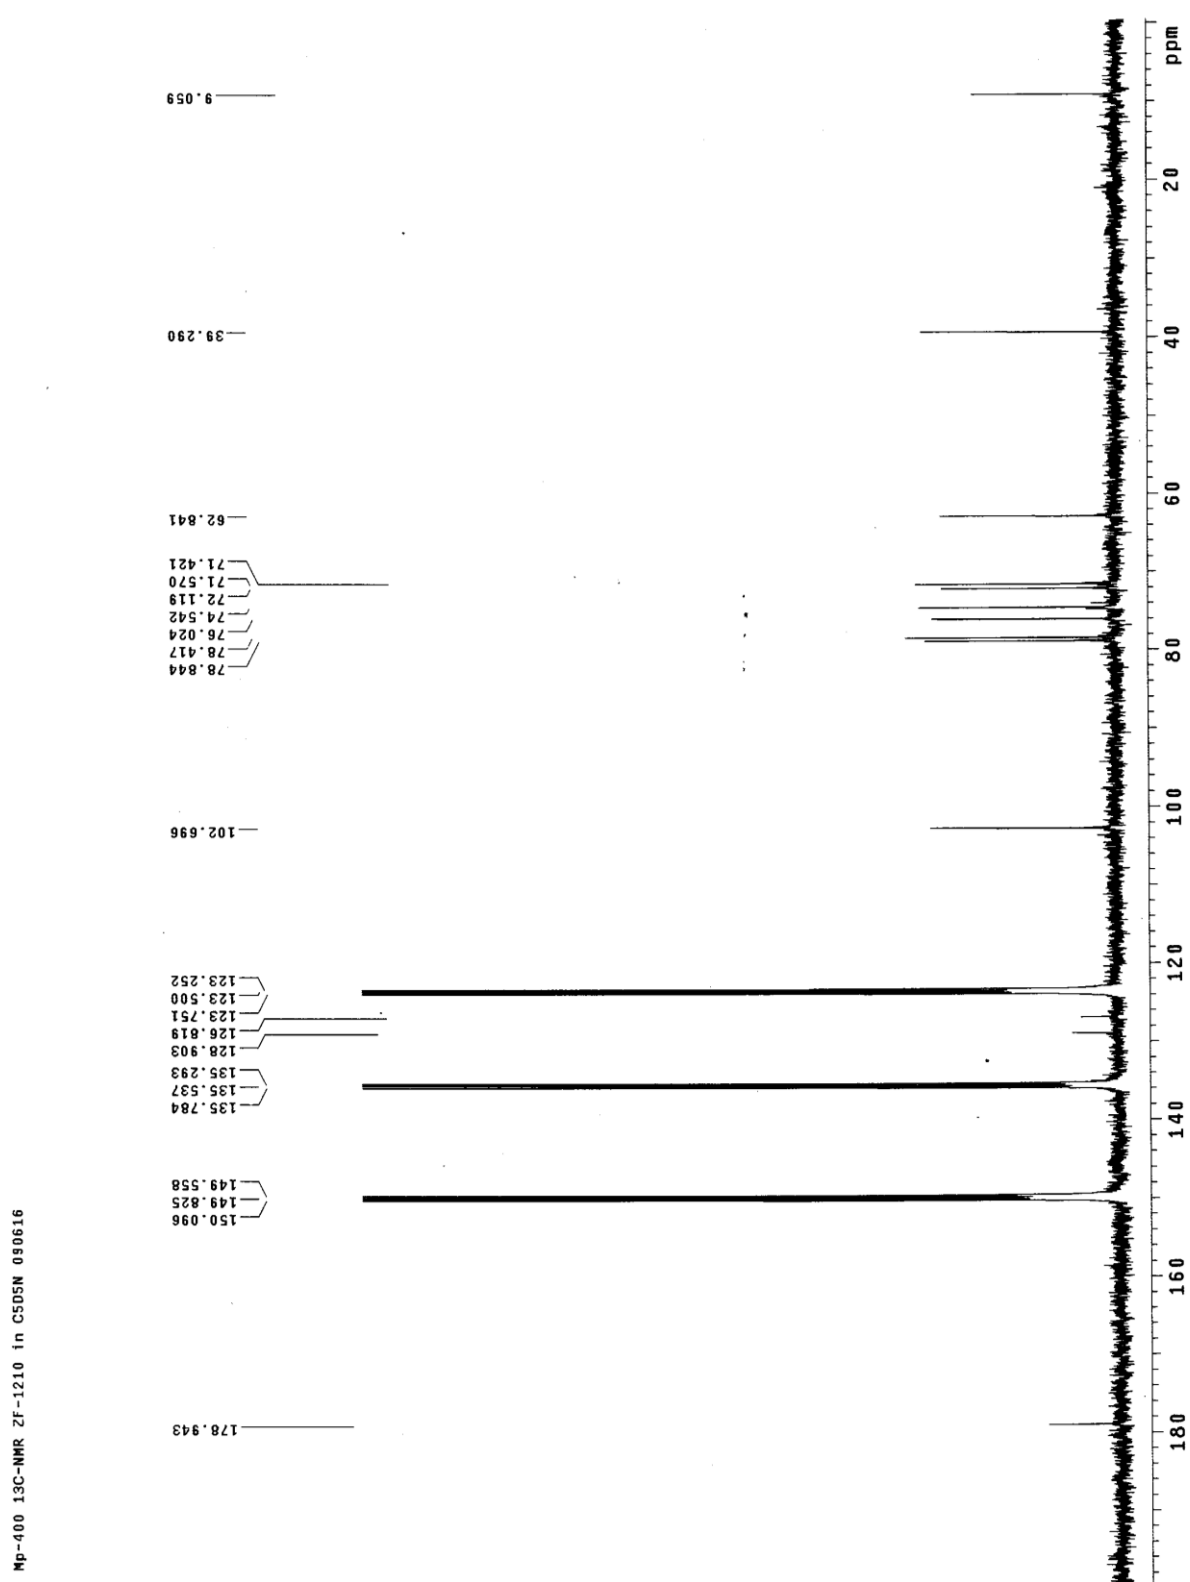

Figure 59. HRMS of compound 7b.

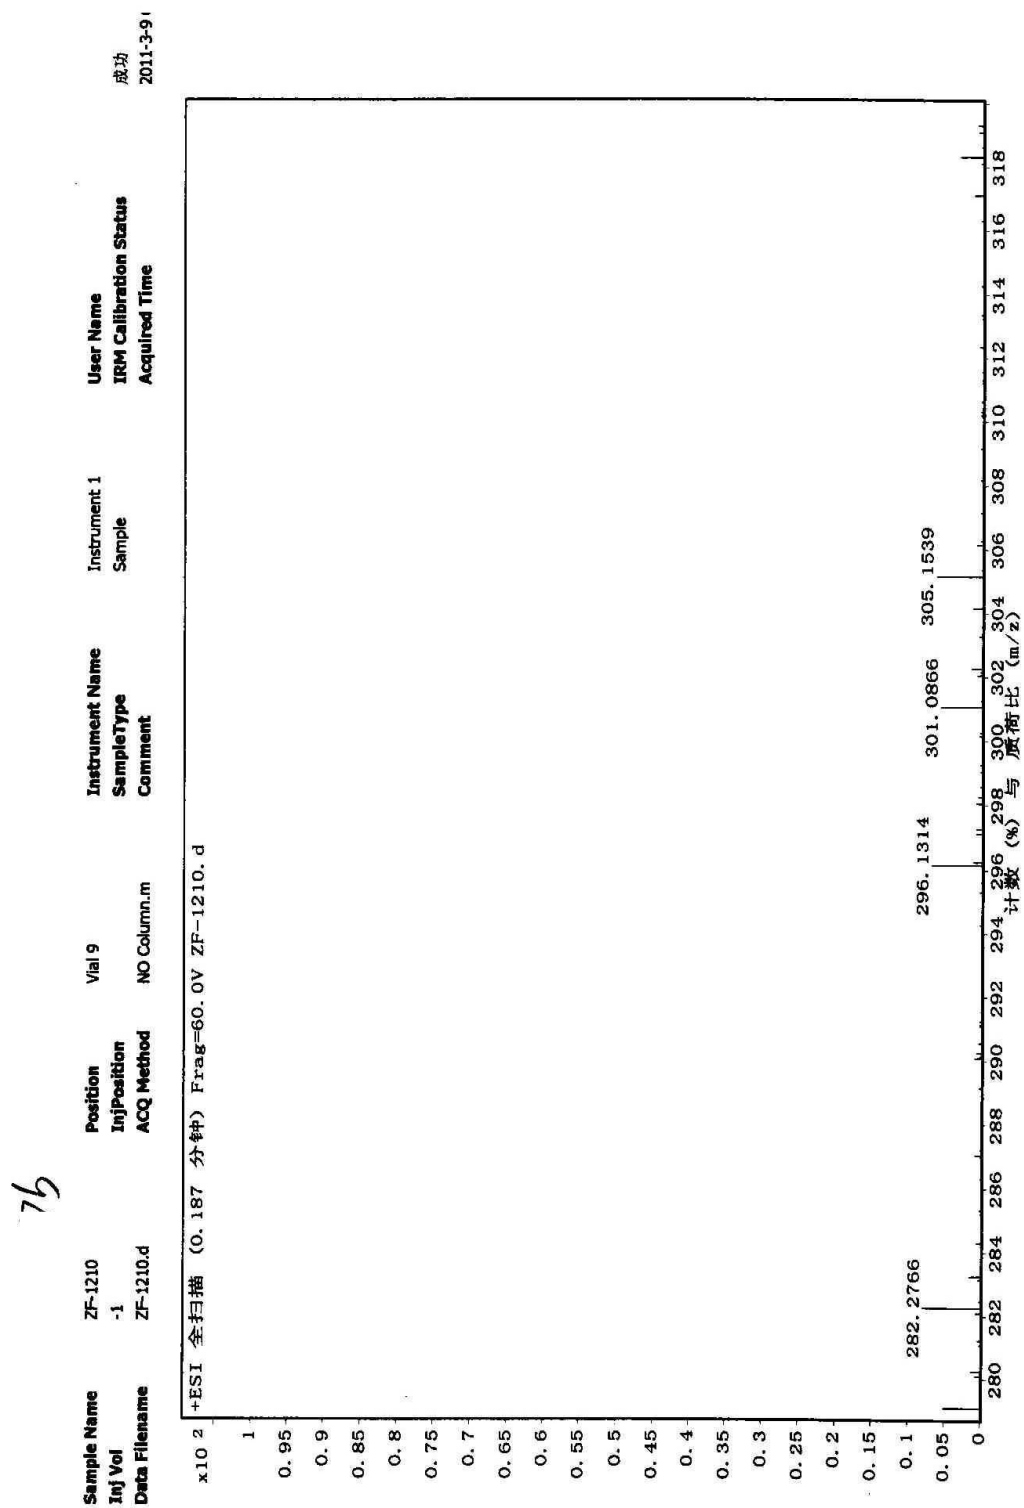

Figure 60.  $^1\text{H}$ -NMR of compound 7c.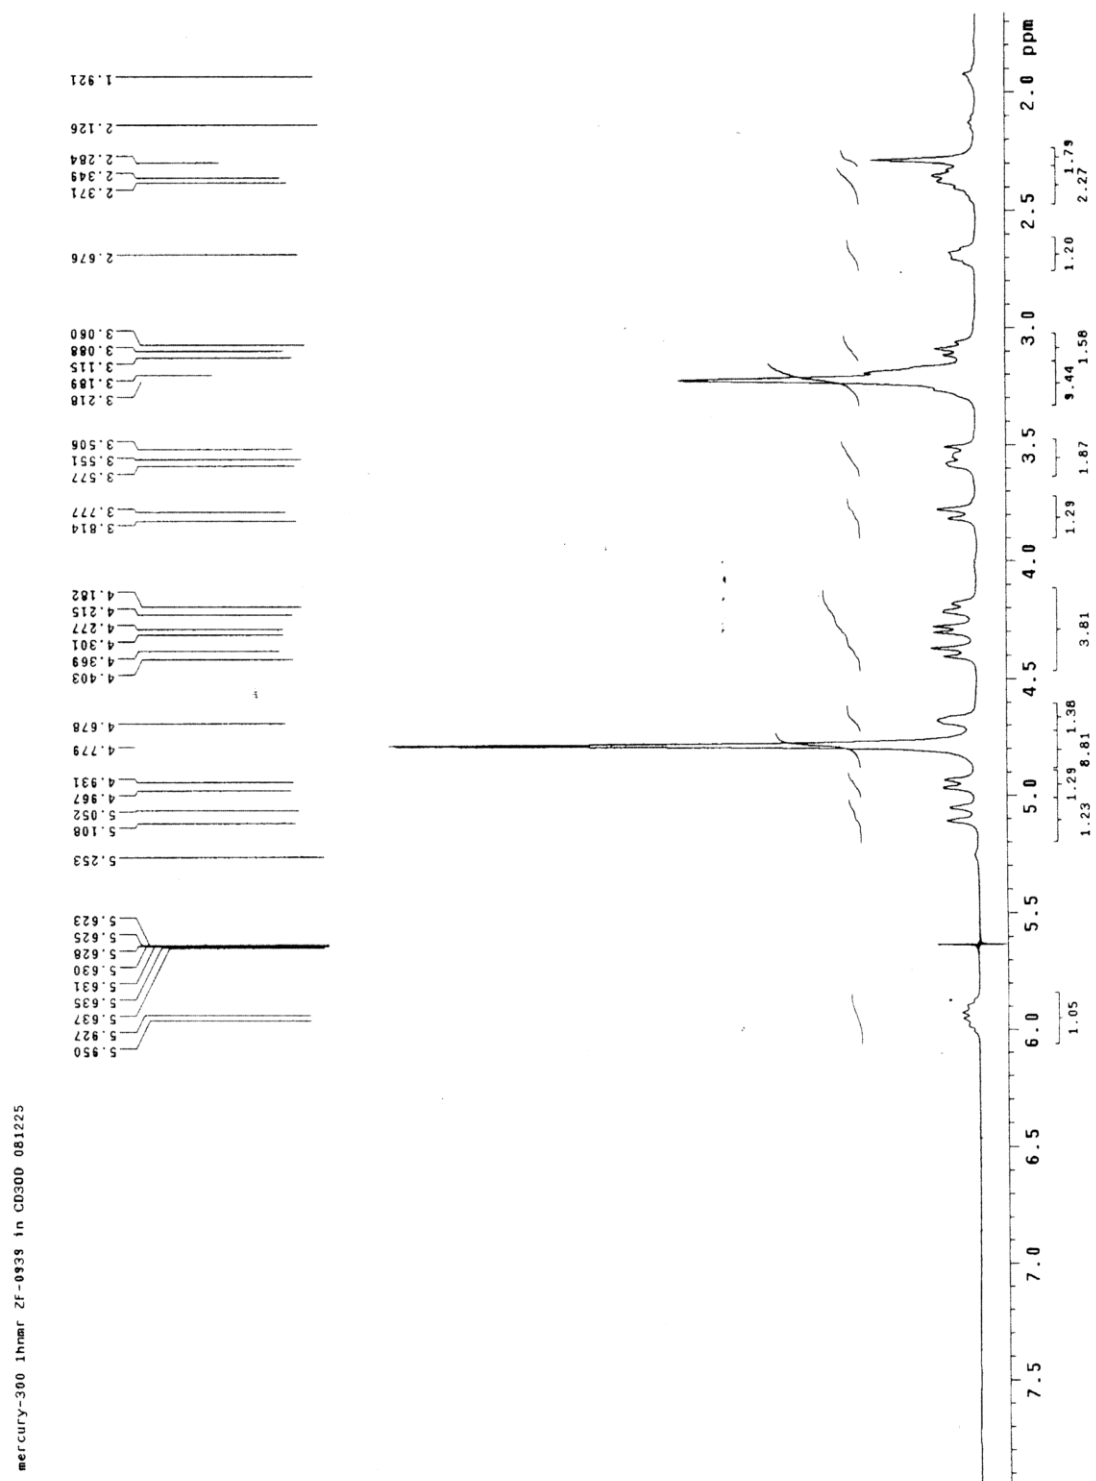



Figure 61.  $^{13}\text{C}$ -NMR of compound 7c.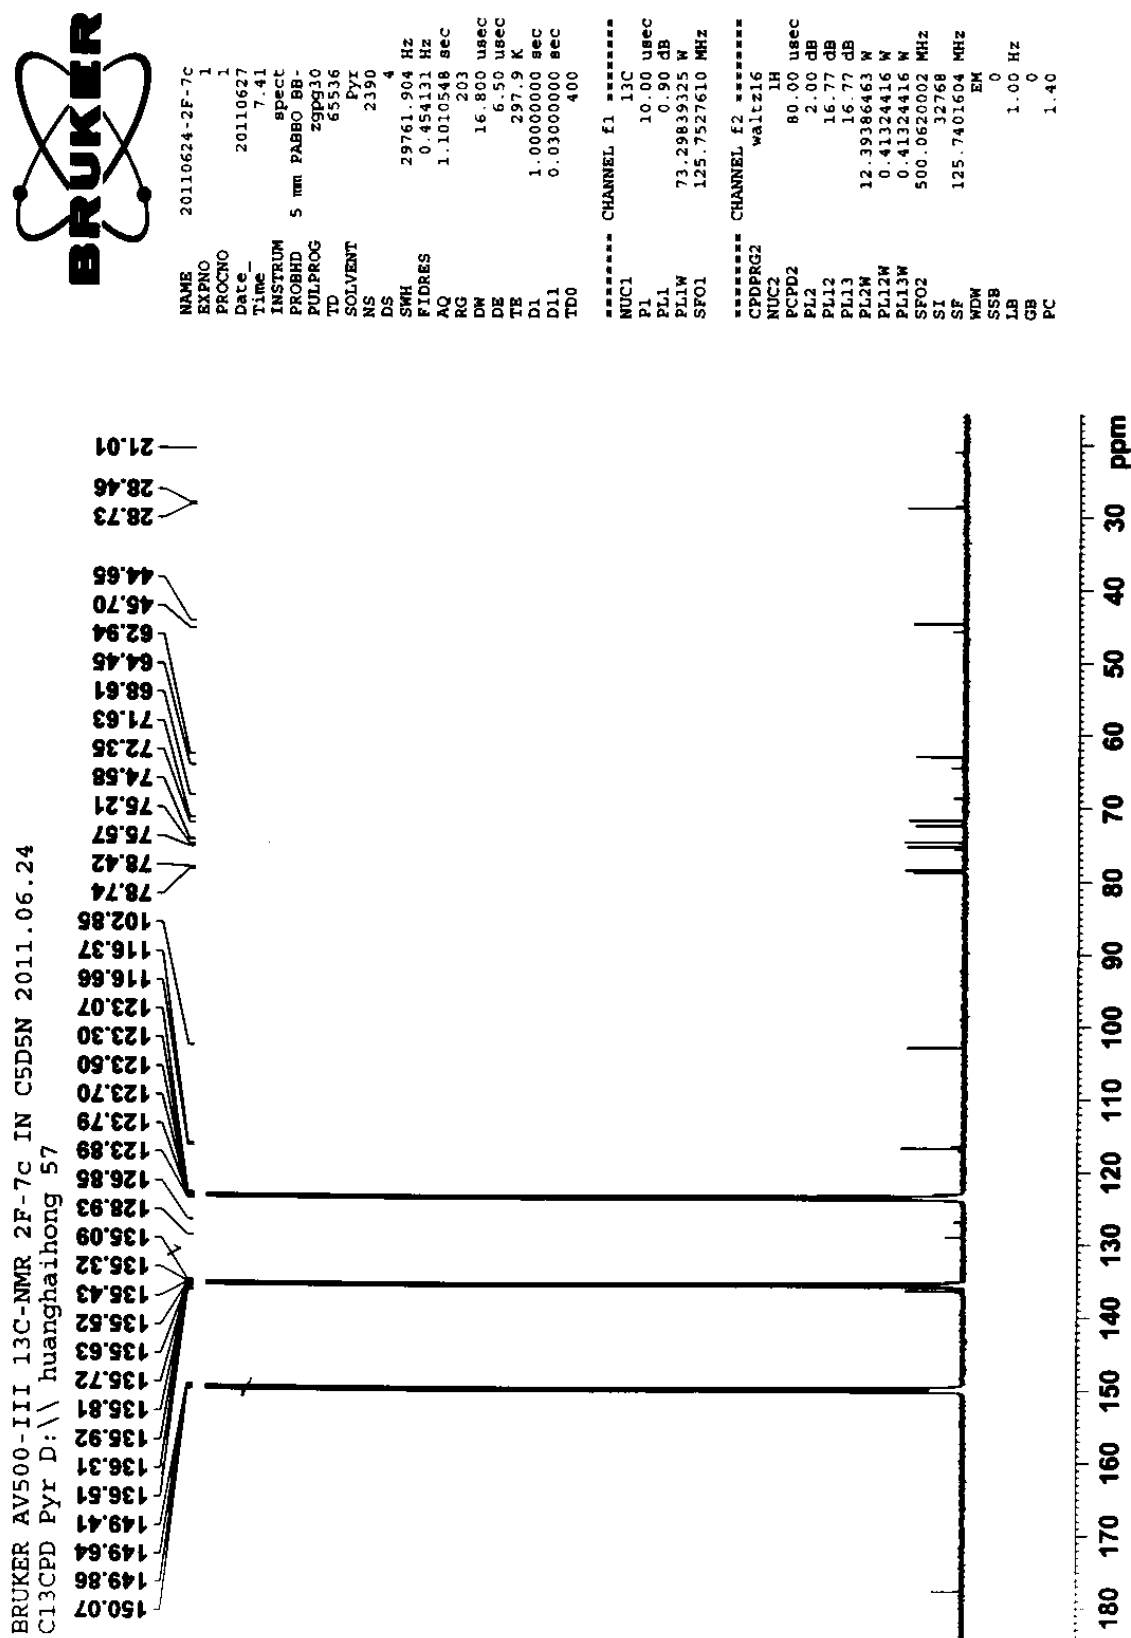

Figure 62. HRMS of compound 7c.

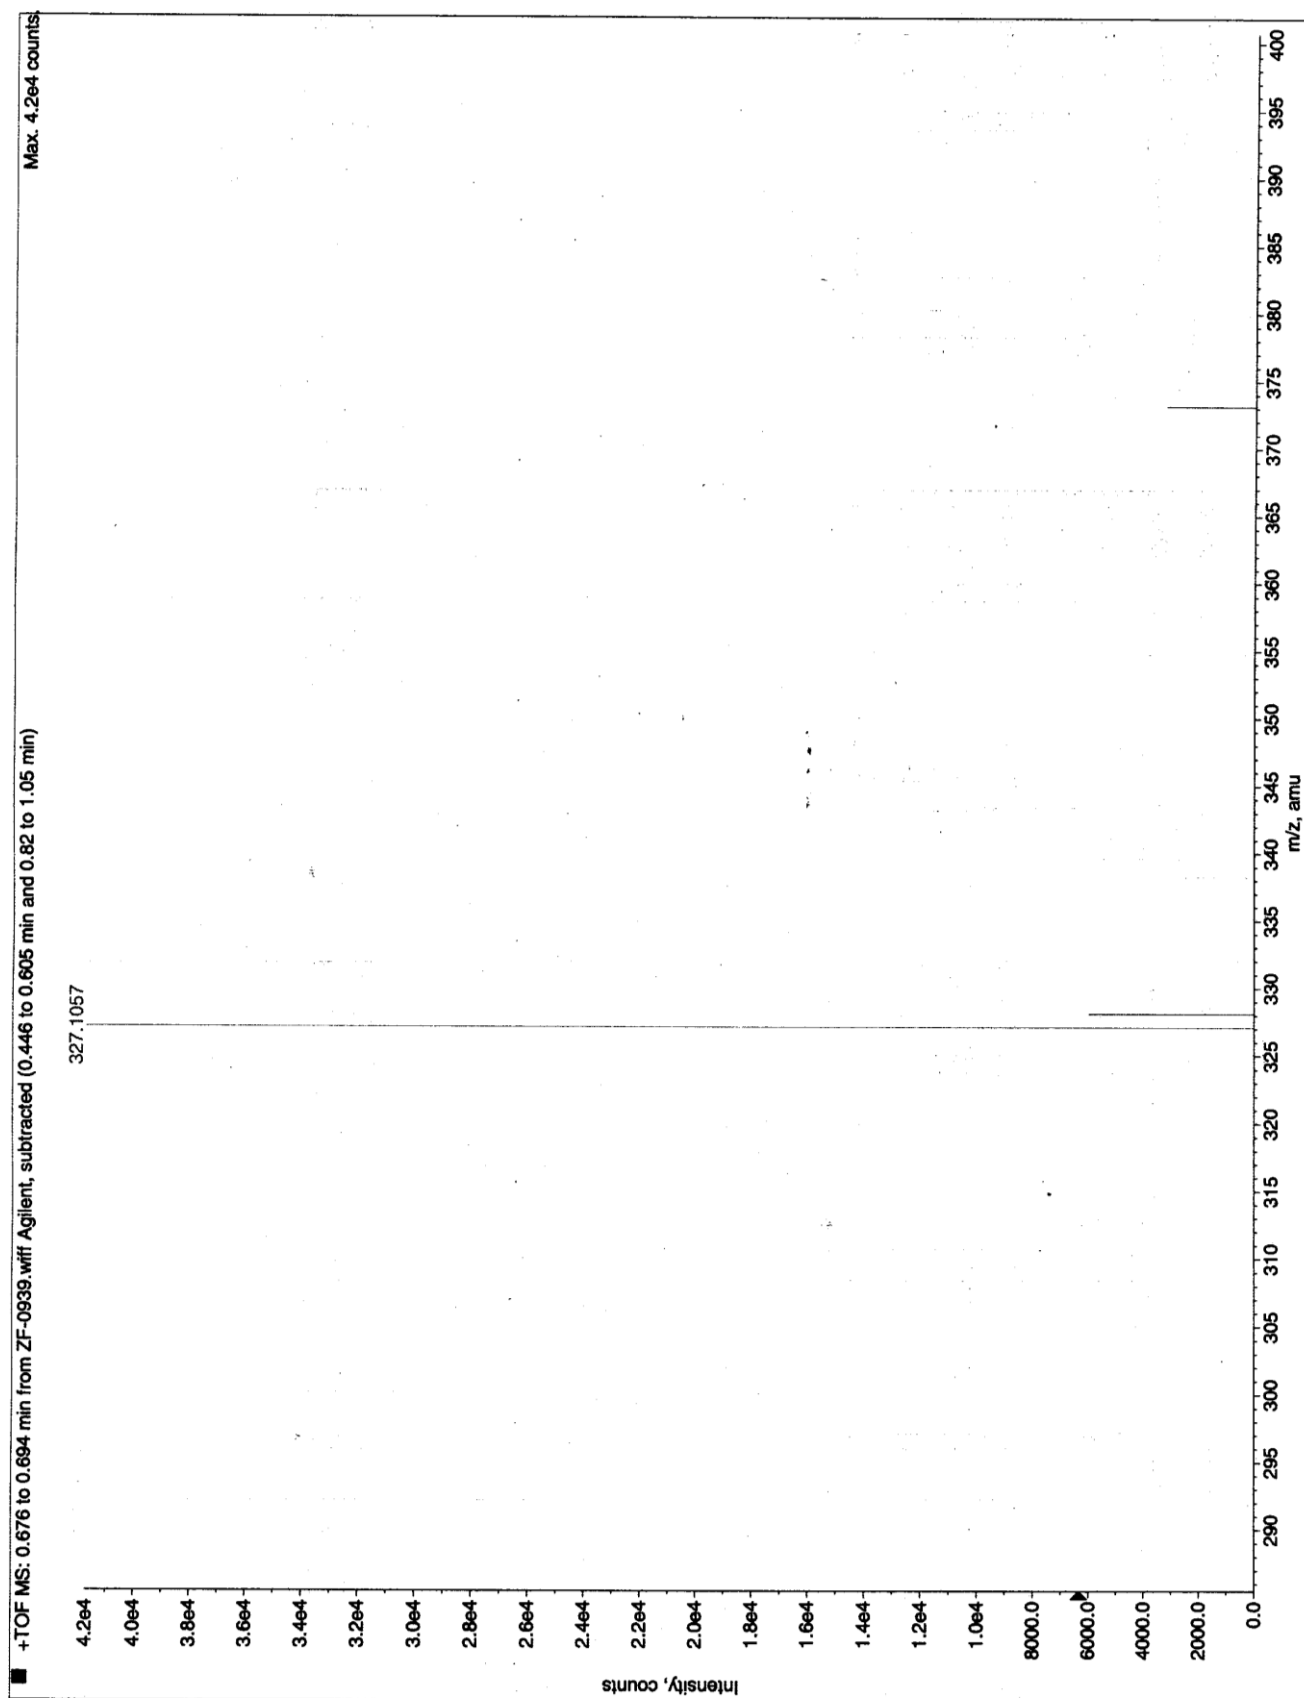

Figure 63.  $^1\text{H}$ -NMR of compound 7d.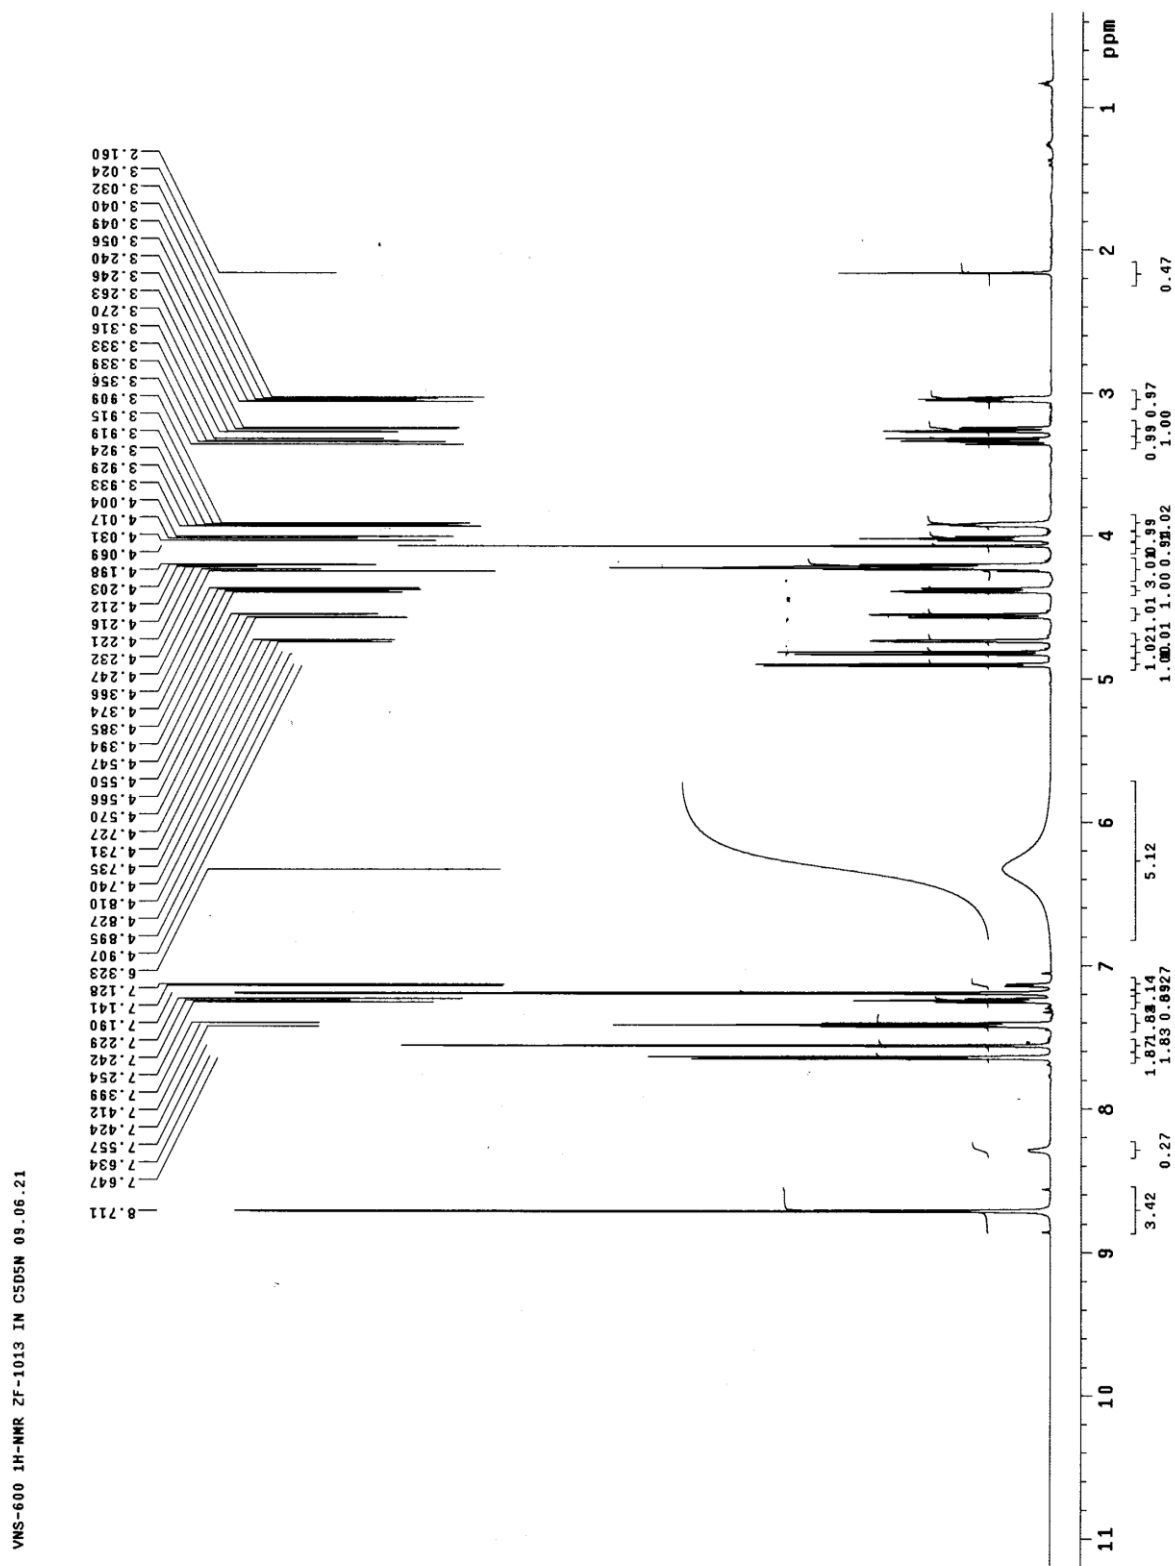

Figure 64. NOE of compound 7d.

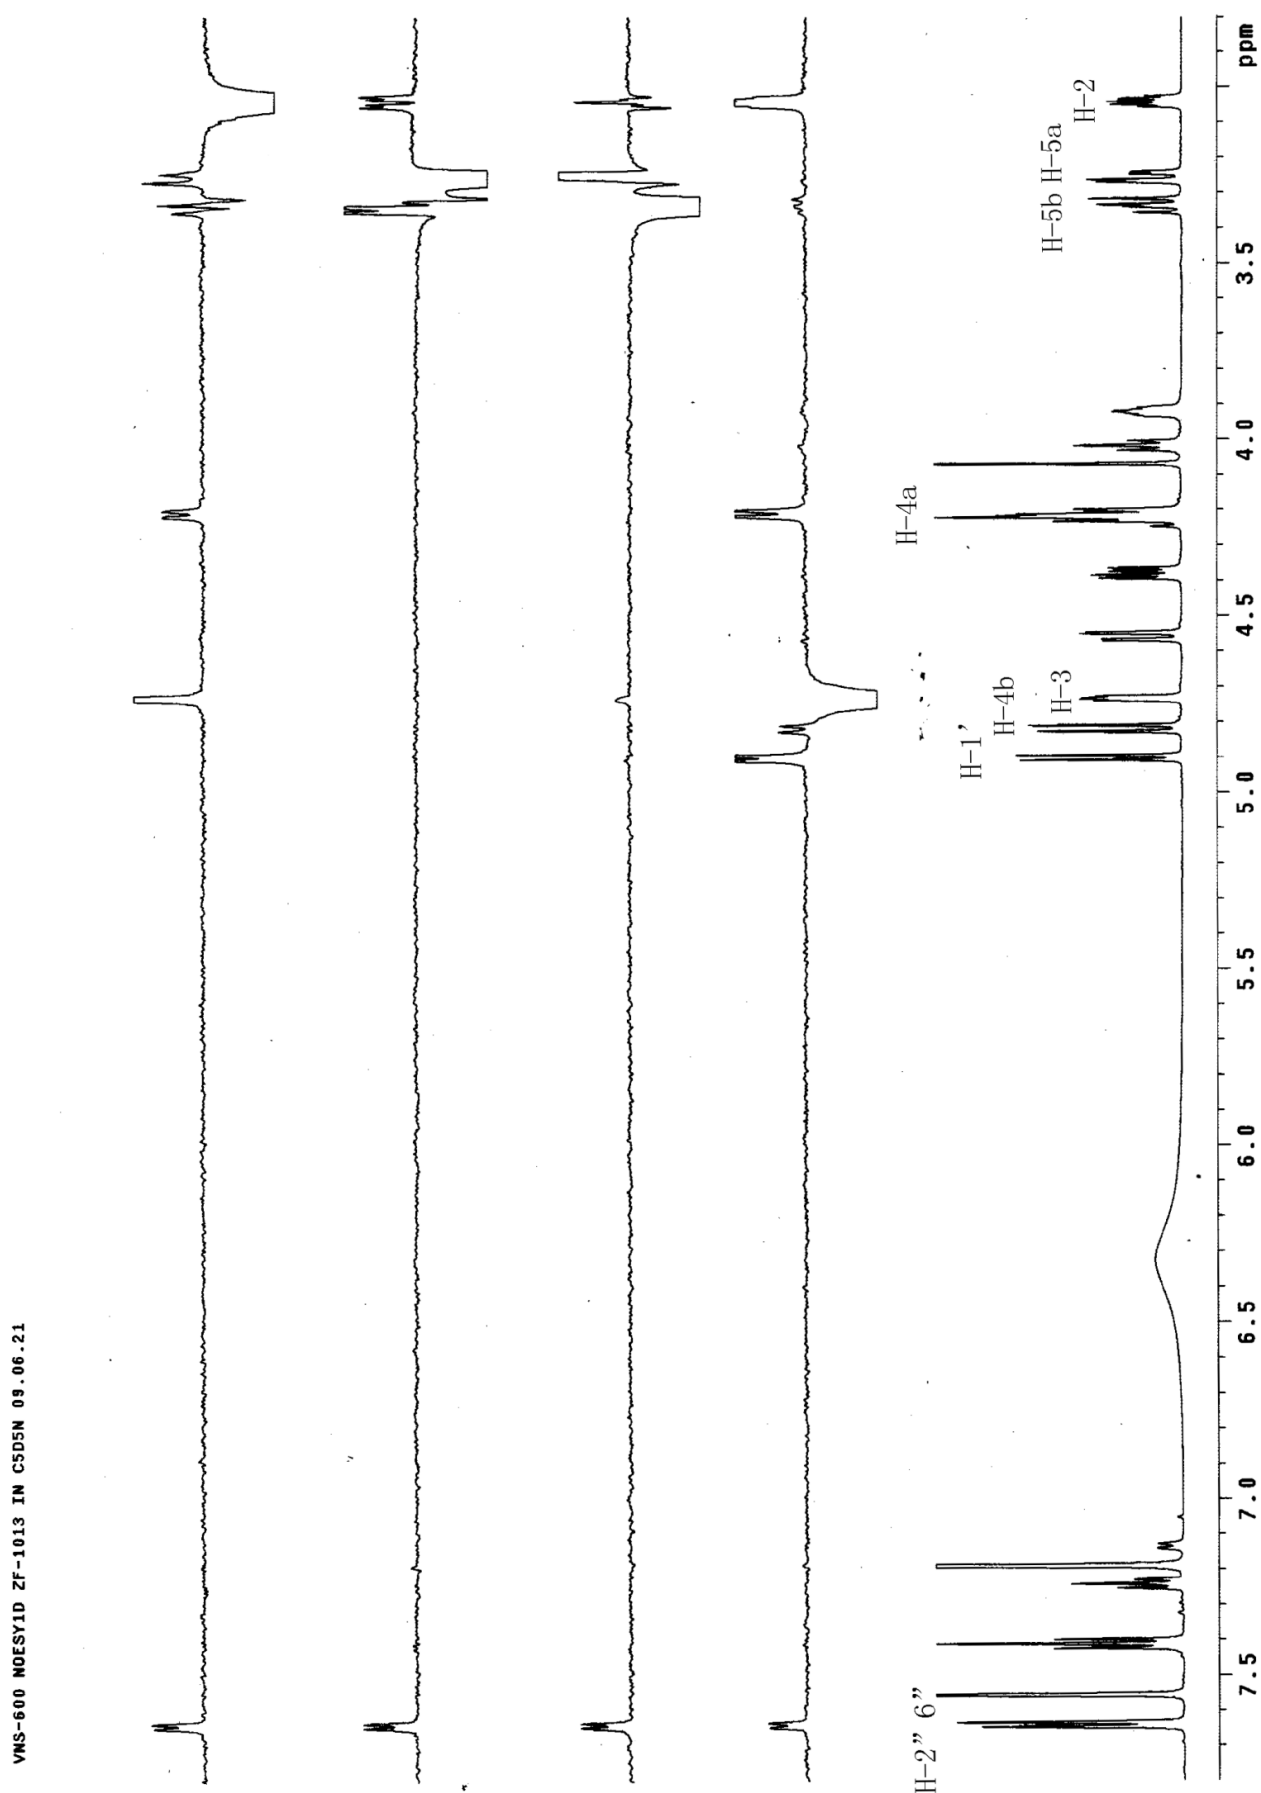

Figure 65.  $^{13}\text{C}$ -NMR of compound 7d.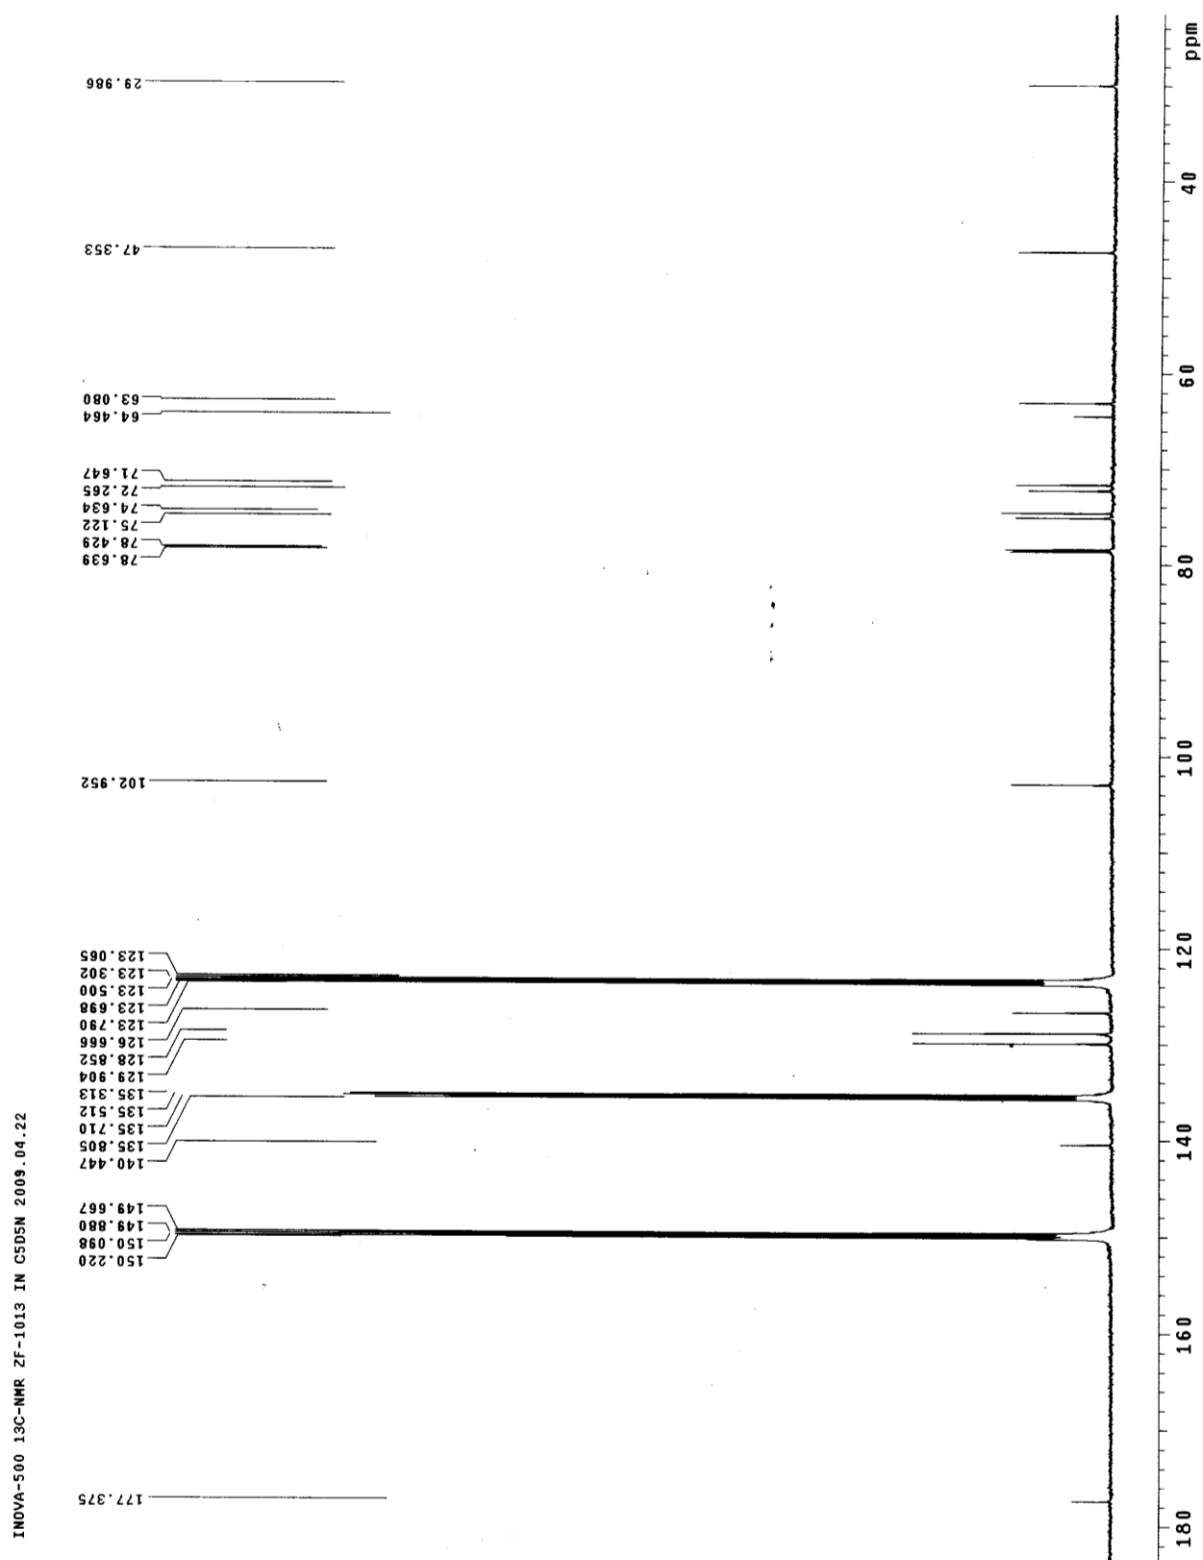

Figure 66. HRMS of compound 7d.

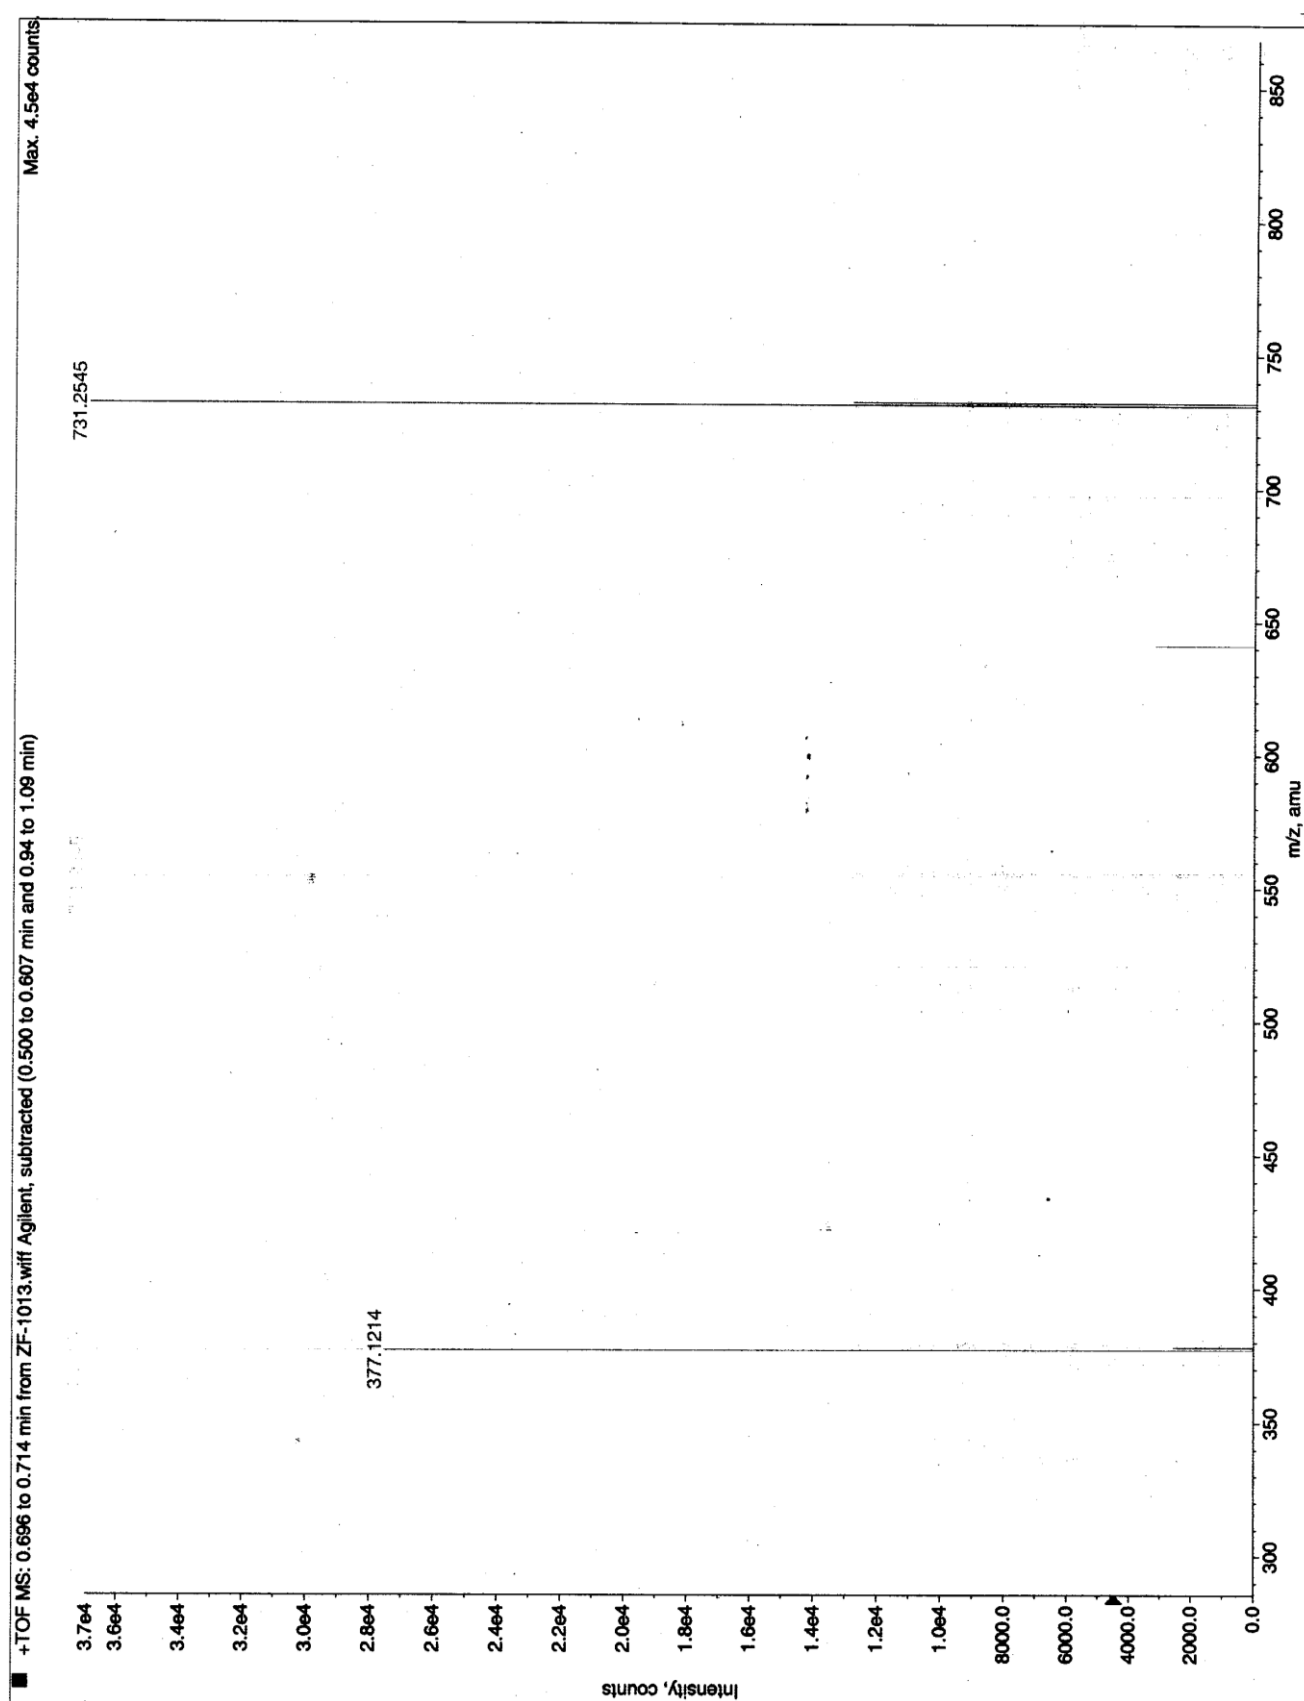



Figure 68.  $^{13}\text{C}$ -NMR of compound 7e.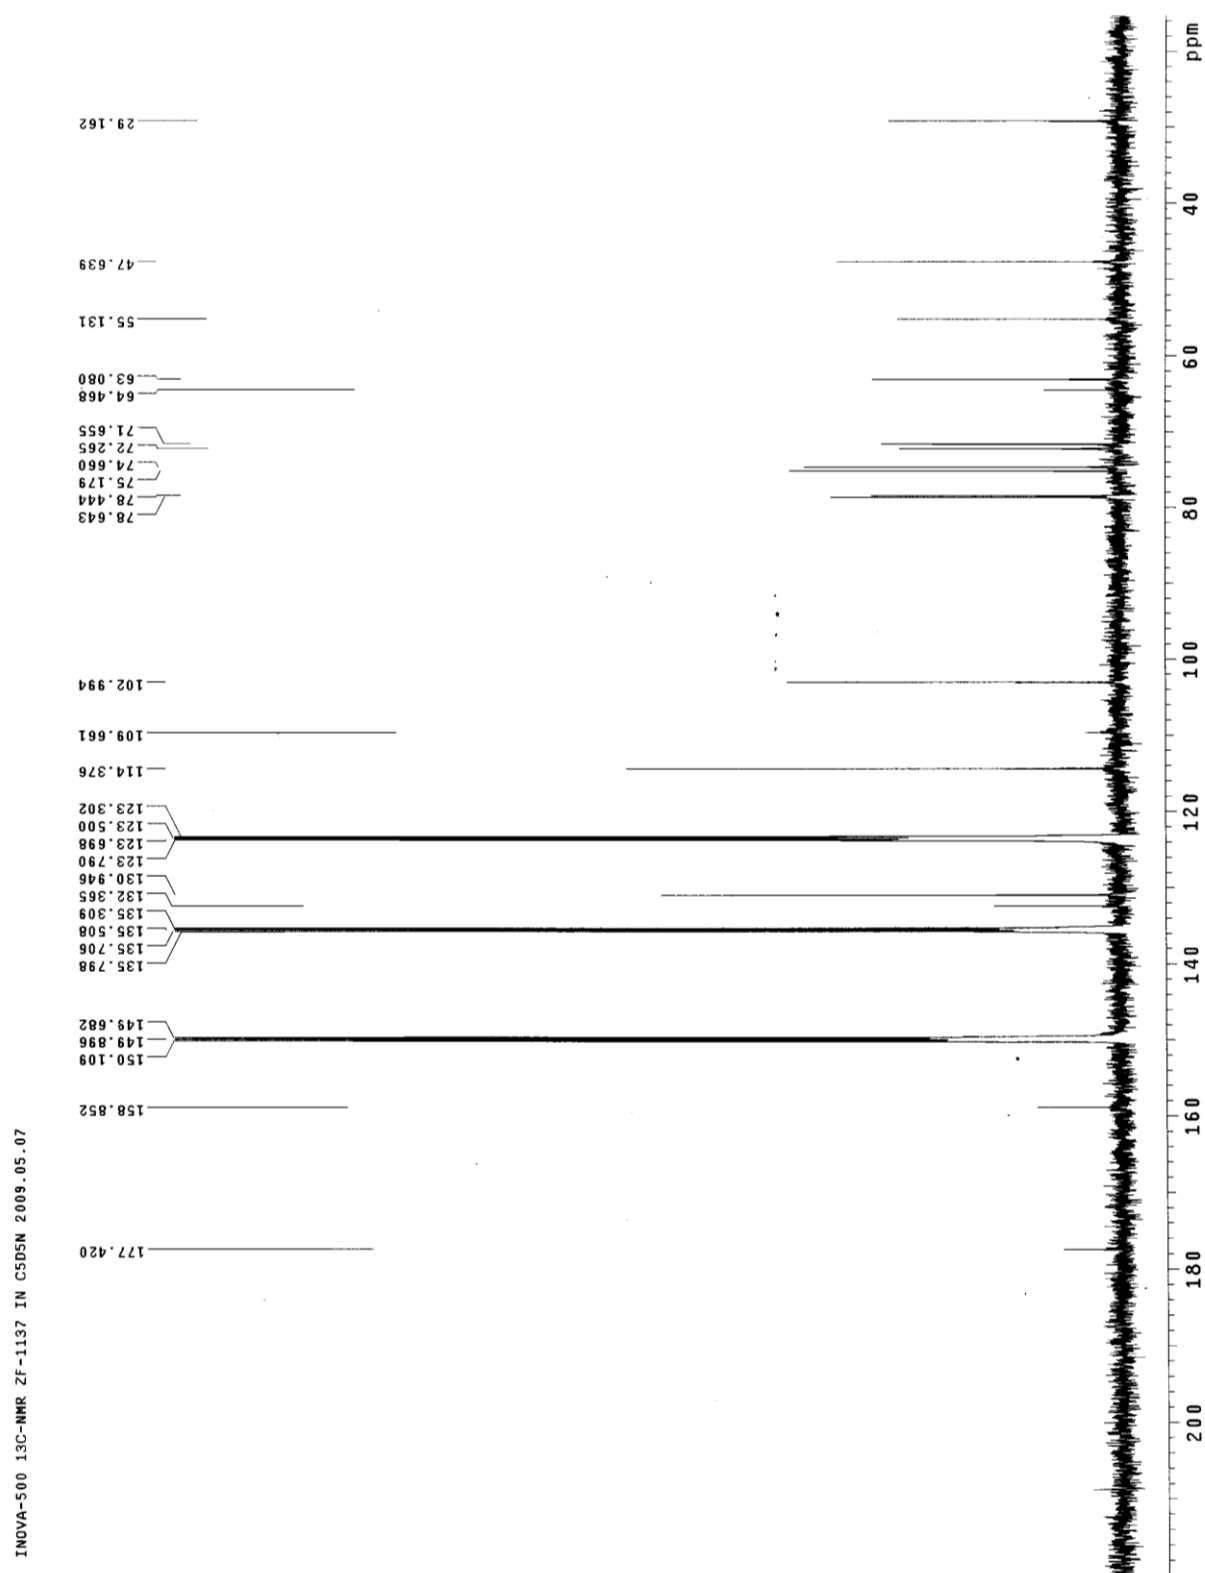



Figure 69. HRMS of compound 7e.

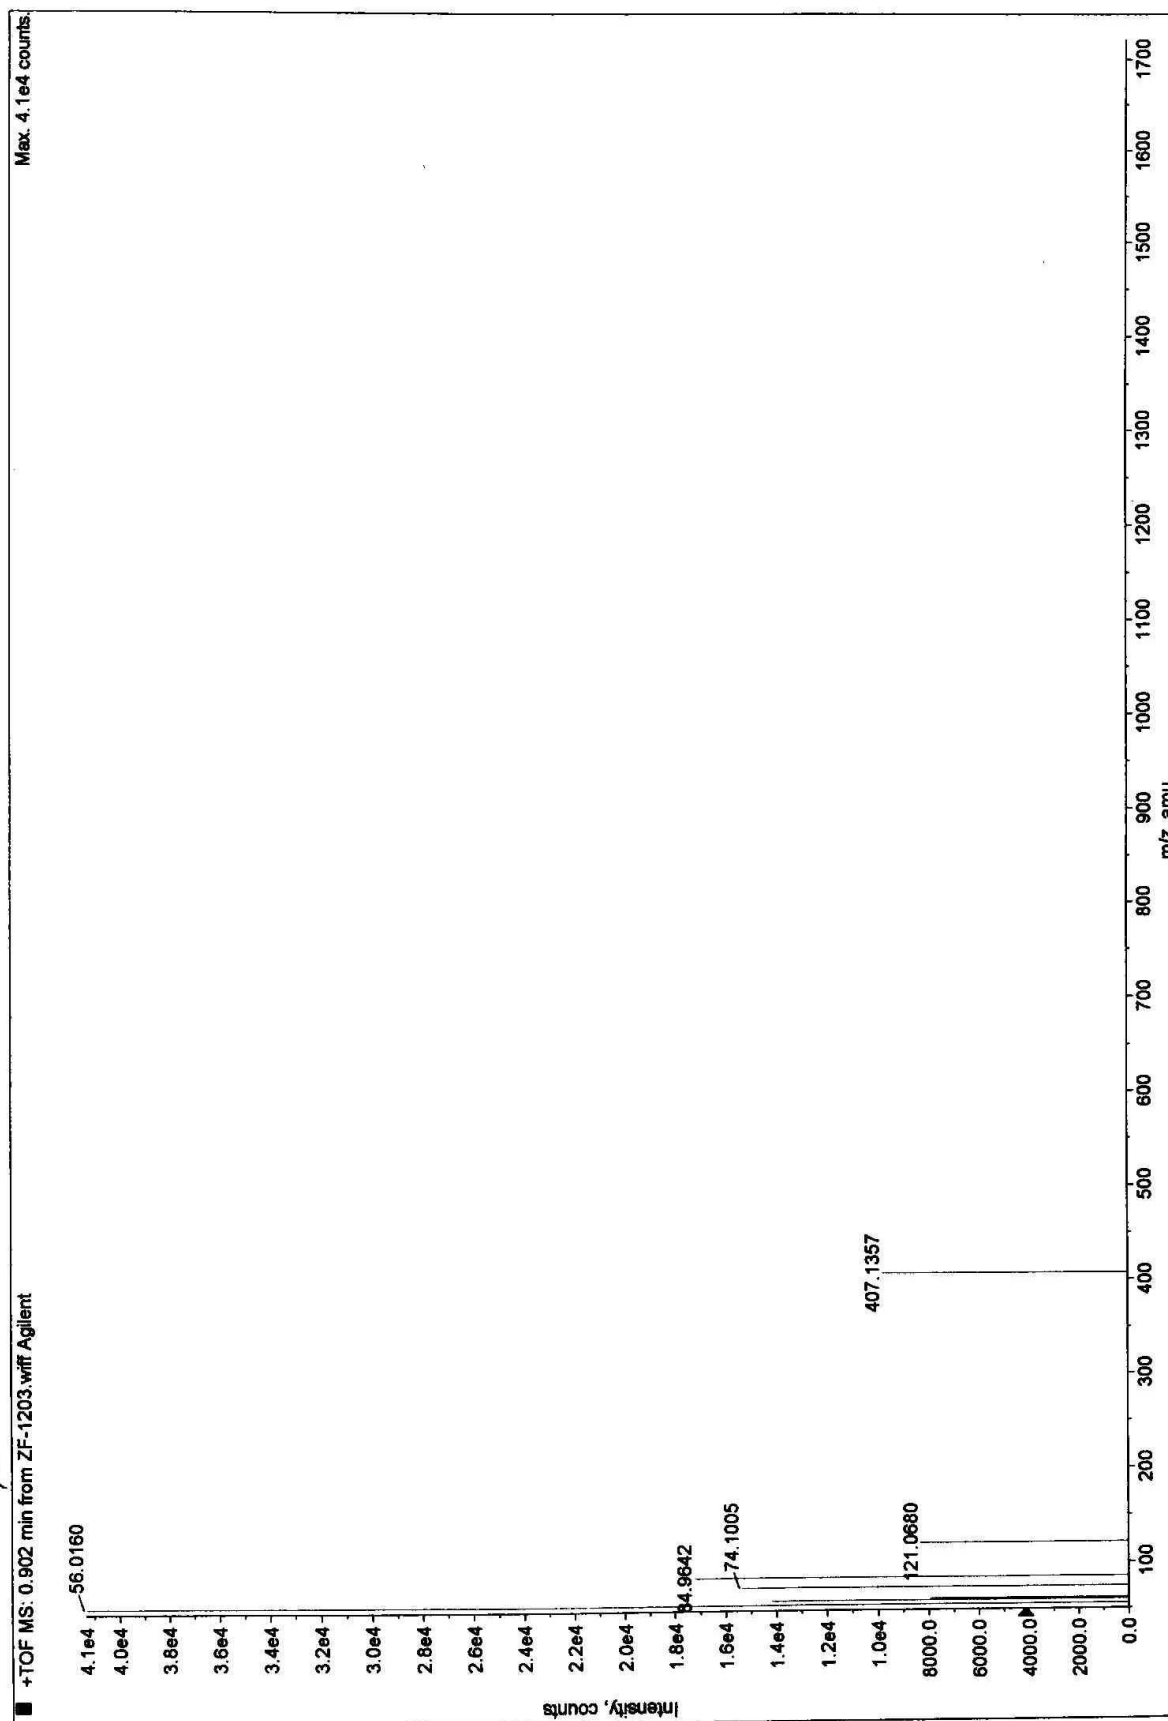

Supplement: s1 [file s1]
